# Supplementary material for: Hosting of diamantane alcohols in water and hydrogen-bonded organic solvents: the (non-)classical hydrophobic effect
Source: Royal Society of Chemistry journal article supplement (doi:10.1039/d3nj03097k), 2023-01-01
Supplement: d3nj03097k1.pdf [file d3nj03097k1.pdf]

## Hosting of diamantane alcohols in water and hydrogen-bonded organic solvents: the (non-)classical hydrophobic effect

Andrea Usenik,<sup>a</sup> Marija Alešković,<sup>b</sup> Sunčica Roca,<sup>c</sup> Iva Markuš,<sup>a</sup> Marina Šekutor,<sup>b,\*</sup>

Josip Požar<sup>a,\*</sup>

<sup>a</sup> *Department of Chemistry, Faculty of Science, University of Zagreb, Horvatovac 102a, 10 000 Zagreb, Croatia*

<sup>b</sup> *Department of Organic Chemistry and Biochemistry, Ruđer Bošković Institute, Bijenička 54, 10 000 Zagreb, Croatia*

<sup>c</sup> *NMR Center, Ruđer Bošković Institute, Bijenička 54, 10 000 Zagreb, Croatia*

**Keywords:** cyclodextrins, diamondoids, host-guest chemistry, hydrophobic effect, thermodynamics

## Contents

|                                                                                    |    |
|------------------------------------------------------------------------------------|----|
| <b>Microcalorimetric titrations in water: Cyclodextrins</b> .....                  | 3  |
| <b>1-DAOH with <math>\beta</math>-CD</b> in H <sub>2</sub> O .....                 | 3  |
| <b>4-DAOH with <math>\beta</math>-CD</b> in H <sub>2</sub> O .....                 | 5  |
| <b>4,9-DA(OH)<sub>2</sub> with <math>\beta</math>-CD</b> in H <sub>2</sub> O ..... | 7  |
| <b>1-AdOH with <math>\gamma</math>-CD</b> in H <sub>2</sub> O .....                | 10 |
| <b>1-DAOH with <math>\gamma</math>-CD</b> in H <sub>2</sub> O .....                | 13 |
| <b>4-DAOH with <math>\gamma</math>-CD</b> in H <sub>2</sub> O .....                | 14 |
| <b>4,9-DA(OH)<sub>2</sub> with <math>\gamma</math>-CD</b> in H <sub>2</sub> O..... | 16 |
| <b>2D NMR Spectra of investigated host-guest systems</b> .....                     | 19 |
| <b>Minimized geometries obtained by CREST computations</b> .....                   | 27 |
| <b>Microcalorimetric titrations in water: Cucurbiturils</b> .....                  | 28 |
| <b>1-DAOH with CB[7]</b> in H <sub>2</sub> O .....                                 | 28 |
| <b>4-DAOH with CB[7]</b> in H <sub>2</sub> O .....                                 | 31 |
| <b>4,9-DA(OH)<sub>2</sub> with CB[7]</b> in H <sub>2</sub> O .....                 | 33 |
| <b>1-AdOH with CB[8]</b> in H <sub>2</sub> O.....                                  | 37 |
| <b>4,9-DA(OH)<sub>2</sub> with CB[8]</b> in H <sub>2</sub> O .....                 | 40 |
| <b>Packing coefficients</b> .....                                                  | 42 |
| <b>Microcalorimetric titrations in formamide (FMD)</b> .....                       | 43 |
| <b>1-DAOH with <math>\beta</math>-CD</b> in FMD.....                               | 43 |
| <b>4-DAOH with <math>\beta</math>-CD</b> in FMD.....                               | 45 |
| <b>4,9-DA(OH)<sub>2</sub> with <math>\beta</math>-CD</b> in FMD.....               | 48 |
| <b>Microcalorimetric titrations in ethylene glycol (EG)</b> .....                  | 50 |
| <b>1-DAOH with <math>\beta</math>-CD</b> in EG .....                               | 50 |
| <b>4-DAOH with <math>\beta</math>-CD</b> in EG .....                               | 51 |
| <b>4,9-DA(OH)<sub>2</sub> with <math>\beta</math>-CD</b> in EG .....               | 54 |
| <b>Geometries of studied CD complexes</b> .....                                    | 57 |

## Microcalorimetric titrations in water: Cyclodextrins

### 1-DAOH with $\beta$ -CD in H<sub>2</sub>O

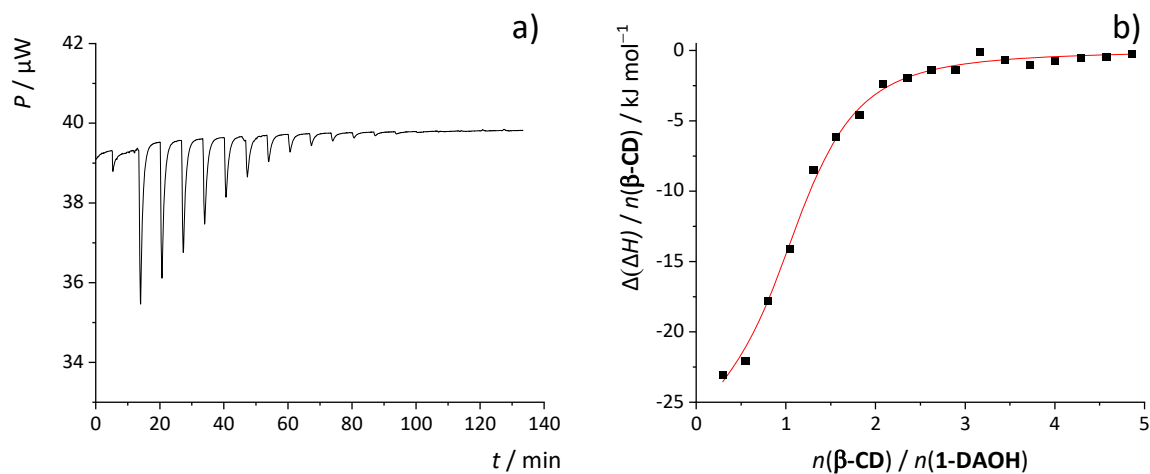

**Figure S1.** Microcalorimetric titration of **1-DAOH** ( $c_0 = 3 \cdot 10^{-5} \text{ mol dm}^{-3}$ ,  $V_0 = 1.45 \text{ mL}$ ) with  $\beta\text{-CD}$  ( $c = 7 \cdot 10^{-3} \text{ mol dm}^{-3}$ ) in H<sub>2</sub>O at 278 K. a) Thermogram. b) The dependence of normalized successive enthalpy changes on host to guest molar ratio. ■ experimental; – calculated.

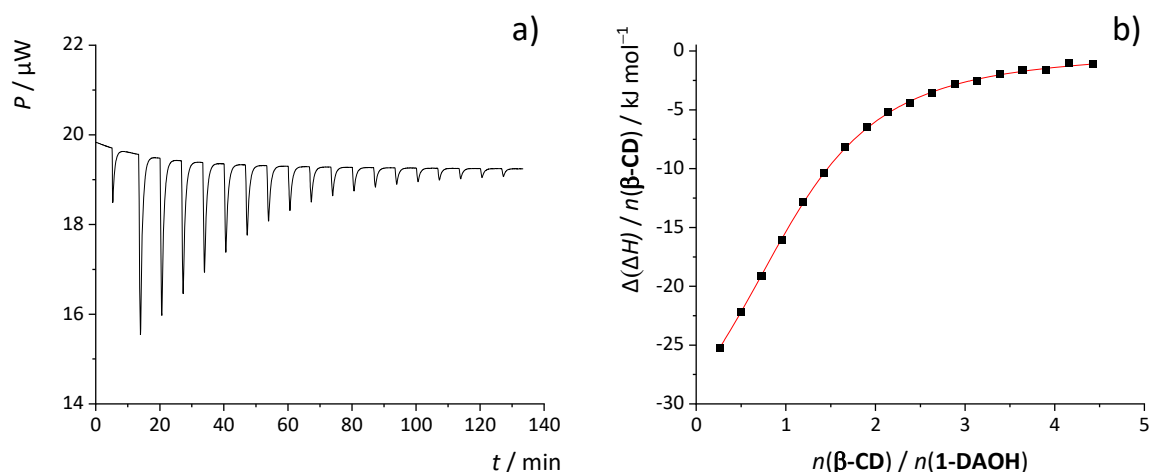

**Figure S2.** Microcalorimetric titration of **1-DAOH** ( $c_0 = 3 \cdot 10^{-5} \text{ mol dm}^{-3}$ ,  $V_0 = 1.45 \text{ mL}$ ) with  $\beta\text{-CD}$  ( $c = 6 \cdot 10^{-3} \text{ mol dm}^{-3}$ ) in at 298 K. a) Thermogram. b) The dependence of normalized successive enthalpy changes on host to guest molar ratio. ■ experimental; – calculated.

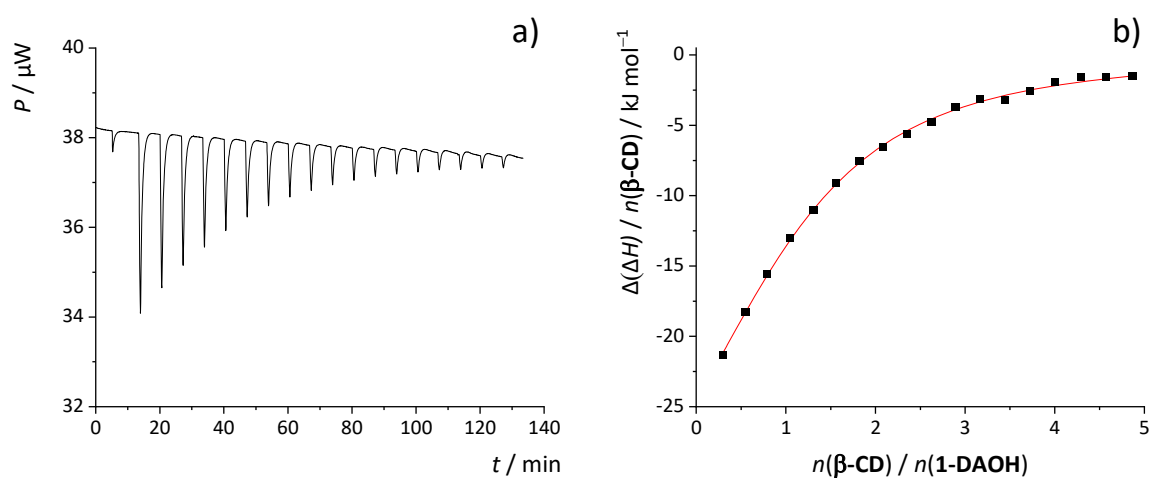

**Figure S3.** Microcalorimetric titration of **1-DAOH** ( $c_0 = 3 \cdot 10^{-5} \text{ mol dm}^{-3}$ ,  $V_0 = 1.45 \text{ mL}$ ) with  $\beta\text{-CD}$  ( $c = 7 \cdot 10^{-3} \text{ mol dm}^{-3}$ ) in at 318 K. a) Thermogram. b) The dependence of normalized successive enthalpy changes on host to guest molar ratio. ■ experimental; – calculated.

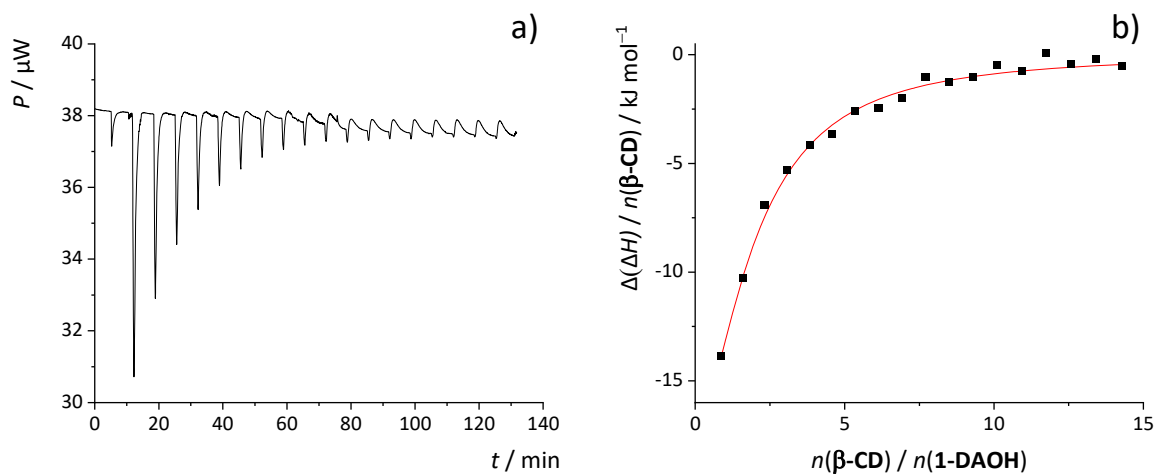

**Figure S4.** Microcalorimetric titration of **1-DAOH** ( $c_0 = 3 \cdot 10^{-5} \text{ mol dm}^{-3}$ ,  $V_0 = 1.45 \text{ mL}$ ) with  **$\beta$ -CD** ( $c = 2 \cdot 10^{-3} \text{ mol dm}^{-3}$ ) in  $\text{H}_2\text{O}$  at 338 K. a) Thermogram. b) The dependence of normalized successive enthalpy changes on host to guest molar ratio. ■ experimental; — calculated.

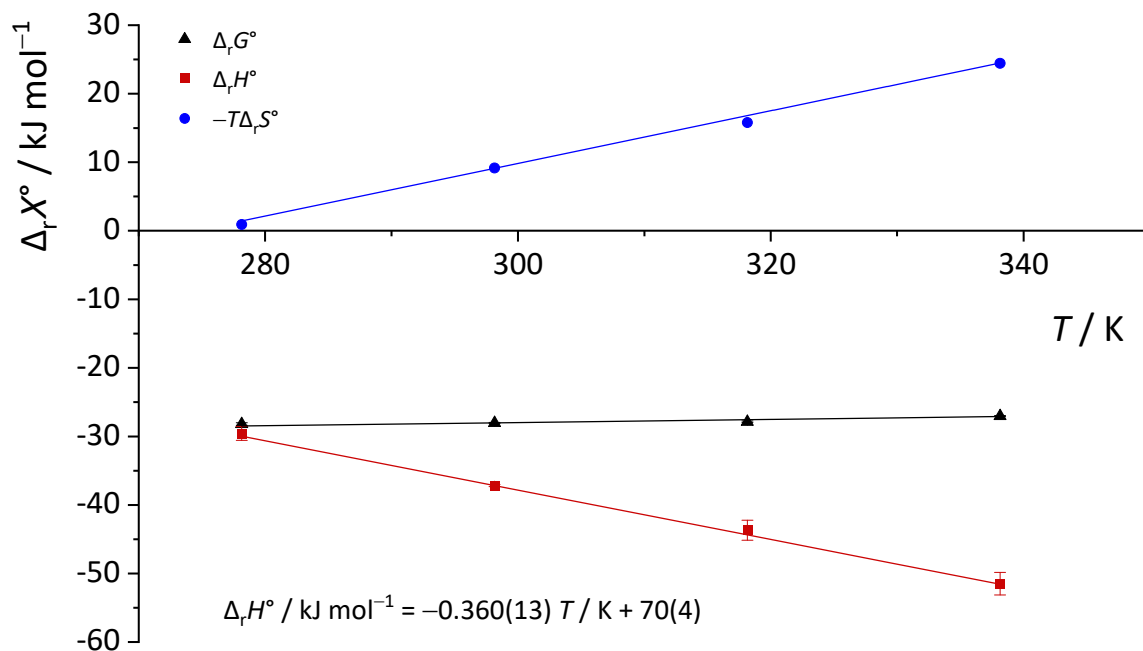

**Figure S5.** The temperature dependence of standard complexation parameters of **1-DAOH** with  **$\beta$ -CD** in  $\text{H}_2\text{O}$ .

4-DAOH with  $\beta$ -CD in H<sub>2</sub>O

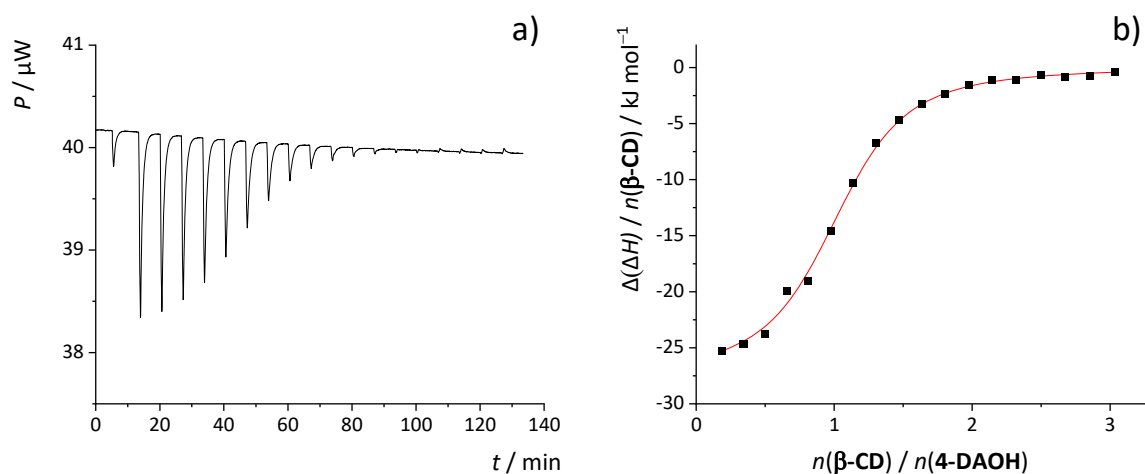

**Figure S6.** Microcalorimetric titration of 4-DAOH ( $c_0 = 2 \cdot 10^{-5} \text{ mol dm}^{-3}$ ,  $V_0 = 1.45 \text{ mL}$ ) with  $\beta$ -CD ( $c = 3 \cdot 10^{-4} \text{ mol dm}^{-3}$ ) in H<sub>2</sub>O at 278 K. a) Thermogram. b) The dependence of normalized successive enthalpy changes on host to guest molar ratio. ■ experimental; – calculated.

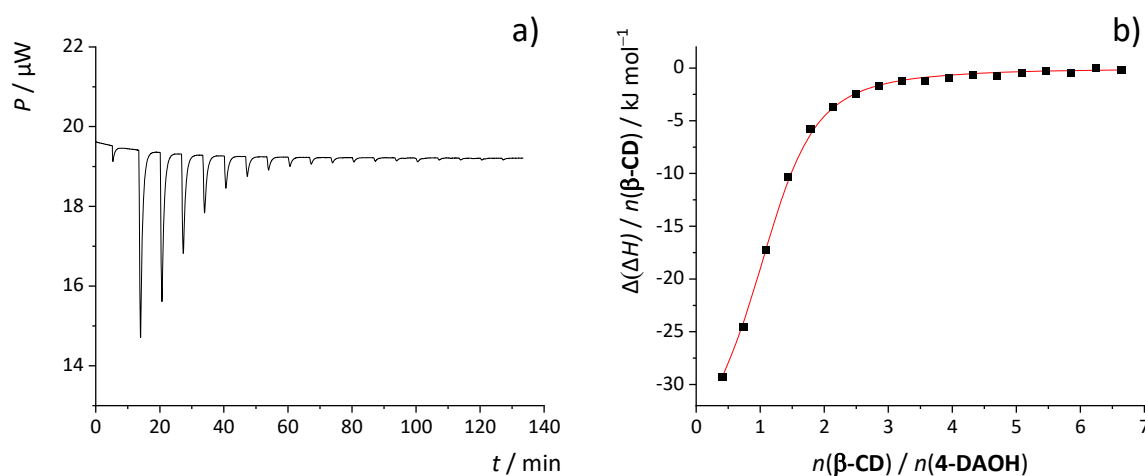

**Figure S7.** Microcalorimetric titration of 4-DAOH ( $c_0 = 2 \cdot 10^{-5} \text{ mol dm}^{-3}$ ,  $V_0 = 1.45 \text{ mL}$ ) with  $\beta$ -CD ( $c = 6 \cdot 10^{-4} \text{ mol dm}^{-3}$ ) in H<sub>2</sub>O at 298 K. a) Thermogram. b) The dependence of normalized successive enthalpy changes on host to guest molar ratio. ■ experimental; – calculated.

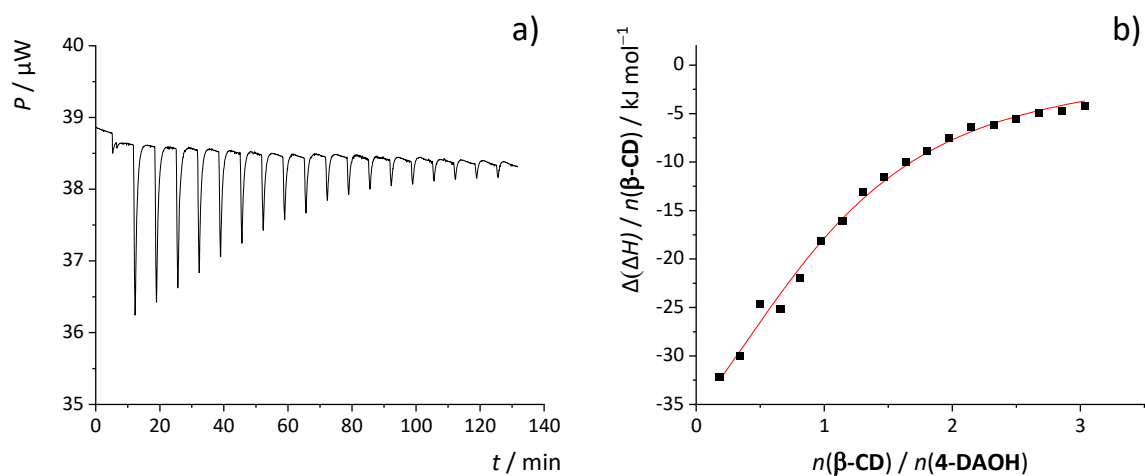

**Figure S8.** Microcalorimetric titration of 4-DAOH ( $c_0 = 2 \cdot 10^{-5} \text{ mol dm}^{-3}$ ,  $V_0 = 1.45 \text{ mL}$ ) with  $\beta$ -CD ( $c = 3 \cdot 10^{-4} \text{ mol dm}^{-3}$ ) in H<sub>2</sub>O at 318 K. a) Thermogram. b) The dependence of normalized successive enthalpy changes on host to guest molar ratio. ■ experimental; – calculated.

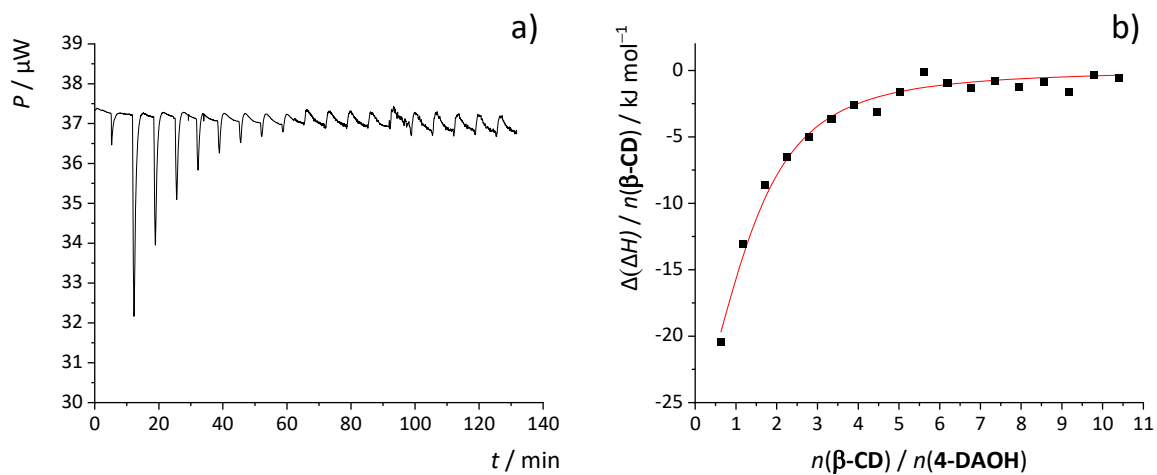

**Figure S9.** Microcalorimetric titration 4-DAOH ( $c_0 = 2 \cdot 10^{-5} \text{ mol dm}^{-3}$ ,  $V_0 = 1.45 \text{ mL}$ ) with  $\beta\text{-CD}$  ( $c = 1 \cdot 10^{-3} \text{ mol dm}^{-3}$ ) in  $\text{H}_2\text{O}$  at 338 K. a) Thermogram. b) The dependence of normalized successive enthalpy changes on host to guest molar ratio. ■ experimental; – calculated.

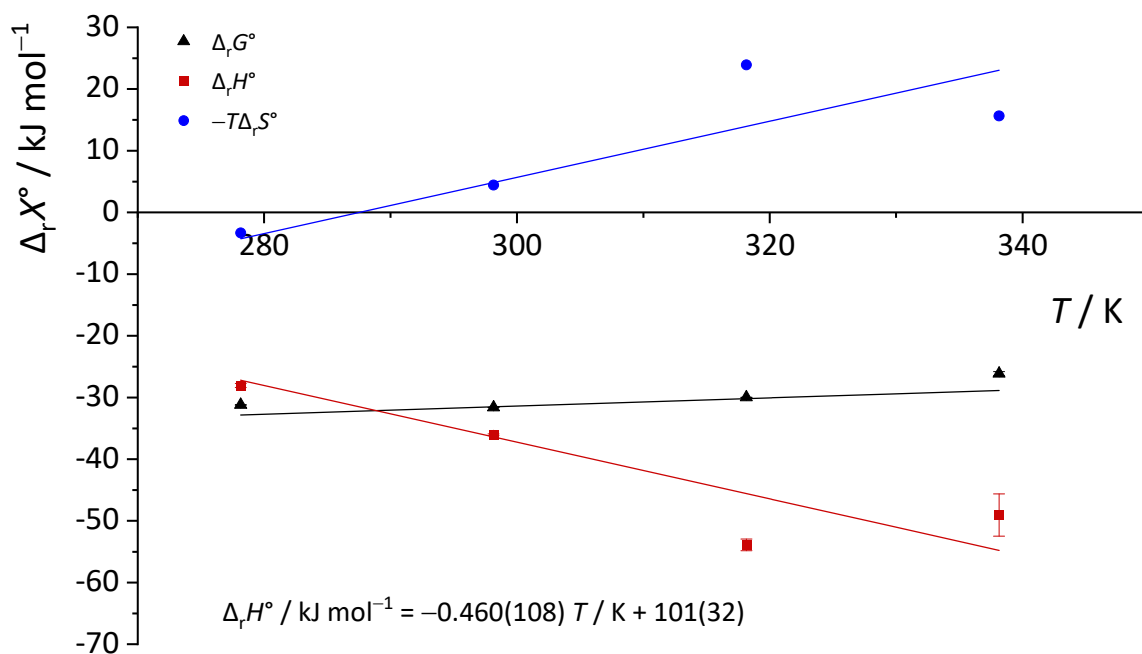

**Figure S10.** The temperature dependence of standard complexation parameters of 4-DAOH with  $\beta\text{-CD}$  in  $\text{H}_2\text{O}$ .

### 4,9-DA(OH)<sub>2</sub> with $\beta$ -CD in H<sub>2</sub>O

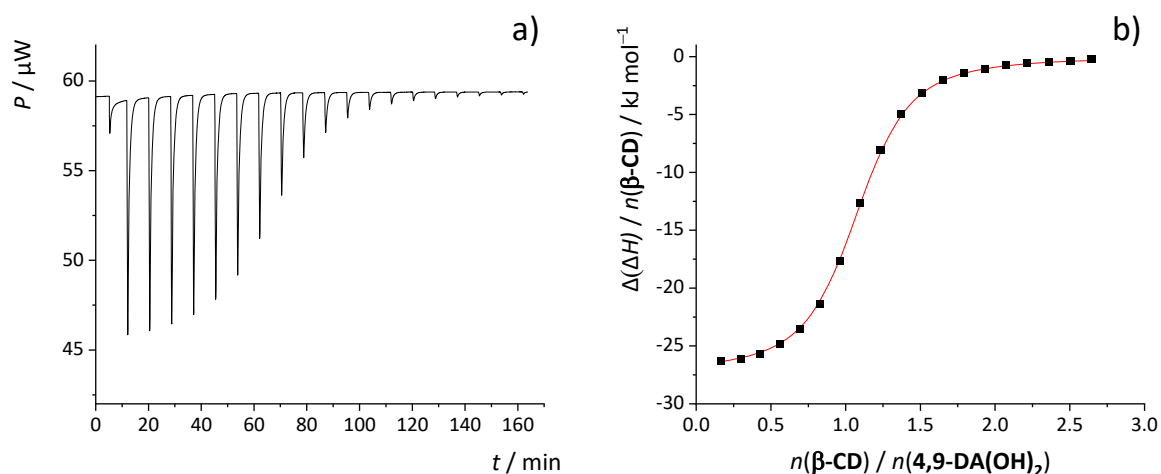

**Figure S11.** Microcalorimetric titration of 4,9-DA(OH)<sub>2</sub> ( $c_0 = 1 \cdot 10^{-4} \text{ mol dm}^{-3}$ ,  $V_0 = 1.45 \text{ mL}$ ) with  $\beta$ -CD ( $c = 3 \cdot 10^{-3} \text{ mol dm}^{-3}$ ) in H<sub>2</sub>O at 278 K. a) Thermogram. b) The dependence of normalized successive enthalpy changes on host to guest molar ratio. ■ experimental; — calculated.

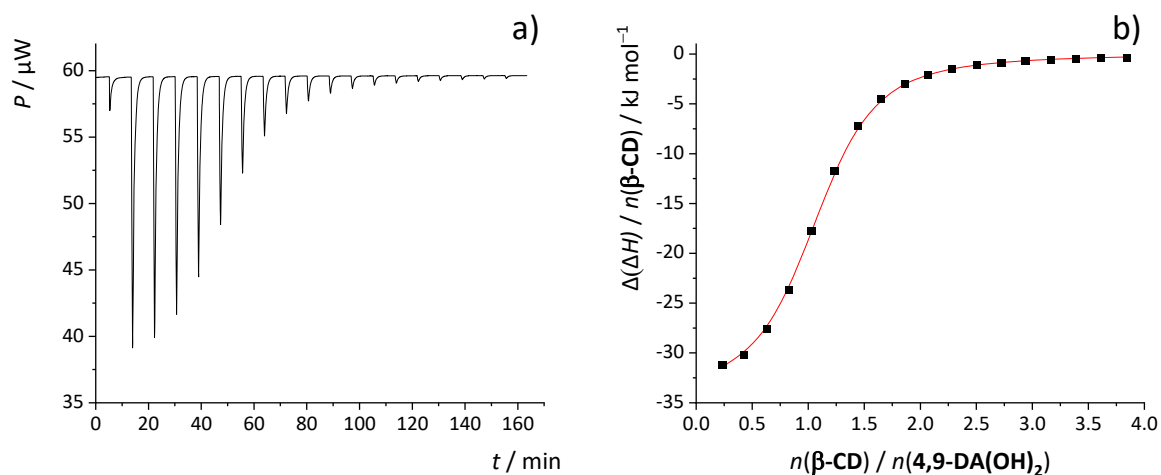

**Figure S12.** Microcalorimetric titration of 4,9-DA(OH)<sub>2</sub> ( $c_0 = 1 \cdot 10^{-4} \text{ mol dm}^{-3}$ ,  $V_0 = 1.45 \text{ mL}$ ) with  $\beta$ -CD ( $c = 3 \cdot 10^{-3} \text{ mol dm}^{-3}$ ) in H<sub>2</sub>O at 298 K. a) Thermogram. b) The dependence of normalized successive enthalpy changes on host to guest molar ratio. ■ experimental; — calculated.

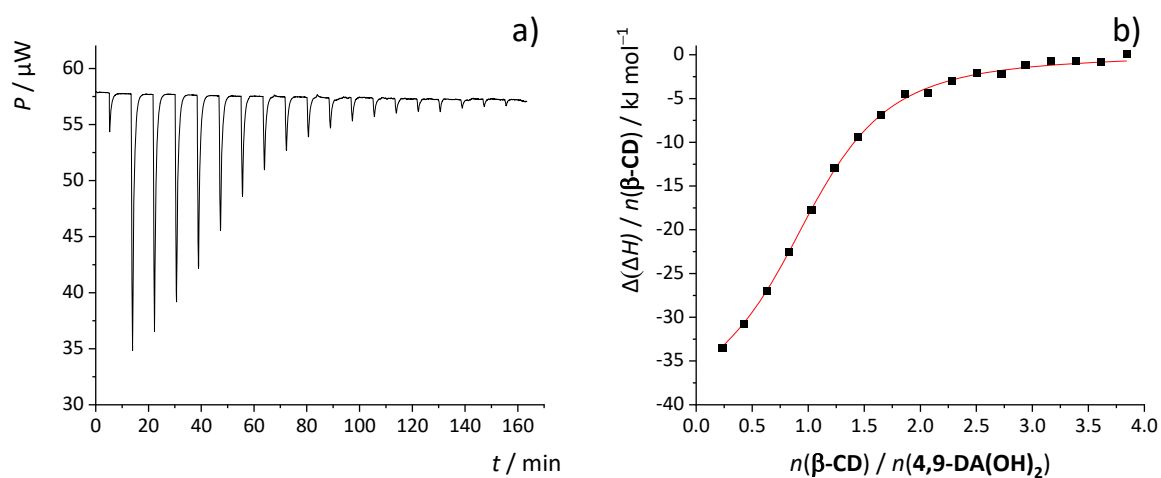

**Figure S13.** Microcalorimetric titration of 4,9-DA(OH)<sub>2</sub> ( $c_0 = 1 \cdot 10^{-4} \text{ mol dm}^{-3}$ ,  $V_0 = 1.45 \text{ mL}$ ) with  $\beta$ -CD ( $c = 3 \cdot 10^{-3} \text{ mol dm}^{-3}$ ) in H<sub>2</sub>O at 318 K. a) Thermogram. b) The dependence of normalized successive enthalpy changes on host to guest molar ratio. ■ experimental; — calculated.

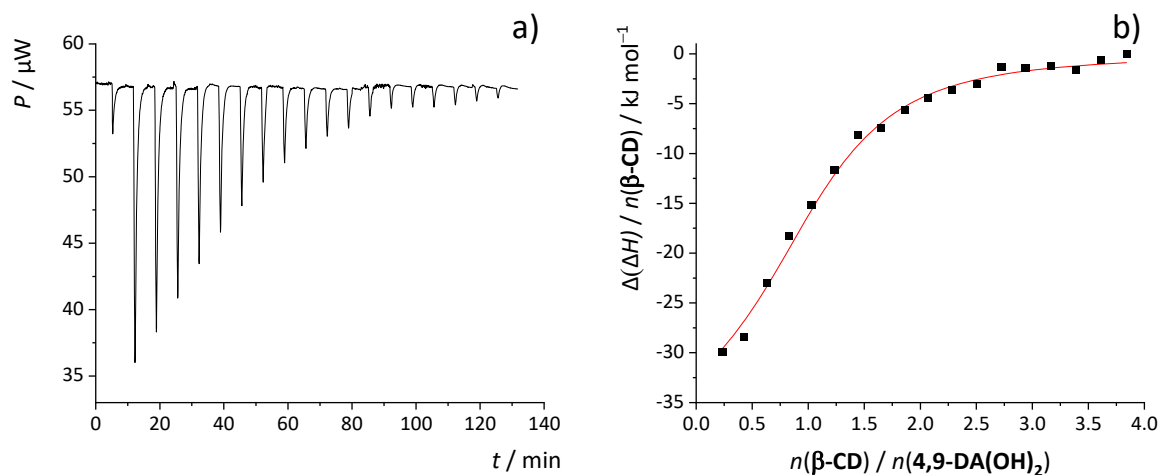

**Figure S14.** Microcalorimetric titration of **4,9-DA(OH)<sub>2</sub>** ( $c_0 = 1 \cdot 10^{-4} \text{ mol dm}^{-3}$ ,  $V_0 = 1.45 \text{ mL}$ ) with  **$\beta$ -CD** ( $c = 3 \cdot 10^{-3} \text{ mol dm}^{-3}$ ) in  $\text{H}_2\text{O}$  at 338 K. a) Thermogram. b) The dependence of normalized successive enthalpy changes on host to guest molar ratio. ■ experimental; — calculated.

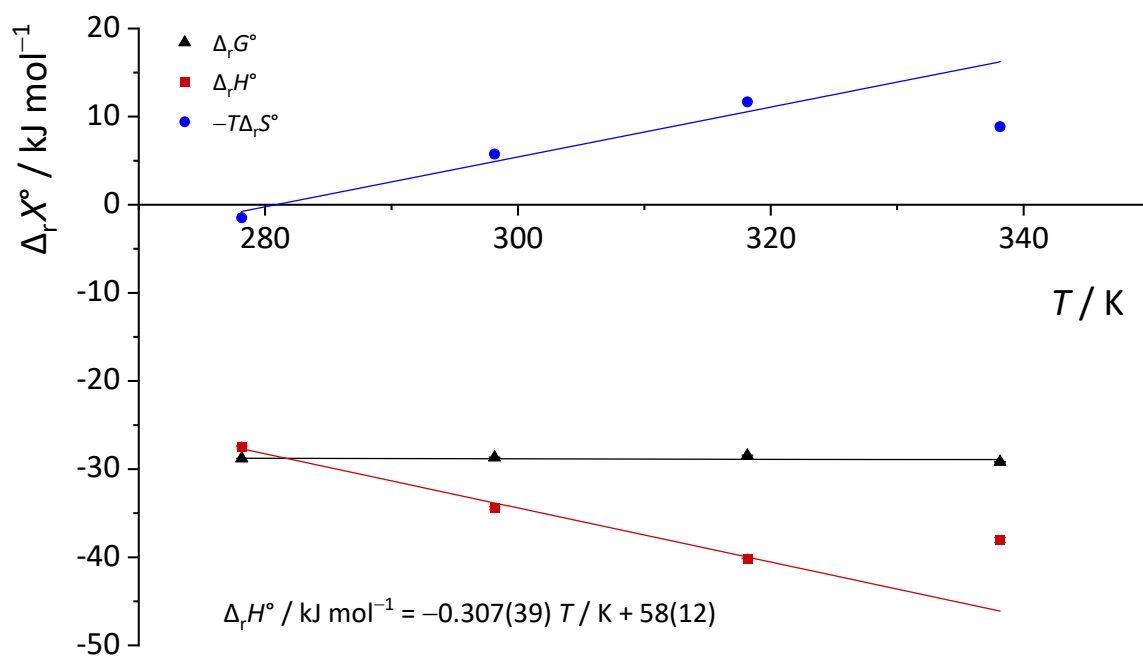

**Figure S15.** The temperature dependence of standard complexation parameters of **4,9-DA(OH)<sub>2</sub>** with  **$\beta$ -CD** in  $\text{H}_2\text{O}$ .



**Table S1.** Thermodynamic parameters for complexation of **1-AdOH** and diamantane alcohols with  $\beta$ -CD in H<sub>2</sub>O.<sup>[a]</sup>

| GUEST · $\beta$ -CD           | <i>T</i> / K | log <i>K</i> | $\Delta_r G^\circ$ / kJ mol <sup>-1</sup> | $\Delta_r H^\circ$ / kJ mol <sup>-1</sup> | $-T\Delta_r S^\circ$ / kJ mol <sup>-1</sup> | $\Delta_r C_p^\circ$ / J K <sup>-1</sup> mol <sup>-1</sup> |
|-------------------------------|--------------|--------------|-------------------------------------------|-------------------------------------------|---------------------------------------------|------------------------------------------------------------|
| <b>1-AdOH</b> <sup>[b]</sup>  | 278          | 4.90(1)      | -26.08(1)                                 | -14.88(5)                                 | -11.23(5)                                   | -391(36)                                                   |
|                               | 298          | 4.66(1)      | -26.38(3)                                 | -21.86(6)                                 | -4.53(5)                                    |                                                            |
|                               | 308          | 4.49(1)      | -26.46(3)                                 | -27.68(7)                                 | 1.20(9)                                     |                                                            |
|                               | 338          | 4.06(1)      | -26.26(4)                                 | -36.5(2)                                  | 10.2(3)                                     |                                                            |
| <b>1-DAOH</b>                 | 278          | 5.30(4)      | -28.2(2)                                  | -30(1)                                    | 1(1)                                        | -360(13)                                                   |
|                               | 298          | 4.91(1)      | -28.02(6)                                 | -37.2(2)                                  | 9.2(2)                                      |                                                            |
|                               | 318          | 4.58(2)      | -27.9(1)                                  | -44(1)                                    | 16(2)                                       |                                                            |
|                               | 338          | 4.18(1)      | -27.03(7)                                 | -52(2)                                    | 24(2)                                       |                                                            |
| <b>4-DAOH</b>                 | 278          | 5.86(1)      | -31.21(6)                                 | -28.1(3)                                  | -3.3(3)                                     | -460(108)                                                  |
|                               | 298          | 5.54(1)      | -31.61(1)                                 | -36.0(1)                                  | 4.4(2)                                      |                                                            |
|                               | 318          | 4.92(1)      | -29.97(2)                                 | -53.9(9)                                  | 24(1)                                       |                                                            |
|                               | 338          | 4.74(6)      | -26.1(3)                                  | -49(3)                                    | 16(3)                                       |                                                            |
| <b>4,9-DA(OH)<sub>2</sub></b> | 278          | 5.41(1)      | -28.79(1)                                 | -27.41(7)                                 | -1.5(1)                                     | -307(39)                                                   |
|                               | 298          | 5.02(1)      | -28.67(4)                                 | -34.5(2)                                  | 5.8(2)                                      |                                                            |
|                               | 318          | 4.67(1)      | -28.45(6)                                 | -40.13(3)                                 | 11.68(8)                                    |                                                            |
|                               | 338          | 4.51(1)      | -29.17(5)                                 | -38.0(3)                                  | 8.9(3)                                      |                                                            |

[a] Uncertainties of the last digit(s) are given in parentheses as standard errors of the mean ( $N = 3-5$ ), or standard deviations obtained by weighted linear regression analysis (for  $\Delta_r C_p^\circ$  values); [b] Reference: K. Leko, M. Hanževački, Z. Brkljača, K. Pičuljan, R. Ribić, J. Požar, *Chem. Eur. J.* **2020**, *26*, 5208–5219.

Even though larger thermal noise was in some cases associated with experiments carried out at 278 and 338 K, or that complexation enthalpy was occasionally close to zero, the obtained linear  $\Delta_r H^\circ(T)$  dependencies and the standard errors of the mean obtained by repetitive titration experiments indicate the reliability of determined thermodynamic complexation parameters.

### 1-AdOH with $\gamma$ -CD in H<sub>2</sub>O

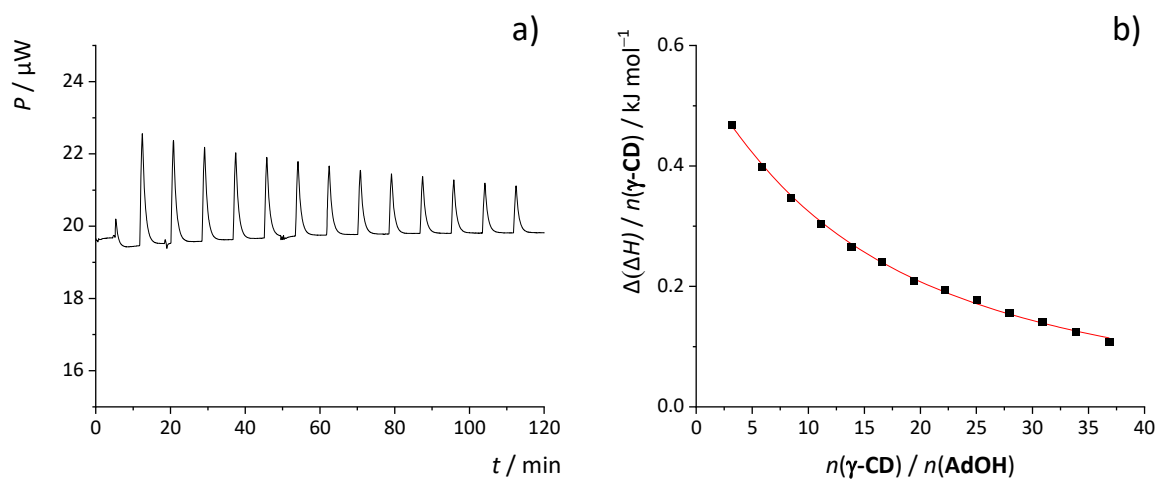

**Figure S16.** Microcalorimetric titration of **1-AdOH** ( $c_0 = 1 \cdot 10^{-4} \text{ mol dm}^{-3}$ ,  $V_0 = 1.45 \text{ mL}$ ) with  $\gamma\text{-CD}$  ( $c = 2 \cdot 10^{-2} \text{ mol dm}^{-3}$ ) in H<sub>2</sub>O at 278 K. a) Thermogram. b) The dependence of normalized successive enthalpy changes on host to guest molar ratio. ■ experimental; - calculated.

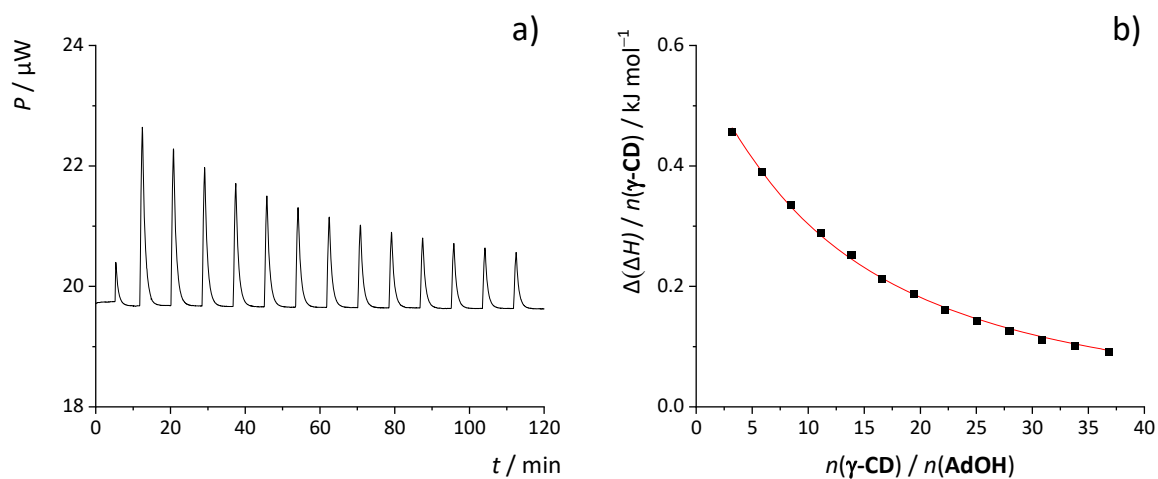

**Figure S17.** Microcalorimetric titration of **1-AdOH** ( $c_0 = 1 \cdot 10^{-4} \text{ mol dm}^{-3}$ ,  $V_0 = 1.45 \text{ mL}$ ) with  $\gamma\text{-CD}$  ( $c = 2 \cdot 10^{-2} \text{ mol dm}^{-3}$ ) in H<sub>2</sub>O at 288 K. a) Thermogram. b) The dependence of normalized successive enthalpy changes on host to guest molar ratio. ■ experimental; - calculated.

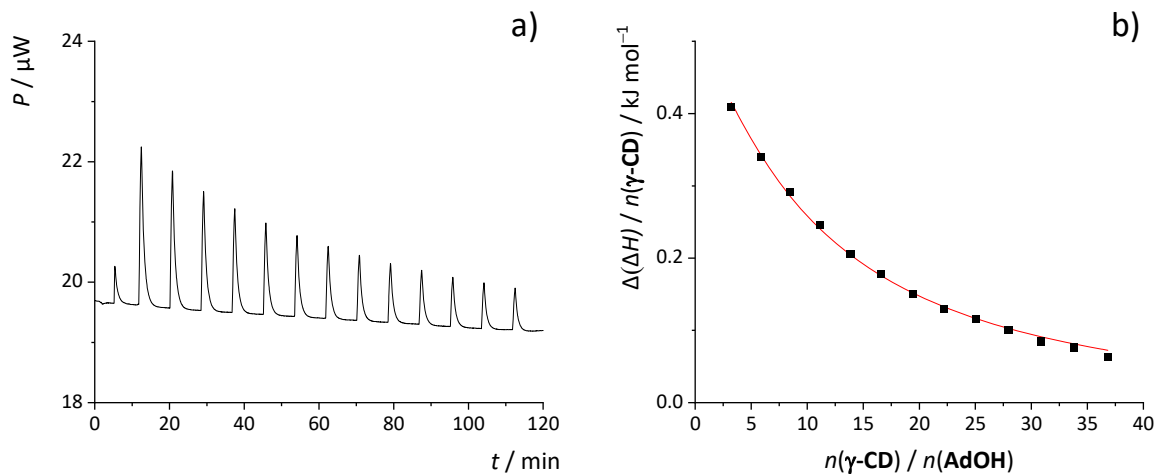

**Figure S18.** Microcalorimetric titration of **1-AdOH** ( $c_0 = 1 \cdot 10^{-4} \text{ mol dm}^{-3}$ ,  $V_0 = 1.45 \text{ mL}$ ) with  $\gamma\text{-CD}$  ( $c = 2 \cdot 10^{-2} \text{ mol dm}^{-3}$ ) in  $\text{H}_2\text{O}$  at 298 K. a) Thermogram. b) The dependence of normalized successive enthalpy changes on host to guest molar ratio. ■ experimental; - calculated.

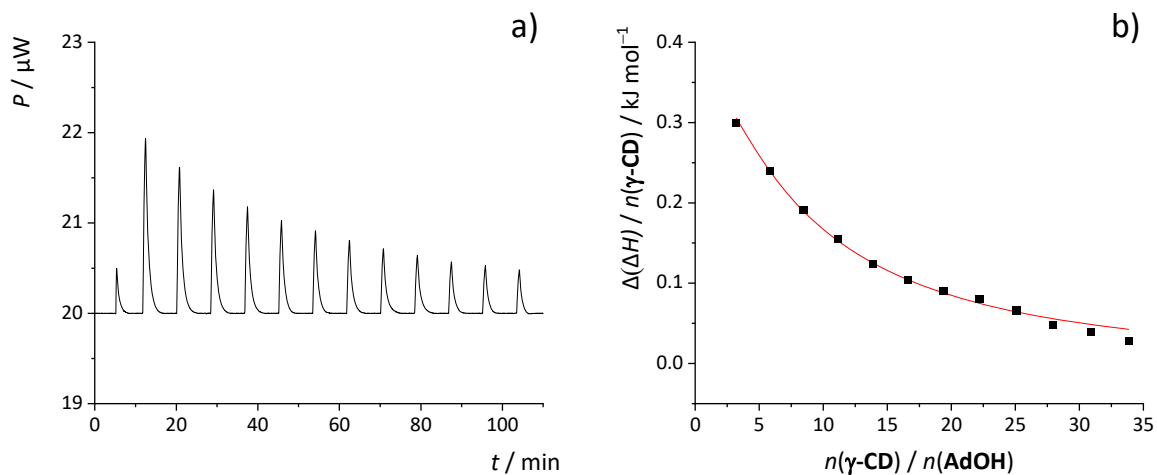

**Figure S19.** Microcalorimetric titration of **1-AdOH** ( $c_0 = 1 \cdot 10^{-4} \text{ mol dm}^{-3}$ ,  $V_0 = 1.45 \text{ mL}$ ) with  $\gamma\text{-CD}$  ( $c = 2 \cdot 10^{-2} \text{ mol dm}^{-3}$ ) in  $\text{H}_2\text{O}$  at 308 K. a) Thermogram. b) The dependence of normalized successive enthalpy changes on host to guest molar ratio. ■ experimental; - calculated.

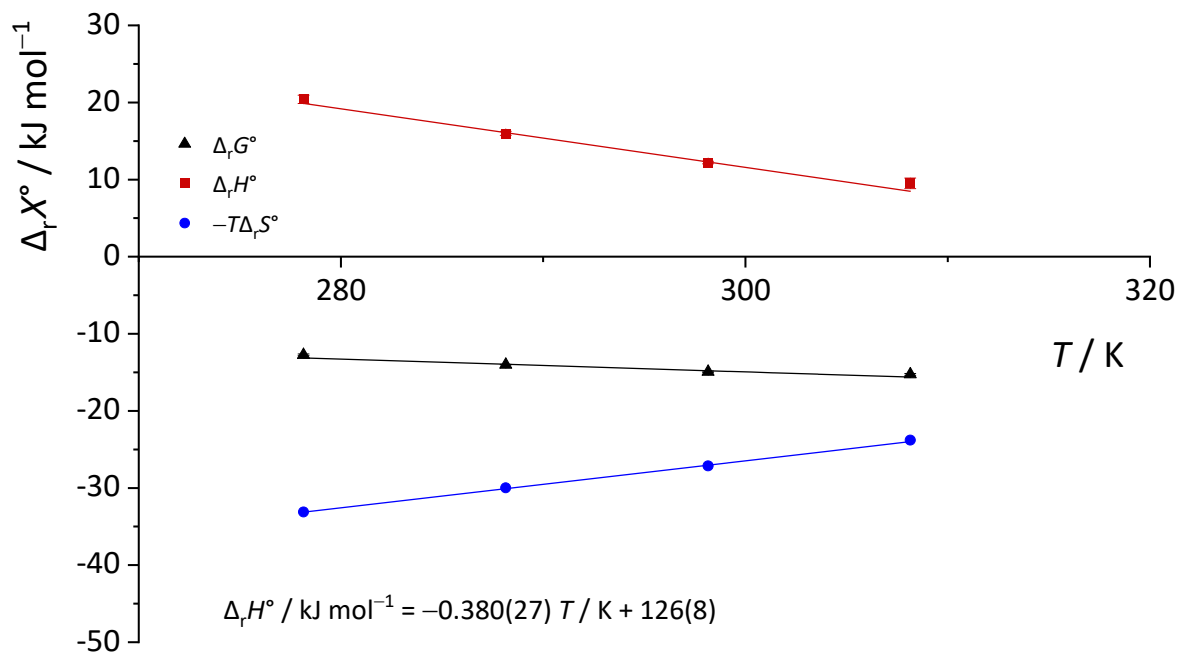

Figure S20. The temperature dependence of standard complexation parameters of 1-AdOH with  $\gamma$ -CD in H<sub>2</sub>O.

### 1-DAOH with $\gamma$ -CD in H<sub>2</sub>O

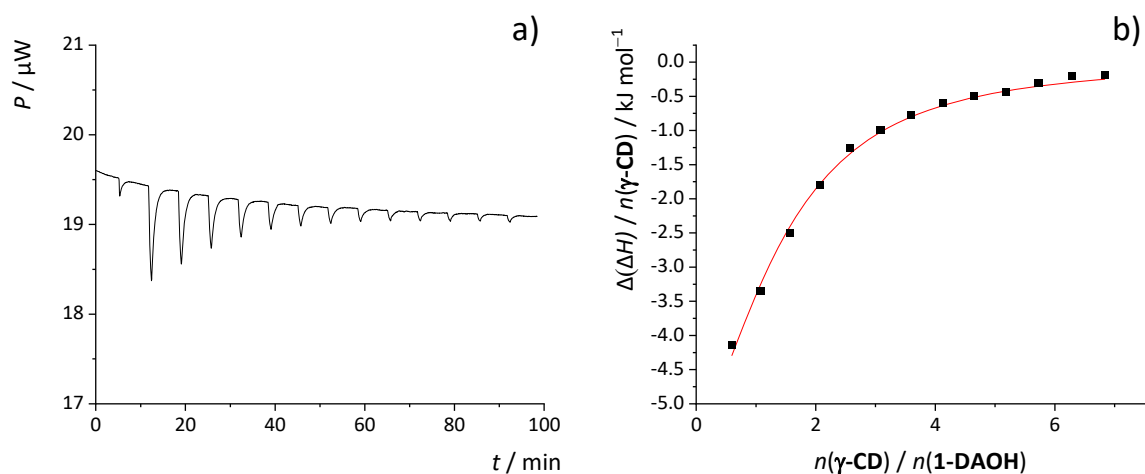

**Figure S21.** Microcalorimetric titration of **1-DAOH** ( $c_0 = 1 \cdot 10^{-5} \text{ mol dm}^{-3}$ ,  $V_0 = 1.45 \text{ mL}$ ) with  $\gamma\text{-CD}$  ( $c = 1 \cdot 10^{-3} \text{ mol dm}^{-3}$ ) in H<sub>2</sub>O at 298 K. a) Thermogram. b) The dependence of normalized successive enthalpy changes on host to guest molar ratio. ■ experimental; – calculated.

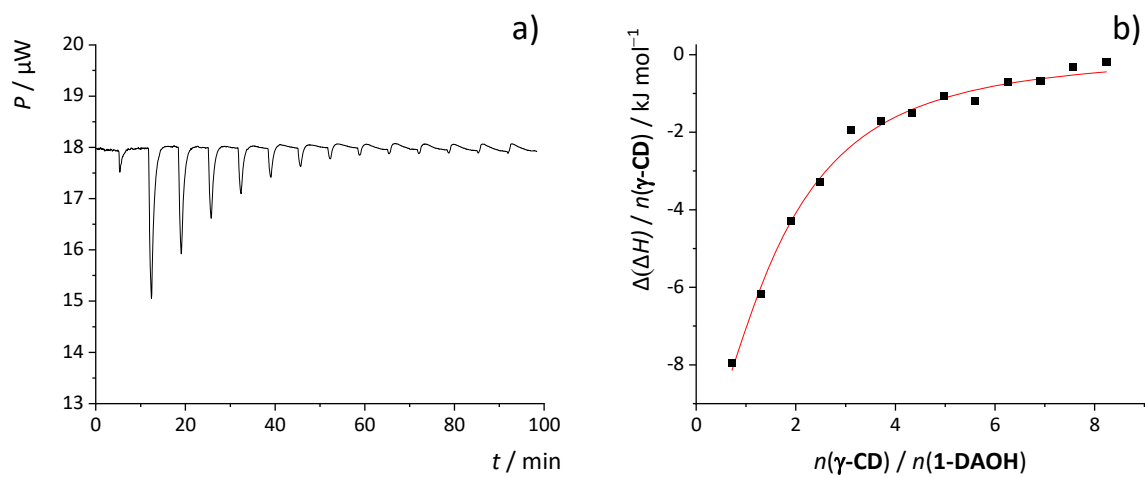

**Figure S22.** Microcalorimetric titration of **1-DAOH** ( $c_0 = 1 \cdot 10^{-5} \text{ mol dm}^{-3}$ ,  $V_0 = 1.45 \text{ mL}$ ) with  $\gamma\text{-CD}$  ( $c = 1 \cdot 10^{-3} \text{ mol dm}^{-3}$ ) in H<sub>2</sub>O at 318 K. a) Thermogram. b) The dependence of normalized successive enthalpy changes on host to guest molar ratio. ■ experimental; – calculated.

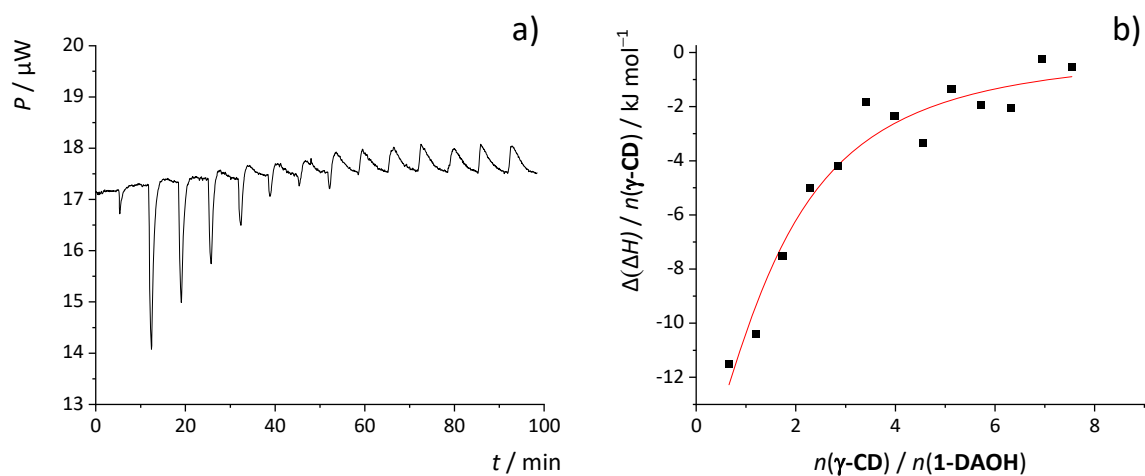

**Figure S23.** Microcalorimetric titration of **1-DAOH** ( $c_0 = 1 \cdot 10^{-5} \text{ mol dm}^{-3}$ ,  $V_0 = 1.45 \text{ mL}$ ) with  $\gamma\text{-CD}$  ( $c = 1 \cdot 10^{-3} \text{ mol dm}^{-3}$ ) in H<sub>2</sub>O at 338 K. a) Thermogram. b) The dependence of normalized successive enthalpy changes on host to guest molar ratio. ■ experimental; – calculated.

4-DAOH with  $\gamma$ -CD in H<sub>2</sub>O

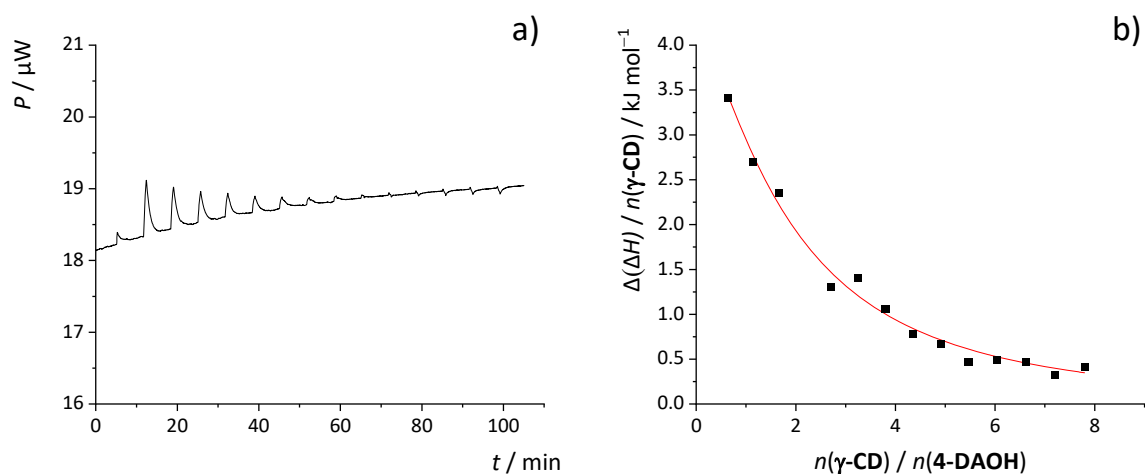

**Figure S24.** Microcalorimetric titration of 4-DAOH ( $c_0 = 1 \cdot 10^{-5} \text{ mol dm}^{-3}$ ,  $V_0 = 1.45 \text{ mL}$ ) with  $\gamma$ -CD ( $c = 1 \cdot 10^{-3} \text{ mol dm}^{-3}$ ) in H<sub>2</sub>O at 278 K. a) Thermogram. b) The dependence of normalized successive enthalpy changes on host to guest molar ratio. ■ experimental; – calculated.

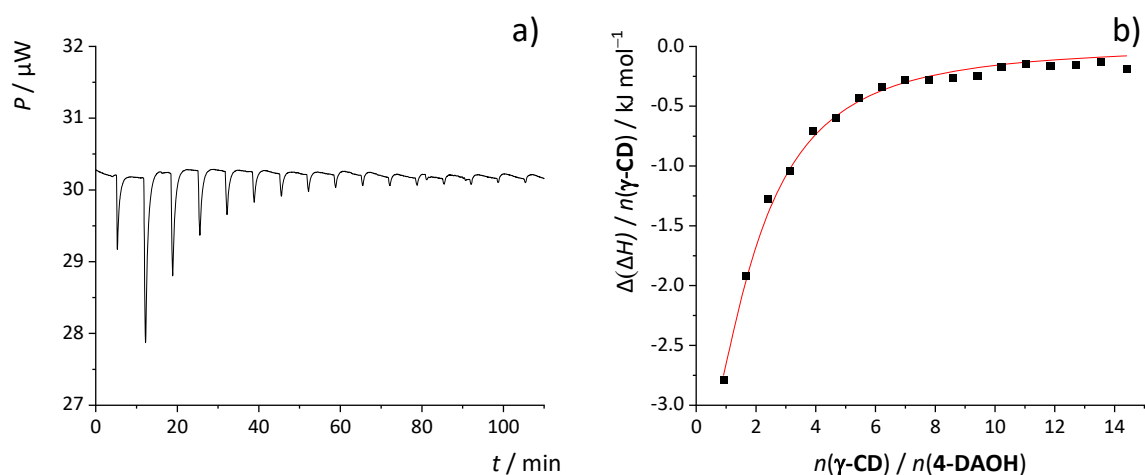

**Figure S25.** Microcalorimetric titration of 4-DAOH ( $c_0 = 4 \cdot 10^{-5} \text{ mol dm}^{-3}$ ,  $V_0 = 1.45 \text{ mL}$ ) with  $\gamma$ -CD ( $c = 3 \cdot 10^{-3} \text{ mol dm}^{-3}$ ) in H<sub>2</sub>O at 318 K. a) Thermogram. b) The dependence of normalized successive enthalpy changes on host to guest molar ratio. ■ experimental; – calculated.

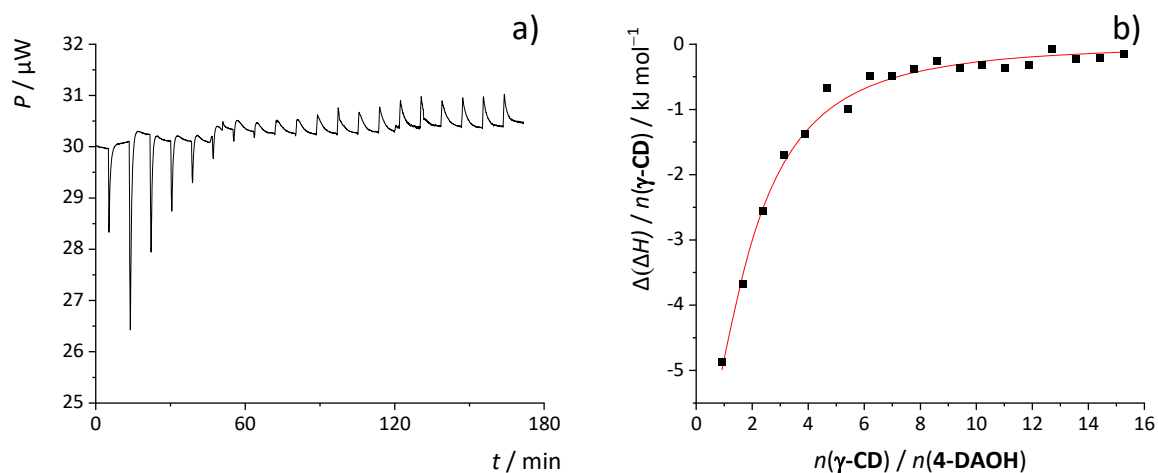

**Figure S26.** Microcalorimetric titration of 4-DAOH ( $c_0 = 4 \cdot 10^{-5} \text{ mol dm}^{-3}$ ,  $V_0 = 1.45 \text{ mL}$ ) with  $\gamma$ -CD ( $c = 3 \cdot 10^{-3} \text{ mol dm}^{-3}$ ) in H<sub>2</sub>O at 338 K. a) Thermogram. b) The dependence of normalized successive enthalpy changes on host to guest molar ratio. ■ experimental; – calculated.

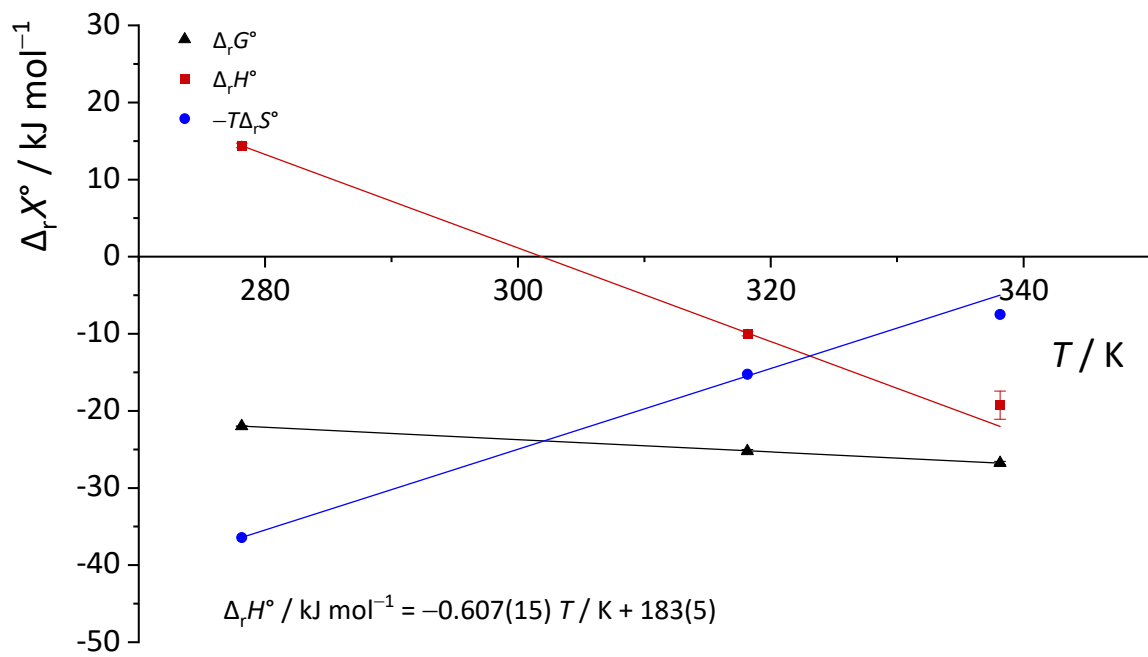

Figure S27. The temperature dependence of standard complexation parameters of 4-DAOH with  $\gamma$ -CD in  $\text{H}_2\text{O}$ .

4,9-DA(OH)<sub>2</sub> with  $\gamma$ -CD in H<sub>2</sub>O

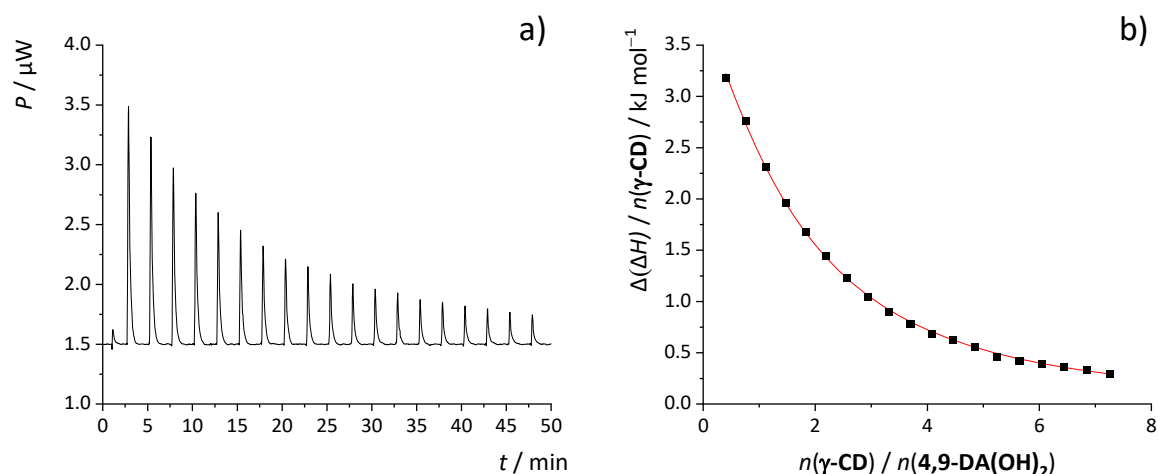

**Figure S28.** Microcalorimetric titration of 4,9-DA(OH)<sub>2</sub> ( $c_0 = 1 \cdot 10^{-4} \text{ mol dm}^{-3}$ ,  $V_0 = 0.205 \text{ mL}$ ) with  $\gamma$ -CD ( $c = 5 \cdot 10^{-3} \text{ mol dm}^{-3}$ ) in H<sub>2</sub>O at 278 K. a) Thermogram. b) The dependence of normalized successive enthalpy changes on host to guest molar ratio. ■ experimental; — calculated.

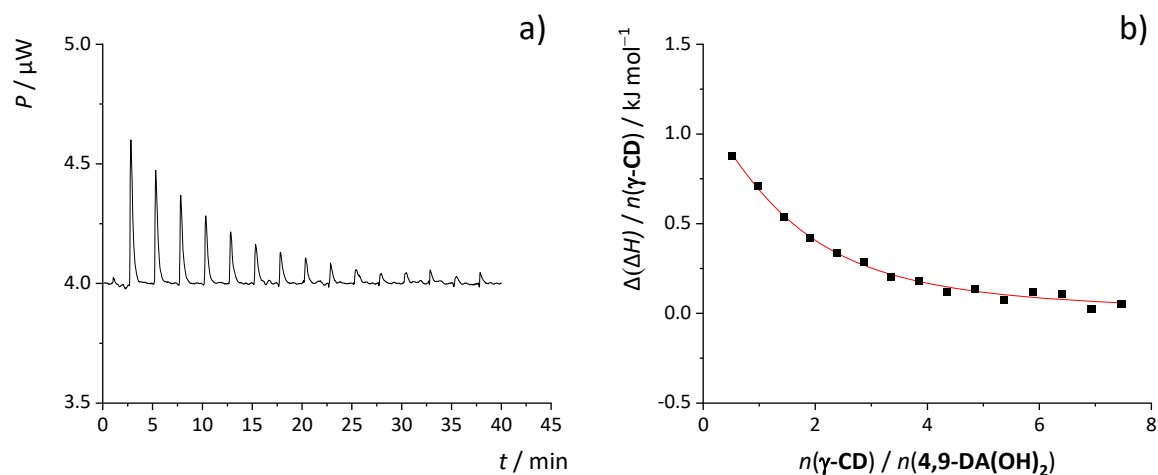

**Figure S29.** Microcalorimetric titration of 4,9-DA(OH)<sub>2</sub> ( $c_0 = 1 \cdot 10^{-4} \text{ mol dm}^{-3}$ ,  $V_0 = 0.205 \text{ mL}$ ) with  $\gamma$ -CD ( $c = 5 \cdot 10^{-3} \text{ mol dm}^{-3}$ ) in H<sub>2</sub>O at 298 K. a) Thermogram. b) The dependence of normalized successive enthalpy changes on host to guest molar ratio. ■ experimental; — calculated.

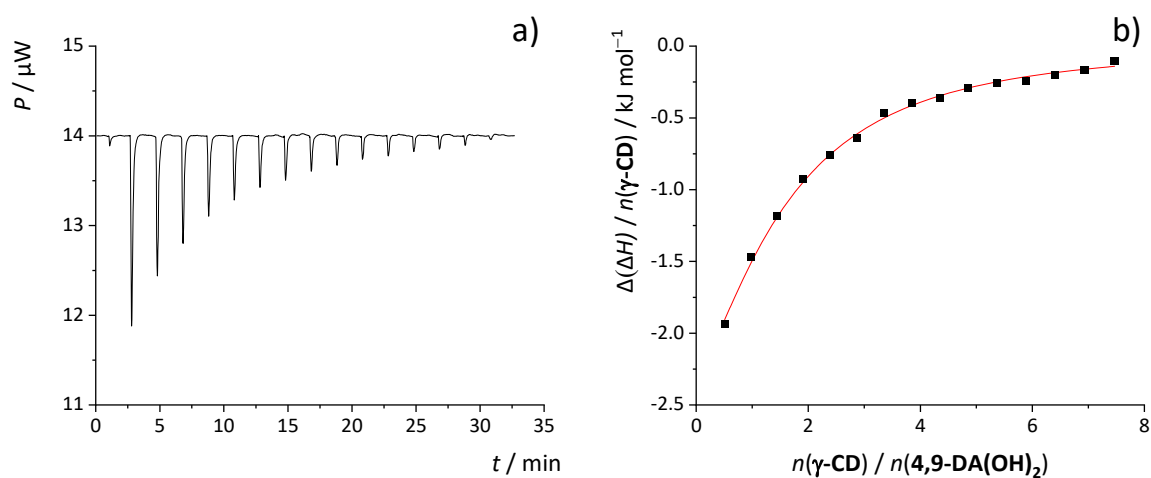

**Figure S30.** Microcalorimetric titration of 4,9-DA(OH)<sub>2</sub> ( $c_0 = 1 \cdot 10^{-4} \text{ mol dm}^{-3}$ ,  $V_0 = 0.205 \text{ mL}$ ) with  $\gamma$ -CD ( $c = 5 \cdot 10^{-3} \text{ mol dm}^{-3}$ ) in H<sub>2</sub>O at 318 K. a) Thermogram. b) The dependence of normalized successive enthalpy changes on host to guest molar ratio. ■ experimental; — calculated.



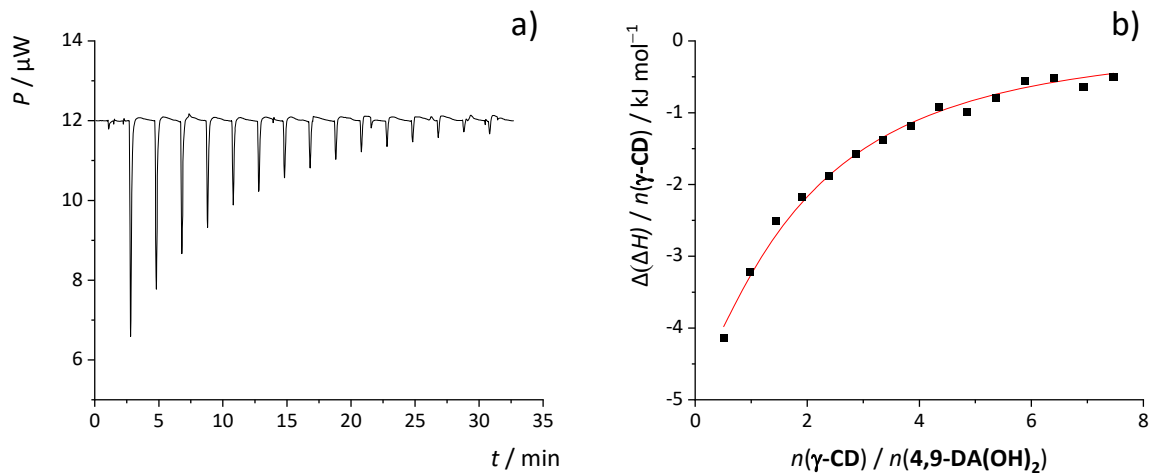

**Figure S31.** Microcalorimetric titration of **4,9-DA(OH)<sub>2</sub>** ( $c_0 = 1 \cdot 10^{-4} \text{ mol dm}^{-3}$ ,  $V_0 = 0.205 \text{ mL}$ ) with  $\gamma\text{-CD}$  ( $c = 5 \cdot 10^{-3} \text{ mol dm}^{-3}$ ) in  $\text{H}_2\text{O}$  at 338 K. a) Thermogram. b) The dependence of normalized successive enthalpy changes on host to guest molar ratio. ■ experimental; — calculated.

**Table S2.** Thermodynamic parameters for complexation of **1-AdOH** and diamantane alcohols with  $\gamma$ -**CD** in H<sub>2</sub>O.<sup>[a]</sup>

| <b>GUEST · <math>\gamma</math>-CD</b> | <i>T</i> / K | log <i>K</i>        | $\Delta_r G^\circ$ / kJ mol <sup>-1</sup> | $\Delta_r H^\circ$ / kJ mol <sup>-1</sup> | $-T\Delta_r S^\circ$ / kJ mol <sup>-1</sup> | $\Delta_r C_p^\circ$ / J K <sup>-1</sup> mol <sup>-1</sup> |
|---------------------------------------|--------------|---------------------|-------------------------------------------|-------------------------------------------|---------------------------------------------|------------------------------------------------------------|
| <b>1-AdOH</b>                         | 278          | 2.39(2)             | -12.7(1)                                  | 20.4(5)                                   | -33.1(4)                                    | -380(27)                                                   |
|                                       | 288          | 2.54(1)             | -14.00(3)                                 | 16.0(3)                                   | -30.0(4)                                    |                                                            |
|                                       | 298          | 2.62(1)             | -19.9(1)                                  | 12.2(2)                                   | -27.1(1)                                    |                                                            |
|                                       | 308          | 2.59(2)             | -15.3(1)                                  | 9.5(7)                                    | -23.8(2)                                    |                                                            |
| <b>1-DAOH</b>                         | 278          |                     |                                           | ≈ 0                                       |                                             | -715(37)                                                   |
|                                       | 298          | 4.48(1)             | -25.57(5)                                 | -10.8(2)                                  | -14.7(2)                                    |                                                            |
|                                       | 318          | 4.36(1)             | -26.56(5)                                 | -24.6(2)                                  | -2.0(3)                                     |                                                            |
|                                       | 338          | 4.25(5)             | -27.5(2)                                  | -40.7(6)                                  | 13.1(8)                                     |                                                            |
| <b>4-DAOH</b>                         | 278          | 4.13(1)             | -21.98(2)                                 | 14.4(3)                                   | -36.4(3)                                    | -607(15)                                                   |
|                                       | 298          | 4.14 <sup>[b]</sup> | -23.6 <sup>[b]</sup>                      | 2.25 <sup>[b]</sup>                       | -25.9 <sup>[b]</sup>                        |                                                            |
|                                       | 318          | 4.14(3)             | -25.2(2)                                  | -10.0(3)                                  | -15.3(5)                                    |                                                            |
|                                       | 338          | 4.13(3)             | -26.7(2)                                  | -19(2)                                    | -8(2)                                       |                                                            |
| <b>4,9-DA(OH)<sub>2</sub></b>         | 278          | 3.54(1)             | -18.83(1)                                 | 11.27(3)                                  | -30.13(3)                                   | -440(11)                                                   |
|                                       | 298          | 3.64(3)             | -20.8(2)                                  | 2.76(7)                                   | -23.5(1)                                    |                                                            |
|                                       | 318          | 3.53(4)             | -21.5(2)                                  | -6.8(3)                                   | -14.8(5)                                    |                                                            |
|                                       | 338          | 3.47(2)             | -22.5(1)                                  | -16.1(3)                                  | -6.4(4)                                     |                                                            |

[a] Uncertainties of the last digit(s) are given in parentheses as standard errors of the mean ( $N = 3-5$ ), or standard deviations obtained by weighted linear regression analysis (for  $\Delta_r C_p^\circ$  values); [b] obtained by interpolation based on herein determined temperature dependence of thermodynamic complexation parameters.

Even though larger thermal noise was in some cases associated with experiments carried out at 278 and 338 K, or that complexation enthalpy was occasionally close to zero, the obtained linear  $\Delta_r H^\circ(T)$  dependencies and the standard errors of the mean obtained by repetitive titration experiments indicate the reliability of determined thermodynamic complexation parameters.

## 2D NMR Spectra of investigated host-guest systems

a)

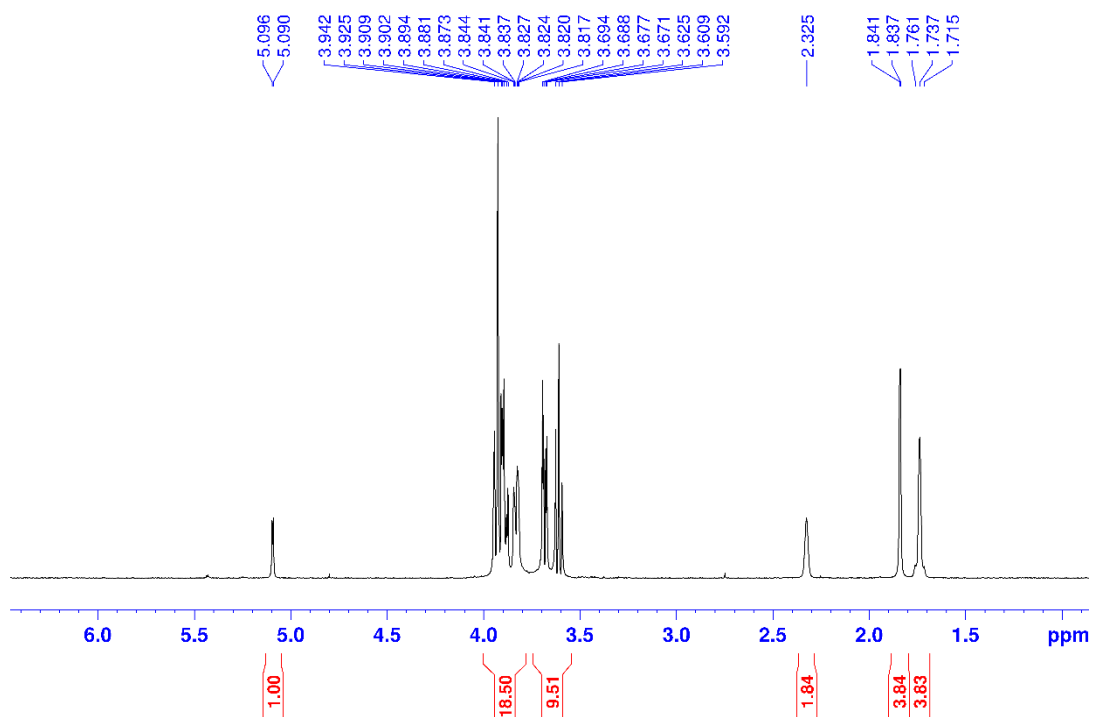

b)

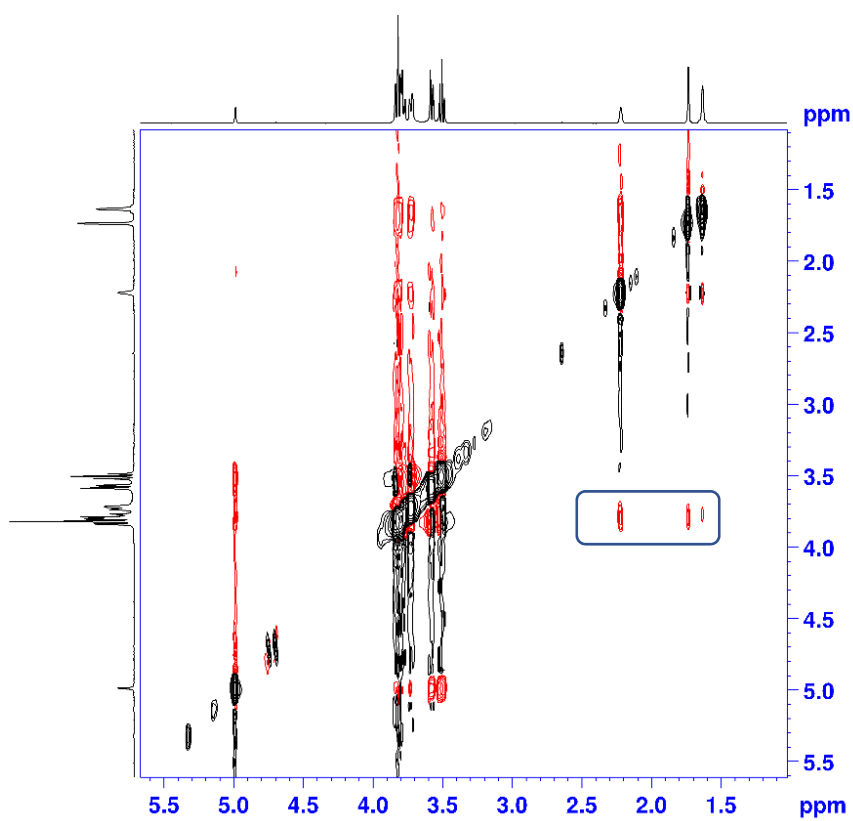

**Figure S32.** a) 600 MHz  $^1\text{H}$  NMR spectrum with water suppression of **1-AdOH**· $\beta$ -**CD** in  $\text{D}_2\text{O}$ . b) Contour plot of the ROESY  $^1\text{H}$  NMR spectrum of the reaction mixture containing **1-AdOH** ( $c = 5 \cdot 10^{-3} \text{ mol dm}^{-3}$ ) and  $\beta$ -**CD** ( $c = 2 \cdot 10^{-3} \text{ mol dm}^{-3}$ ) at 298 K in  $\text{D}_2\text{O}$ .

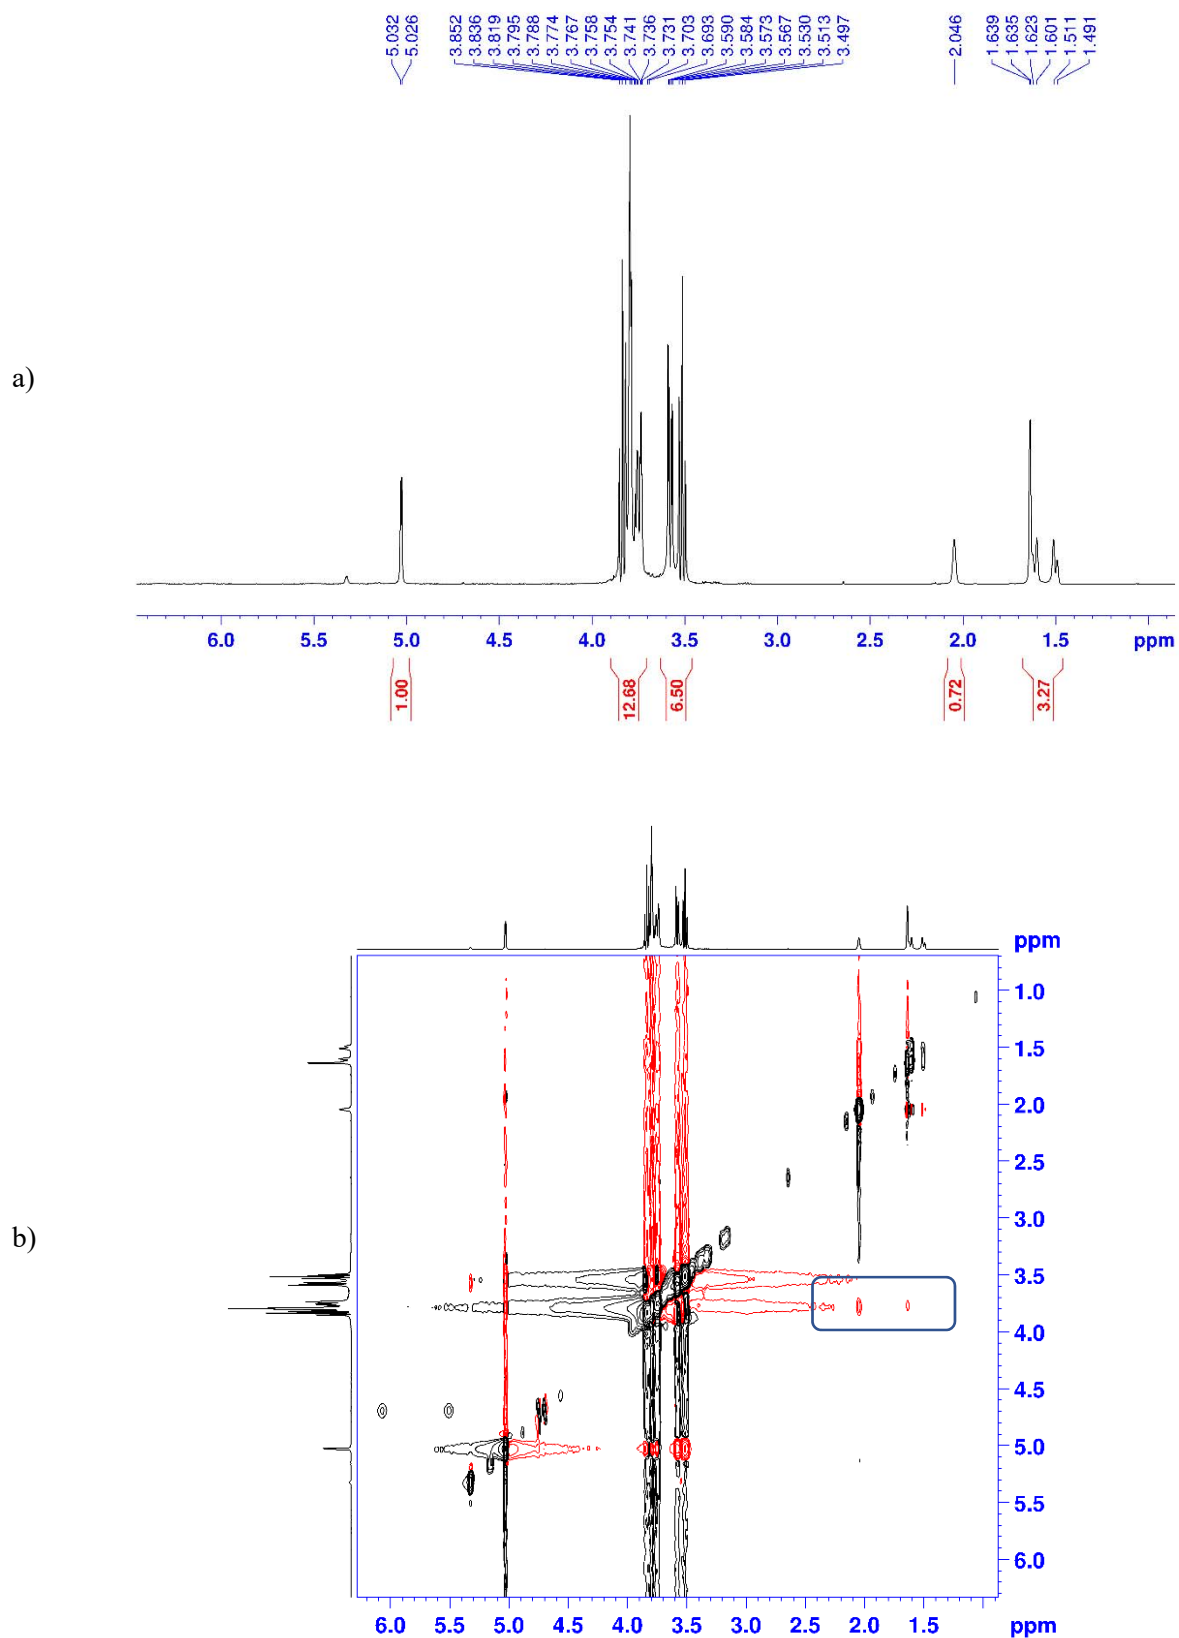

**Figure S33.** a) 600 MHz  $^1\text{H}$  NMR spectrum with water suppression of  $1\text{-AdOH}\cdot\gamma\text{-CD}$  in  $\text{D}_2\text{O}$ . Contour plot of the ROESY  $^1\text{H}$  NMR spectrum of the reaction mixture containing  $1\text{-AdOH}$  ( $c = 3 \cdot 10^{-3} \text{ mol dm}^{-3}$ ) and  $\gamma\text{-CD}$  ( $c = 4 \cdot 10^{-3} \text{ mol dm}^{-3}$ ) at 298 K in  $\text{D}_2\text{O}$ .

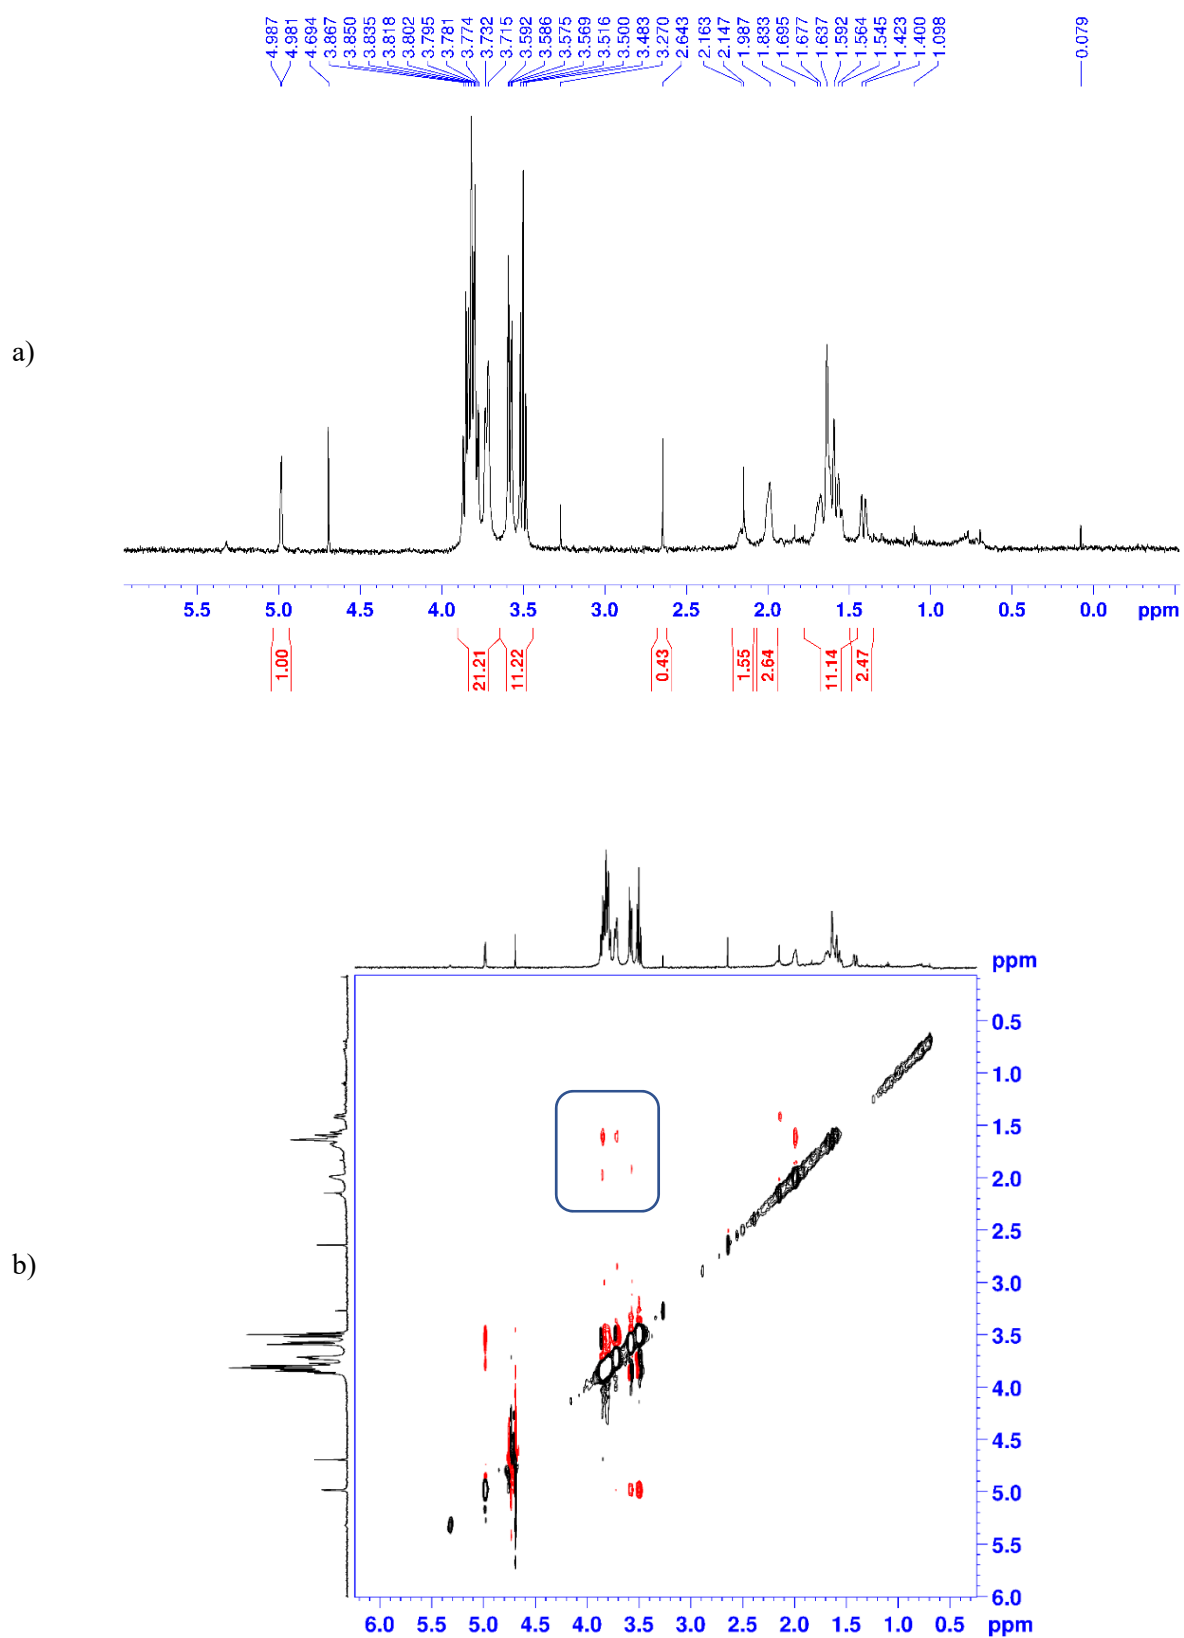

**Figure S34.** a) 600 MHz  $^1\text{H}$  NMR spectrum with water suppression of **1-DAOH** ·  $\beta$ -**CD** in  $\text{D}_2\text{O}$ . b) Contour plot of the ROESY  $^1\text{H}$  NMR spectrum of the reaction mixture containing **1-DAOH** ( $c = 1.6 \cdot 10^{-3} \text{ mol dm}^{-3}$ ) and  $\beta$ -**CD** ( $c = 1.9 \cdot 10^{-3} \text{ mol dm}^{-3}$ ) at 298 K in  $\text{D}_2\text{O}$ .

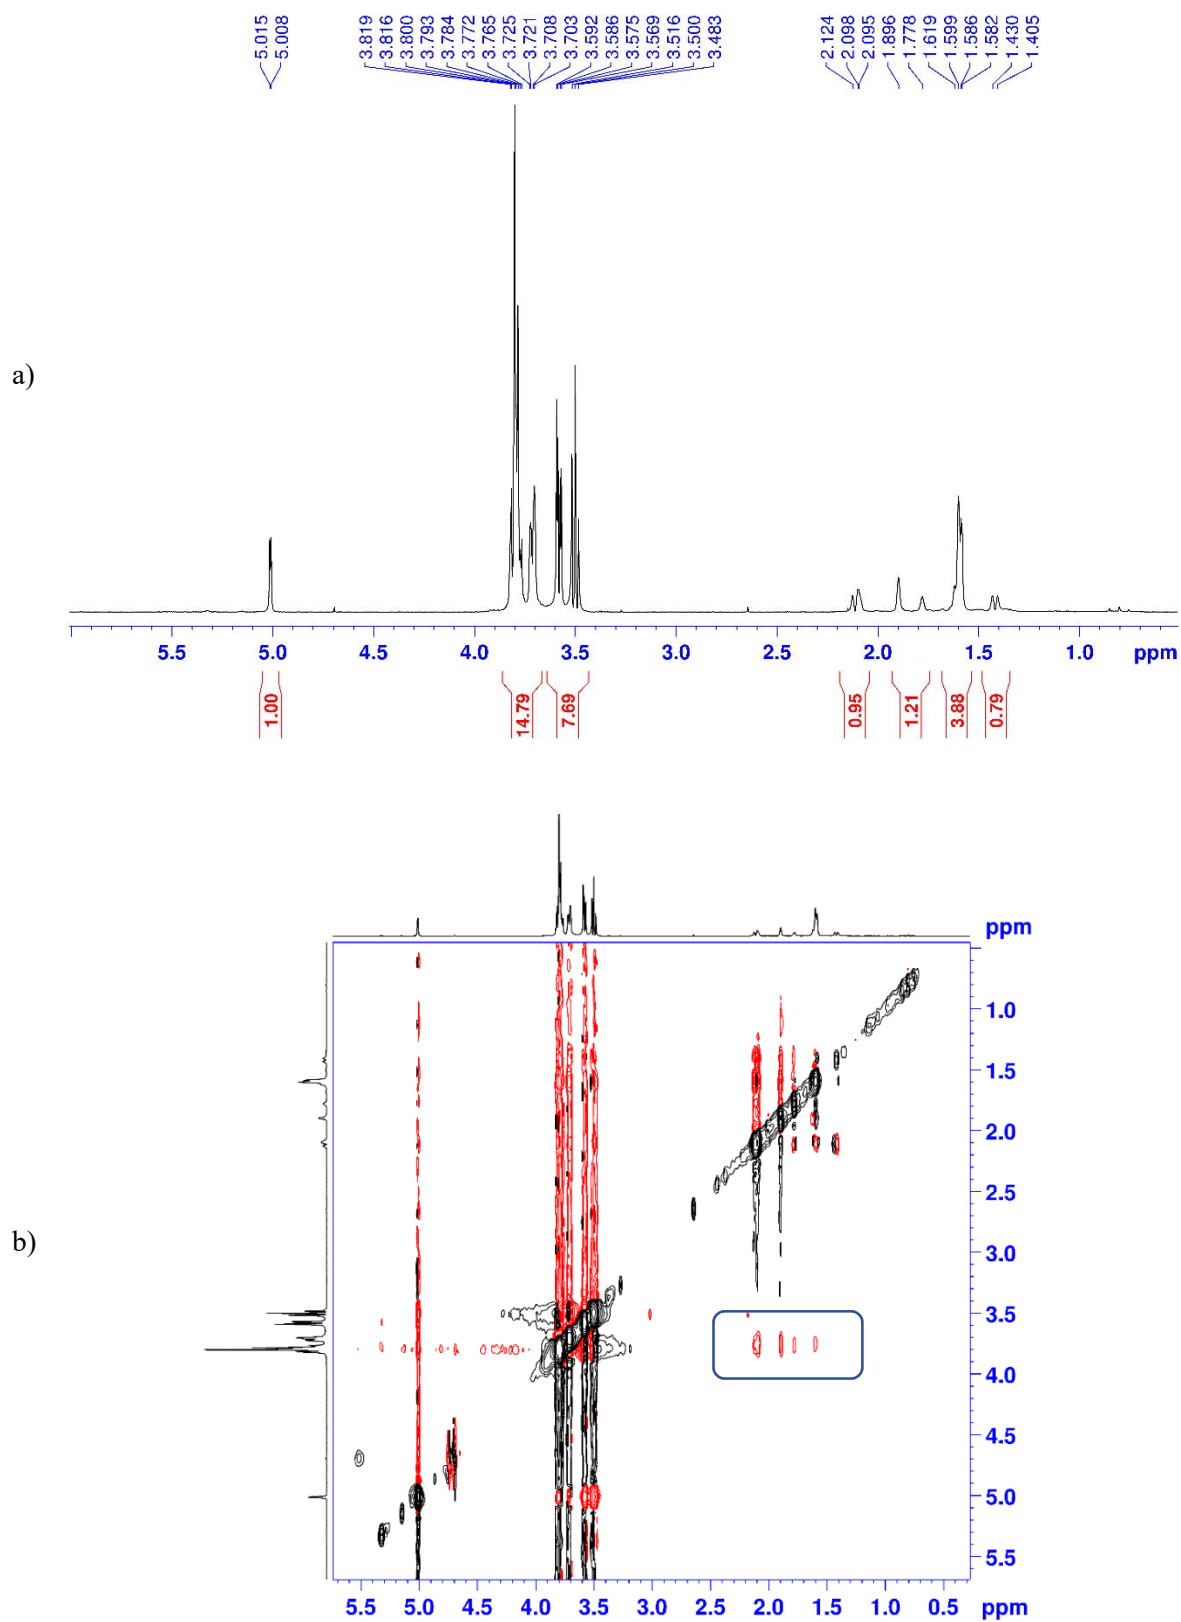

**Figure S35.** a) 600 MHz  $^1\text{H}$  NMR spectrum with water suppression of **1-DAOH**· $\gamma$ -**CD** in  $\text{D}_2\text{O}$ . b) Contour plot of the ROESY  $^1\text{H}$  NMR spectrum of the reaction mixture containing **1-DAOH** ( $c = 1.9 \cdot 10^{-3} \text{ mol dm}^{-3}$ ) and  $\gamma$ -**CD** ( $c = 2 \cdot 10^{-3} \text{ mol dm}^{-3}$ ) at 298 K in  $\text{D}_2\text{O}$ .

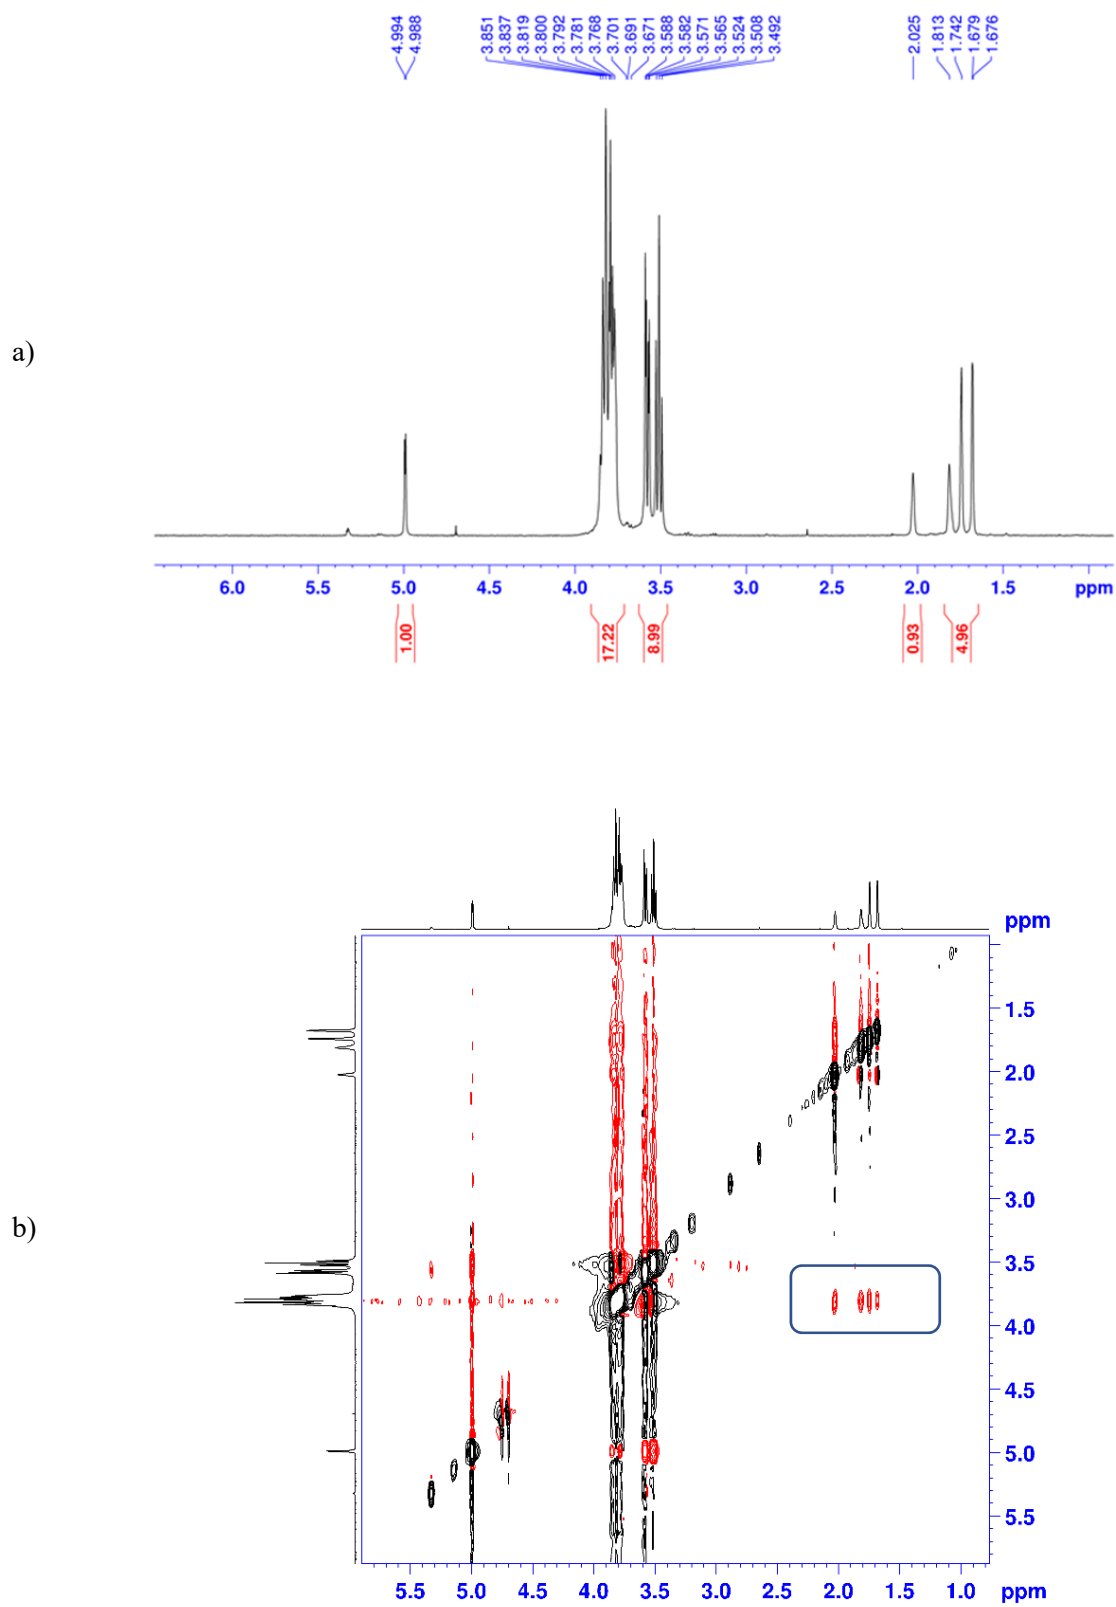

**Figure S36.** a) 600 MHz  $^1\text{H}$  NMR spectrum with water suppression of **4-DAOH**· $\beta$ -**CD** in  $\text{D}_2\text{O}$ . b) Contour plot of the ROESY  $^1\text{H}$  NMR spectrum of the reaction mixture containing **4-DAOH** ( $c = 9 \cdot 10^{-4} \text{ mol dm}^{-3}$ ) and  $\beta$ -**CD** ( $c = 1 \cdot 10^{-3} \text{ mol dm}^{-3}$ ) at 298 K in  $\text{D}_2\text{O}$ .

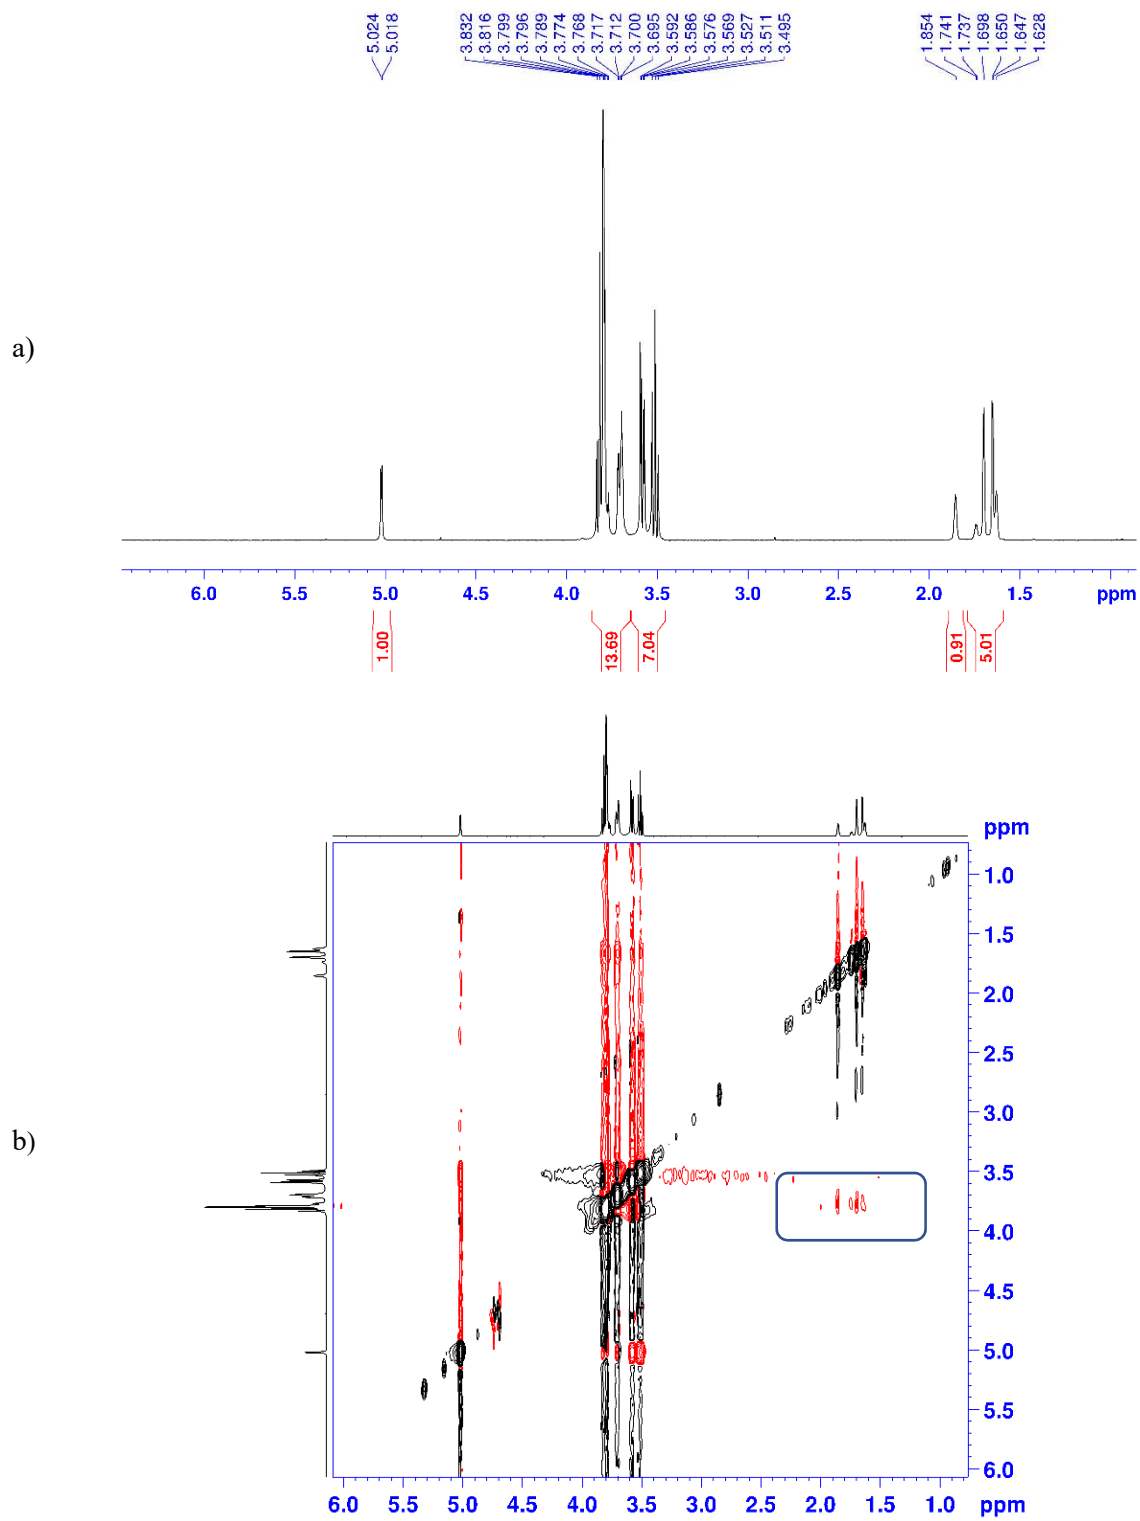

**Figure S37.** A) 600 MHz  $^1\text{H}$  NMR spectrum with water suppression of **4-DAOH**  $\cdot$   $\gamma$ -**CD** in  $\text{D}_2\text{O}$ . B) Contour plot of the ROESY  $^1\text{H}$  NMR spectrum of the reaction mixture containing **4-DAOH** ( $c = 1 \cdot 10^{-3} \text{ mol dm}^{-3}$ ) and  $\gamma$ -**CD** ( $c = 1.4 \cdot 10^{-3} \text{ mol dm}^{-3}$ ) at 298 K in  $\text{D}_2\text{O}$ .



a)

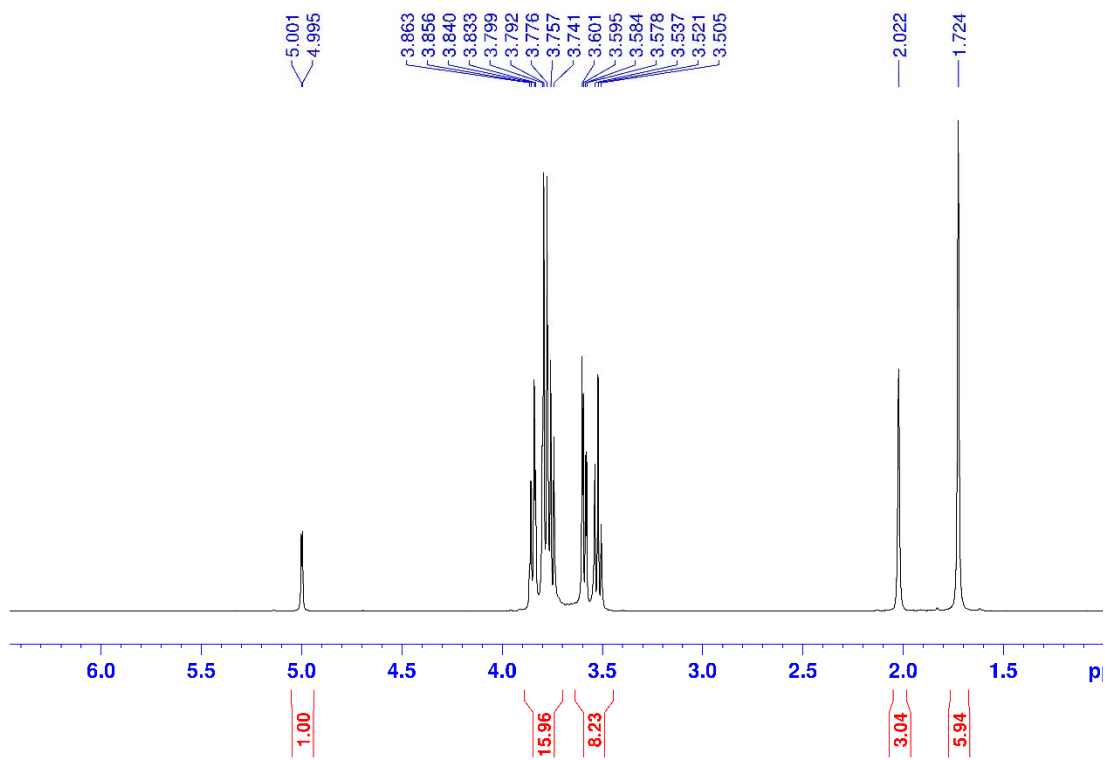

b)

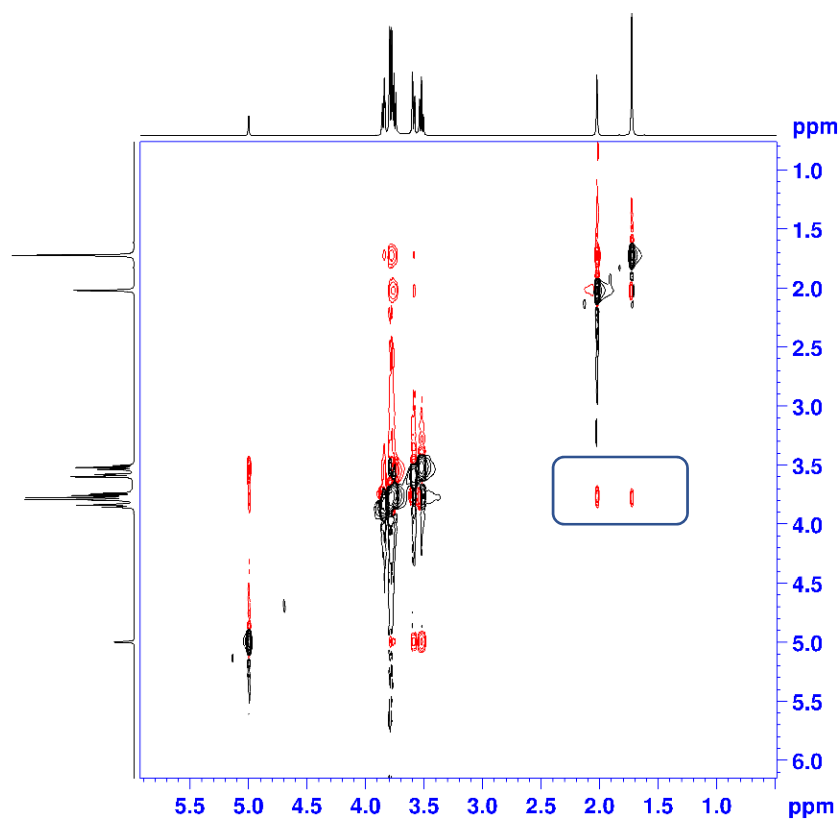

**Figure S38.** a) 600 MHz  $^1\text{H}$  NMR spectrum with water suppression of **4,9-DA(OH)<sub>2</sub>· $\beta$ -CD** in  $\text{D}_2\text{O}$ . b) Contour plot of the ROESY  $^1\text{H}$  NMR spectrum of the reaction mixture containing **4,9-DA(OH)<sub>2</sub>** ( $c = 4 \cdot 10^{-3} \text{ mol dm}^{-3}$ ) and  **$\beta$ -CD** ( $c = 5 \cdot 10^{-3} \text{ mol dm}^{-3}$ ) at 298 K in  $\text{D}_2\text{O}$ .

a)

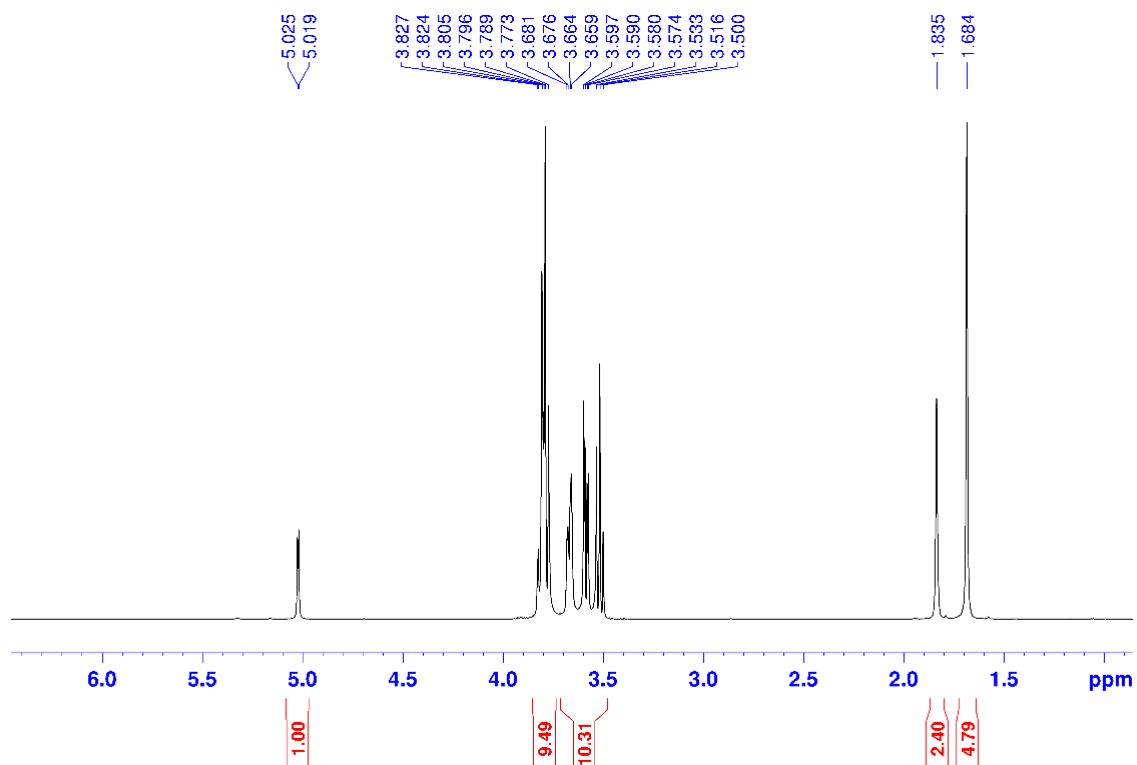

b)

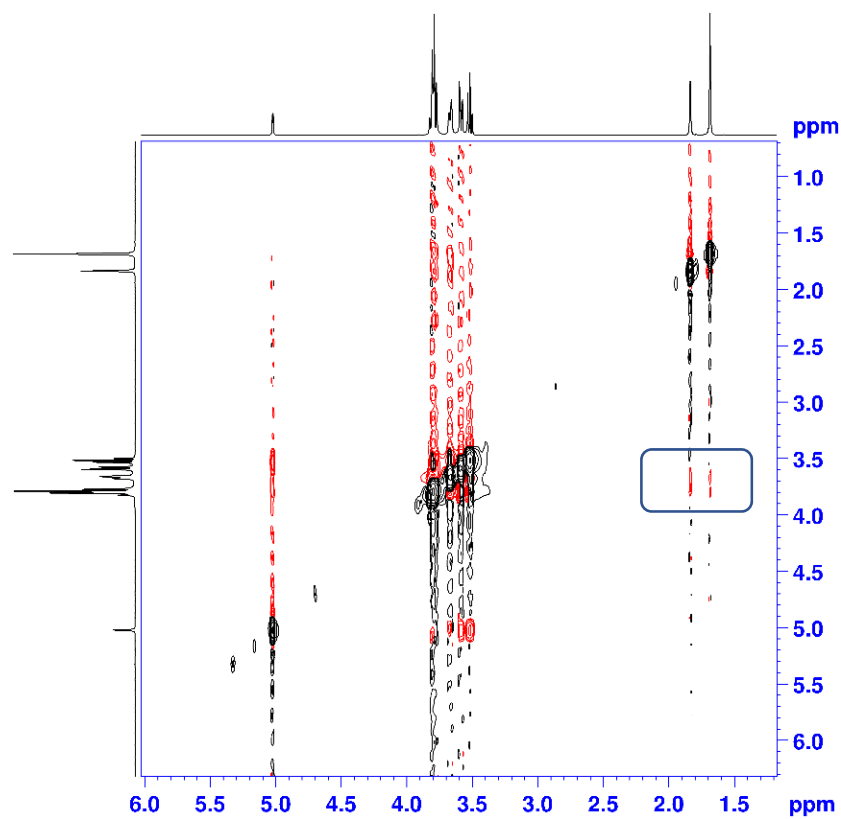

**Figure S39.** a) 600 MHz  $^1\text{H}$  NMR spectrum with water suppression of **4,9-DA(OH)<sub>2</sub>- $\gamma$ -CD** in  $\text{D}_2\text{O}$ . b) Contour plot of the ROESY  $^1\text{H}$  NMR spectrum of the reaction mixture containing **4-DAOH** ( $c = 3 \cdot 10^{-3} \text{ mol dm}^{-3}$ ) and  **$\gamma$ -CD** ( $c = 5 \cdot 10^{-3} \text{ mol dm}^{-3}$ ) at 298 K in  $\text{D}_2\text{O}$

## Minimized geometries obtained by CREST computations

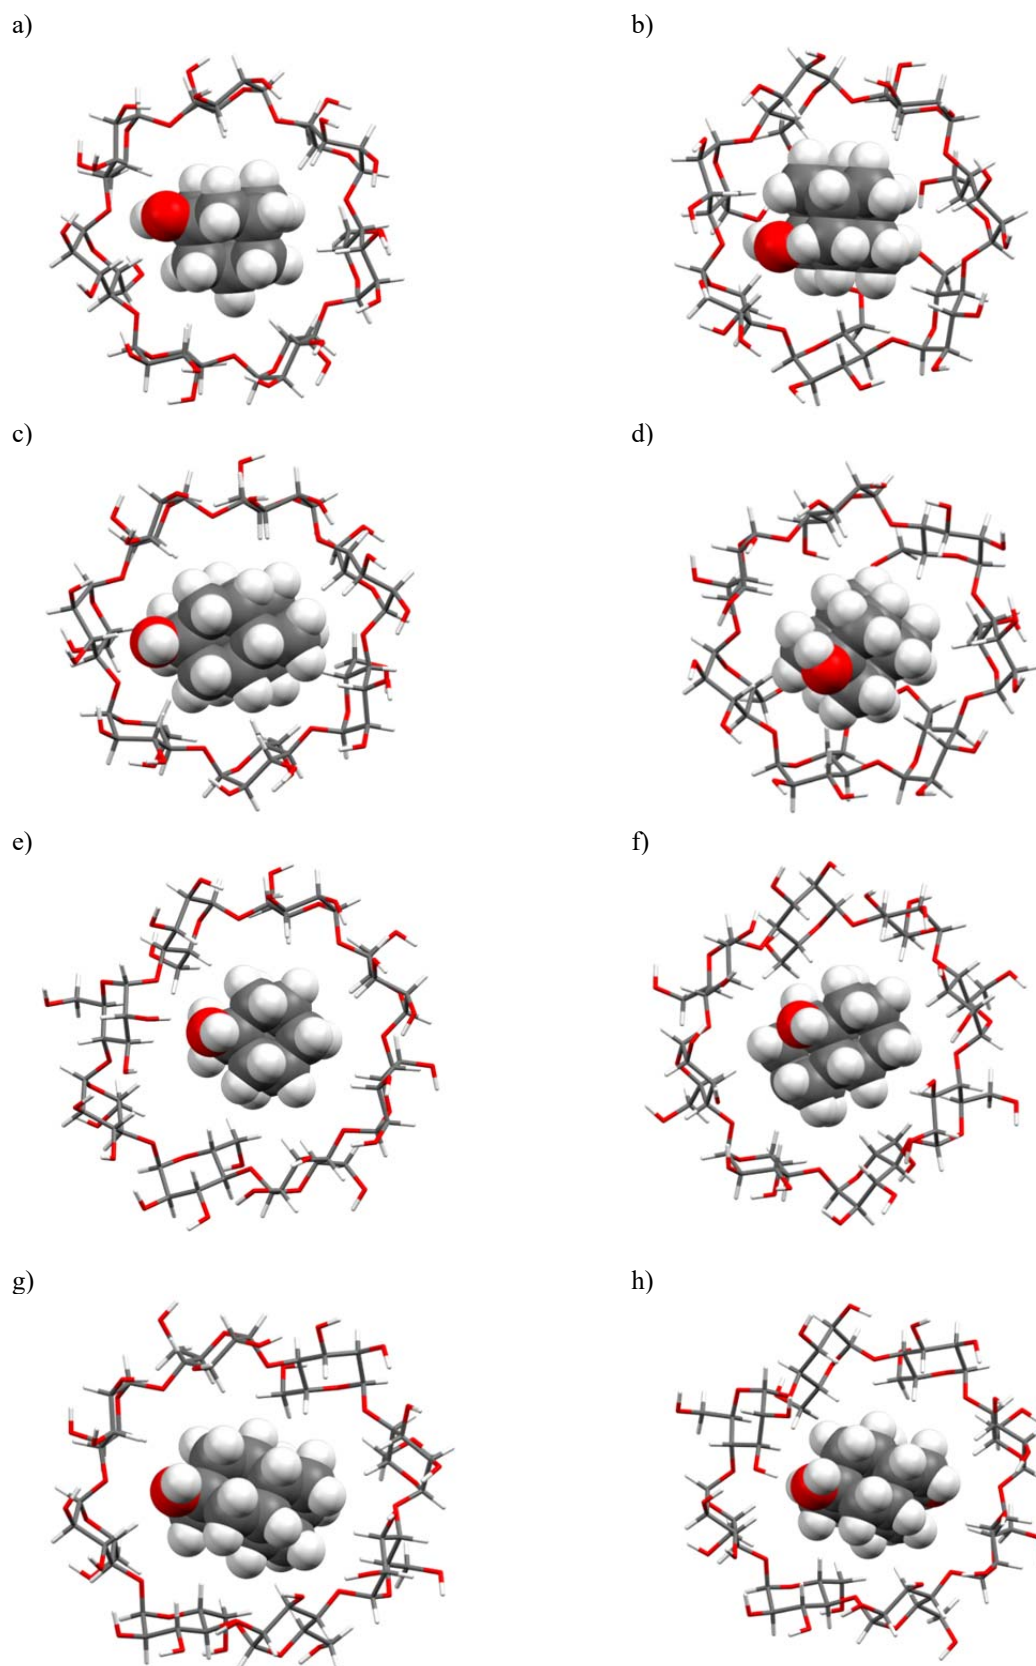

**Figure S40.** Representations of the minimized geometries of the studied CD complexes with diamondoid alcohols (top view): a) 1-AdOH- $\beta$ -CD; b) 1-DAOH- $\beta$ -CD; c) 4-DAOH- $\beta$ -CD; and d) 4,9-DA(OH)<sub>2</sub>- $\beta$ -CD; e) 1-AdOH- $\gamma$ -CD; f) 1-DAOH- $\gamma$ -CD; g) 4-DAOH- $\gamma$ -CD; and h) 4,9-DA(OH)<sub>2</sub>- $\gamma$ -CD.

## Microcalorimetric titrations in water: Cucurbiturils

### 1-DAOH with CB[7] in H<sub>2</sub>O

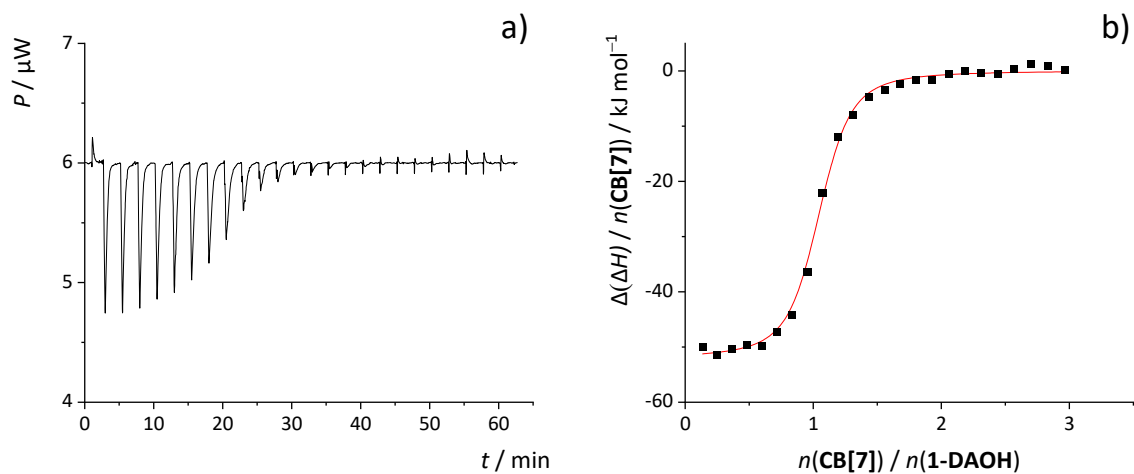

**Figure S41.** Microcalorimetric titration of **1-DAOH** ( $c_0 = 3 \cdot 10^{-5} \text{ mol dm}^{-3}$ ,  $V_0 = 0.205 \text{ mL}$ ) with **CB[7]** ( $c = 4 \cdot 10^{-4} \text{ mol dm}^{-3}$ ) in H<sub>2</sub>O at 278 K. a) Thermogram. b) The dependence of normalized successive enthalpy changes on host to guest molar ratio. ■ experimental; — calculated.

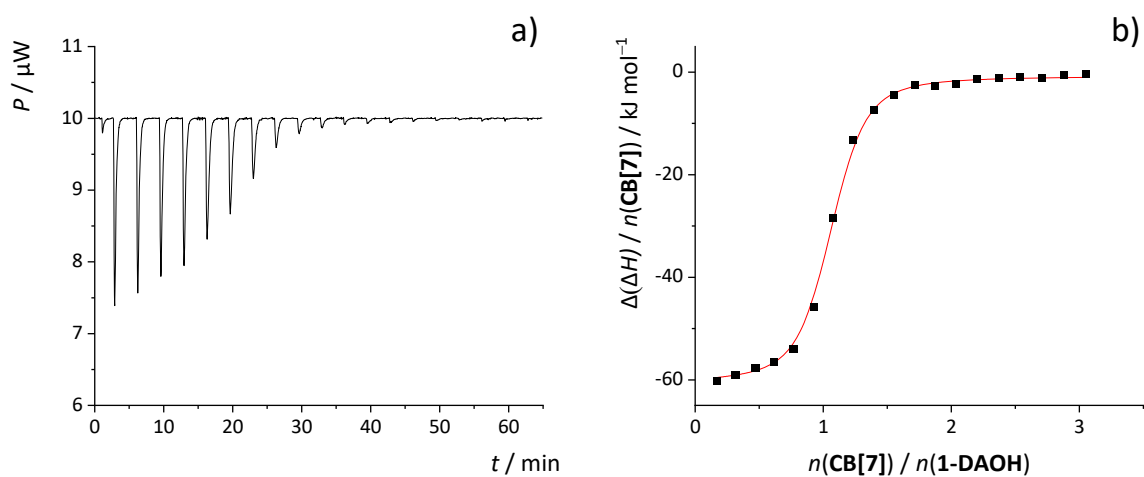

**Figure S42.** Microcalorimetric titration of **1-DAOH** ( $c_0 = 3 \cdot 10^{-5} \text{ mol dm}^{-3}$ ,  $V_0 = 0.205 \text{ mL}$ ) with **CB[7]** ( $c = 4 \cdot 10^{-4} \text{ mol dm}^{-3}$ ) in H<sub>2</sub>O at 298 K. a) Thermogram. b) The dependence of normalized successive enthalpy changes on host to guest molar ratio. ■ experimental; — calculated.

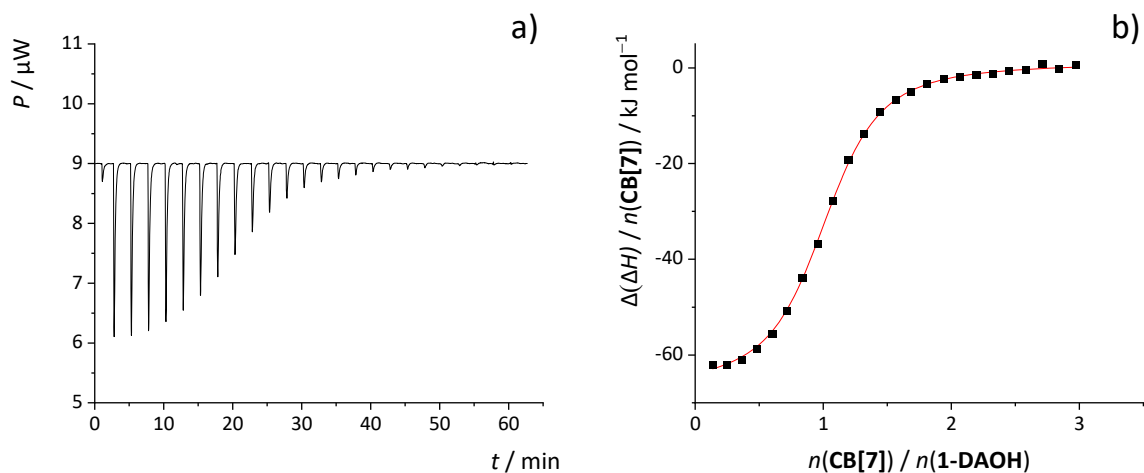

**Figure S43.** Microcalorimetric titration of **1-DAOH** ( $c_0 = 3 \cdot 10^{-5} \text{ mol dm}^{-3}$ ,  $V_0 = 0.205 \text{ mL}$ ) with **CB[7]** ( $c = 4 \cdot 10^{-4} \text{ mol dm}^{-3}$ ) in  $\text{H}_2\text{O}$  at 318 K. a) Thermogram. b) The dependence of normalized successive enthalpy changes on host to guest molar ratio. ■ experimental; — calculated.

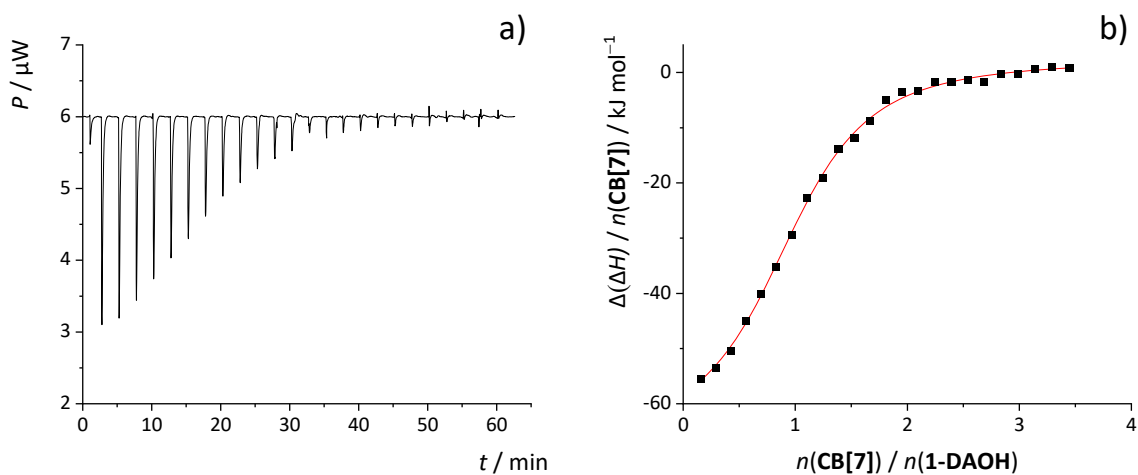

**Figure S44.** Microcalorimetric titration of **1-DAOH** ( $c_0 = 3 \cdot 10^{-5} \text{ mol dm}^{-3}$ ,  $V_0 = 0.205 \text{ mL}$ ) with **CB[7]** ( $c = 4 \cdot 10^{-4} \text{ mol dm}^{-3}$ ) in  $\text{H}_2\text{O}$  at 338 K. a) Thermogram. b) The dependence of normalized successive enthalpy changes on host to guest molar ratio. ■ experimental; — calculated.

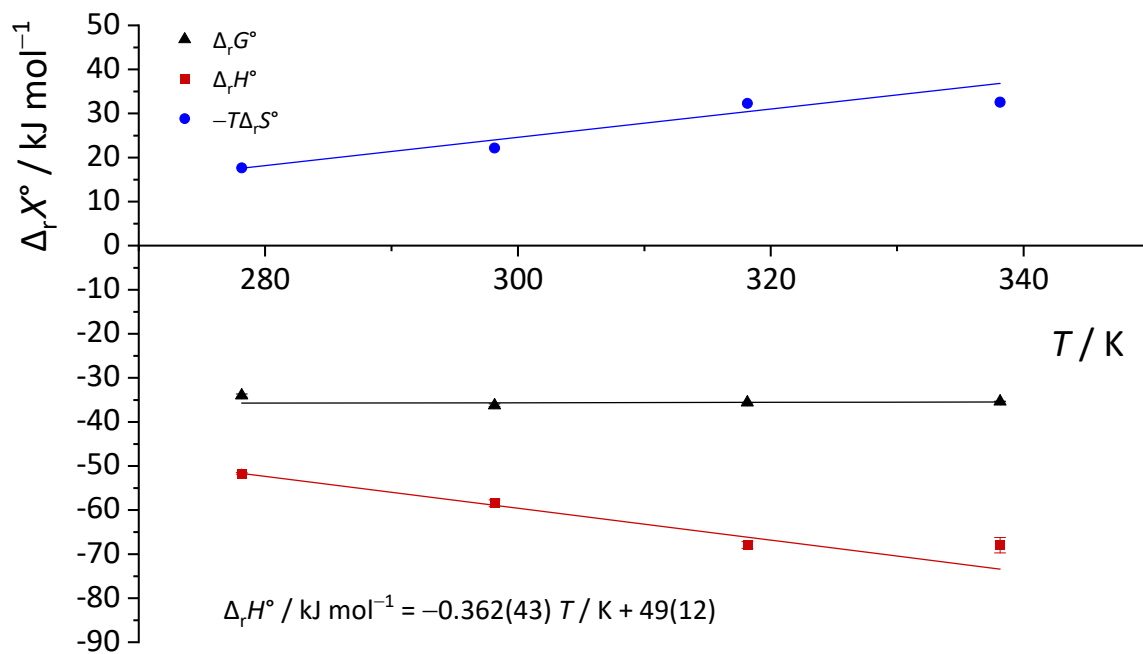

Figure S45. The temperature dependence of standard complexation parameters of 1-DAOH with CB[7] in H<sub>2</sub>O.

4-DAOH with CB[7] in H<sub>2</sub>O

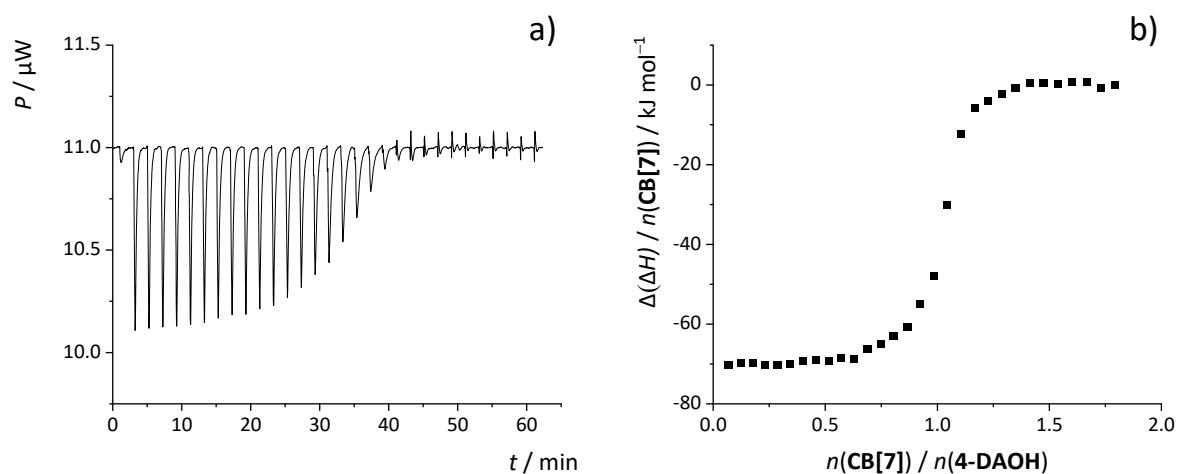

**Figure S46.** Microcalorimetric titration of **4-DAOH** ( $c_0 = 2 \cdot 10^{-5} \text{ mol dm}^{-3}$ ,  $V_0 = 0.205 \text{ mL}$ ) with **CB[7]** ( $c = 2 \cdot 10^{-4} \text{ mol dm}^{-3}$ ) in H<sub>2</sub>O at 278 K. a) Thermogram. b) The dependence of normalized successive enthalpy changes on host to guest molar ratio.

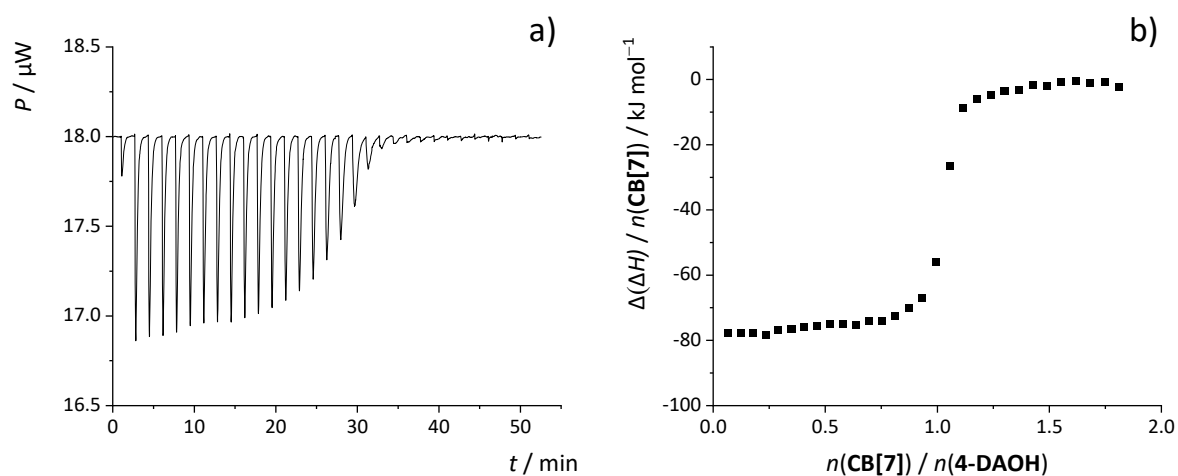

**Figure S47.** Microcalorimetric titration of **4-DAOH** ( $c_0 = 2 \cdot 10^{-5} \text{ mol dm}^{-3}$ ,  $V_0 = 0.205 \text{ mL}$ ) with **CB[7]** ( $c = 2 \cdot 10^{-4} \text{ mol dm}^{-3}$ ) in H<sub>2</sub>O at 298 K. a) Thermogram. b) The dependence of normalized successive enthalpy changes on host to guest molar ratio.

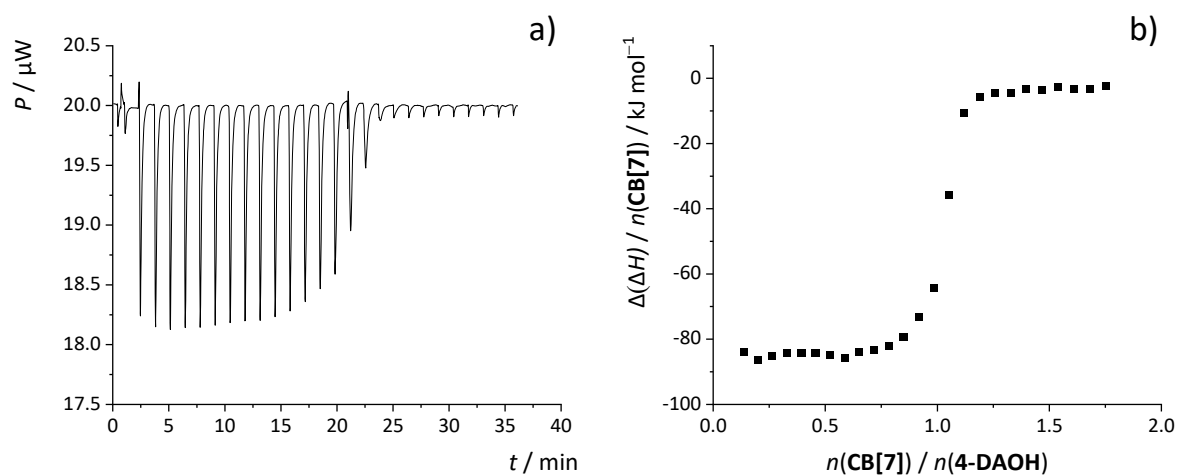

**Figure S48.** Microcalorimetric titration of **4-DAOH** ( $c_0 = 2 \cdot 10^{-5} \text{ mol dm}^{-3}$ ,  $V_0 = 0.205 \text{ mL}$ ) with **CB[7]** ( $c = 2 \cdot 10^{-4} \text{ mol dm}^{-3}$ ) in H<sub>2</sub>O at 318 K. a) Thermogram. b) The dependence of normalized successive enthalpy changes on host to guest molar ratio.

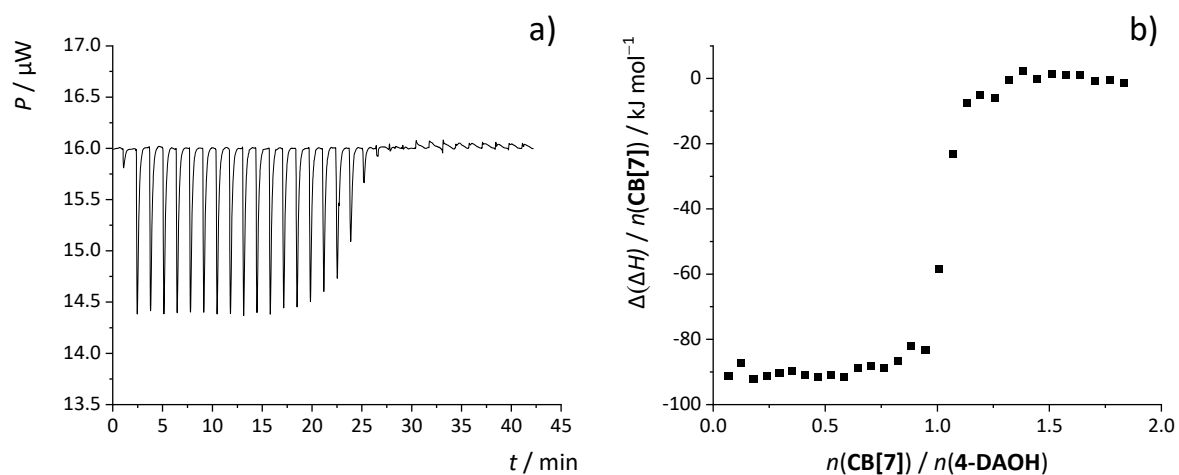

**Figure S49.** Microcalorimetric titration of **4-DAOH** ( $c_0 = 2 \cdot 10^{-5} \text{ mol dm}^{-3}$ ,  $V_0 = 0.205 \text{ mL}$ ) with **CB[7]** ( $c = 2 \cdot 10^{-4} \text{ mol dm}^{-3}$ ) in  $\text{H}_2\text{O}$  at 338 K. a) Thermogram. b) The dependence of normalized successive enthalpy changes on host to guest molar ratio.

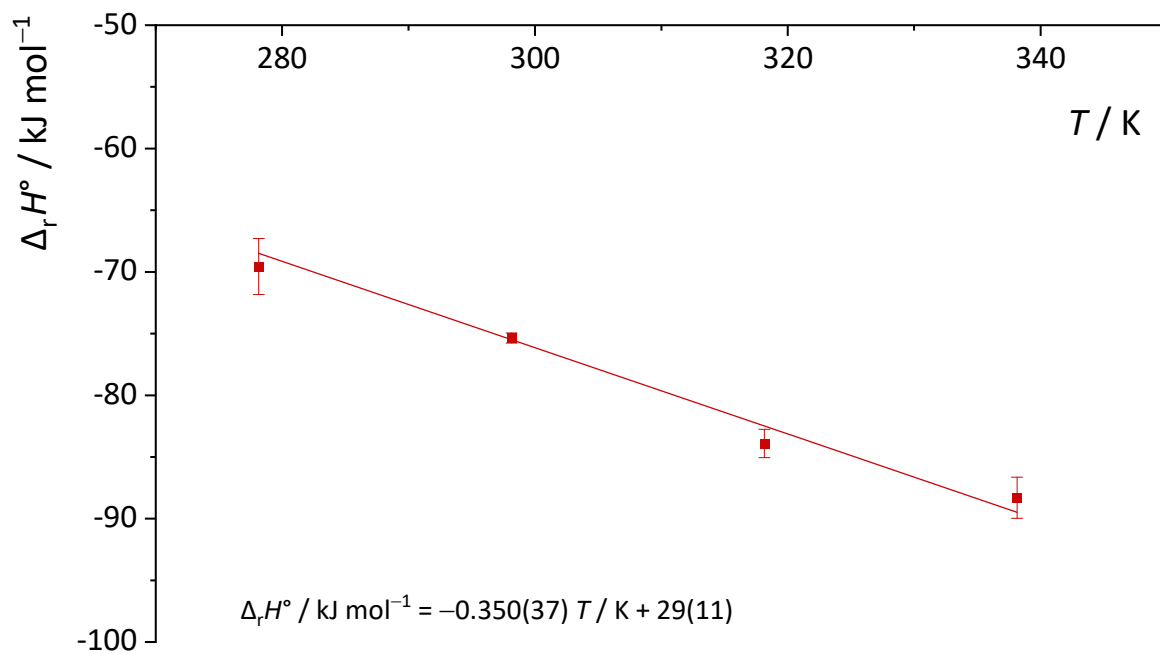

**Figure S50.** The temperature dependence of standard reaction enthalpy for complexation of **4-DAOH** with **CB[7]** in  $\text{H}_2\text{O}$ .



4,9-DA(OH)<sub>2</sub> with CB[7] in H<sub>2</sub>O

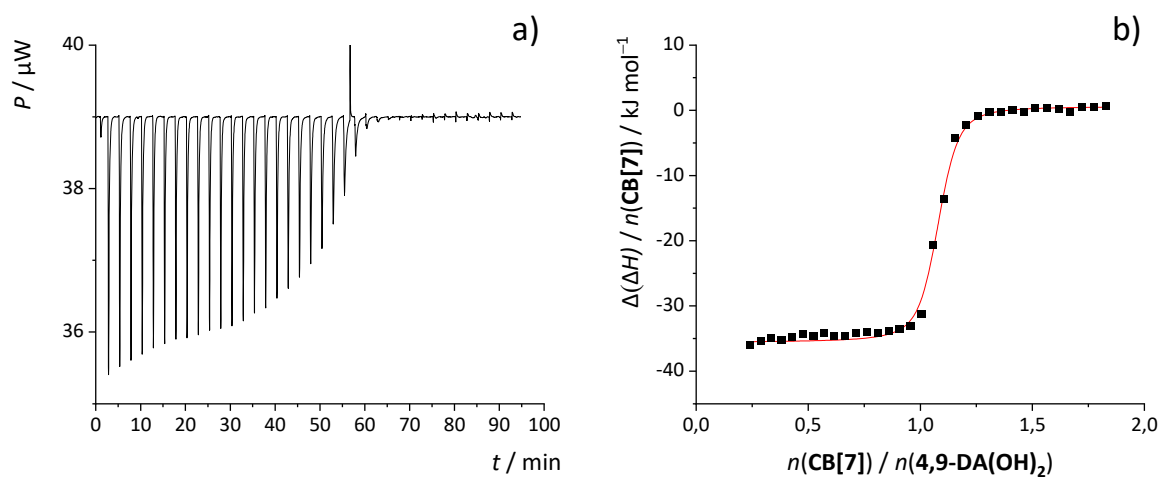

**Figure S51.** Microcalorimetric titration of 4,9-DA(OH)<sub>2</sub> ( $c_0 = 1 \cdot 10^{-4} \text{ mol dm}^{-3}$ ,  $V_0 = 0.205 \text{ mL}$ ) with CB[7] ( $c = 1 \cdot 10^{-3} \text{ mol dm}^{-3}$ ) in H<sub>2</sub>O at 278 K. a) Thermogram. b) The dependence of normalized successive enthalpy changes on host to guest molar ratio. ■ experimental; — calculated.

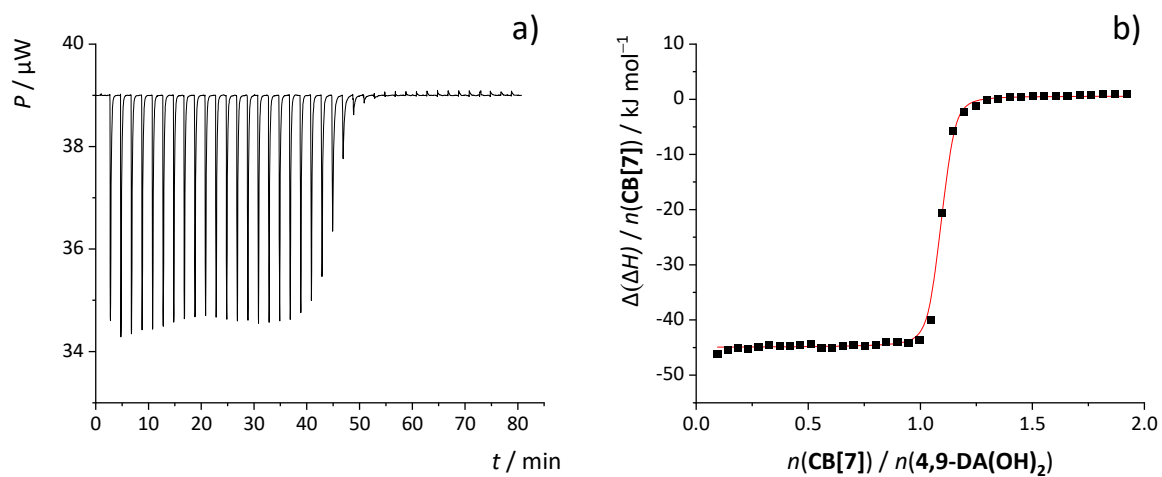

**Figure S52.** Microcalorimetric titration of 4,9-DA(OH)<sub>2</sub> ( $c_0 = 1 \cdot 10^{-4} \text{ mol dm}^{-3}$ ,  $V_0 = 0.205 \text{ mL}$ ) with CB[7] ( $c = 1 \cdot 10^{-3} \text{ mol dm}^{-3}$ ) in H<sub>2</sub>O at 298 K. a) Thermogram. b) The dependence of normalized successive enthalpy changes on host to guest molar ratio. ■ experimental; — calculated.

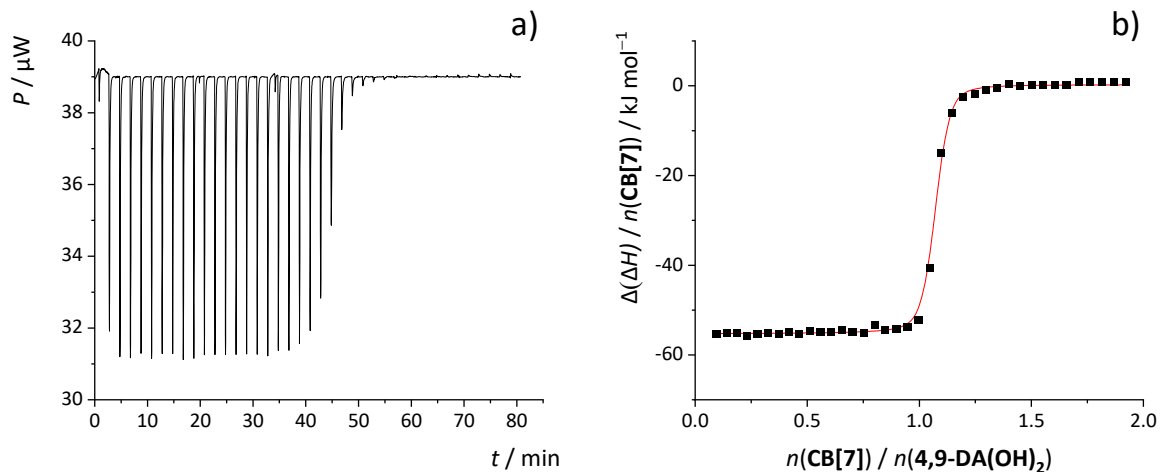

**Figure S53.** Microcalorimetric titration of **4,9-DA(OH)<sub>2</sub>** ( $c_0 = 1 \cdot 10^{-4} \text{ mol dm}^{-3}$ ,  $V_0 = 0.205 \text{ mL}$ ) with **CB[7]** ( $c = 1 \cdot 10^{-3} \text{ mol dm}^{-3}$ ) in  $\text{H}_2\text{O}$  at 318 K. a) Thermogram. b) The dependence of normalized successive enthalpy changes on host to guest molar ratio. ■ experimental; — calculated.

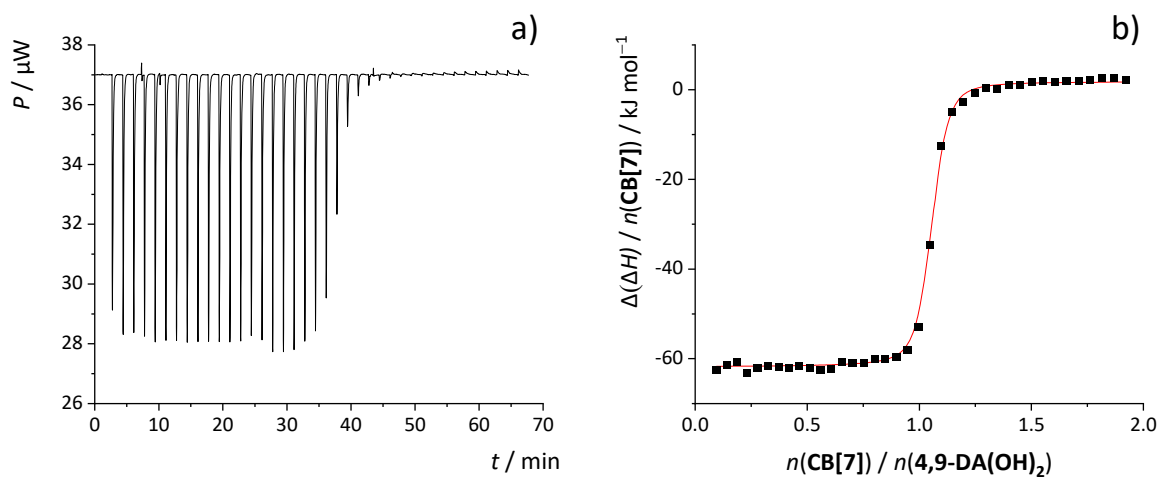

**Figure S54.** Microcalorimetric titration of **4,9-DA(OH)<sub>2</sub>** ( $c_0 = 1 \cdot 10^{-4} \text{ mol dm}^{-3}$ ,  $V_0 = 0.205 \text{ mL}$ ) with **CB[7]** ( $c = 1 \cdot 10^{-3} \text{ mol dm}^{-3}$ ) in  $\text{H}_2\text{O}$  at 338 K. a) Thermogram. b) The dependence of normalized successive enthalpy changes on host to guest molar ratio. ■ experimental; — calculated.

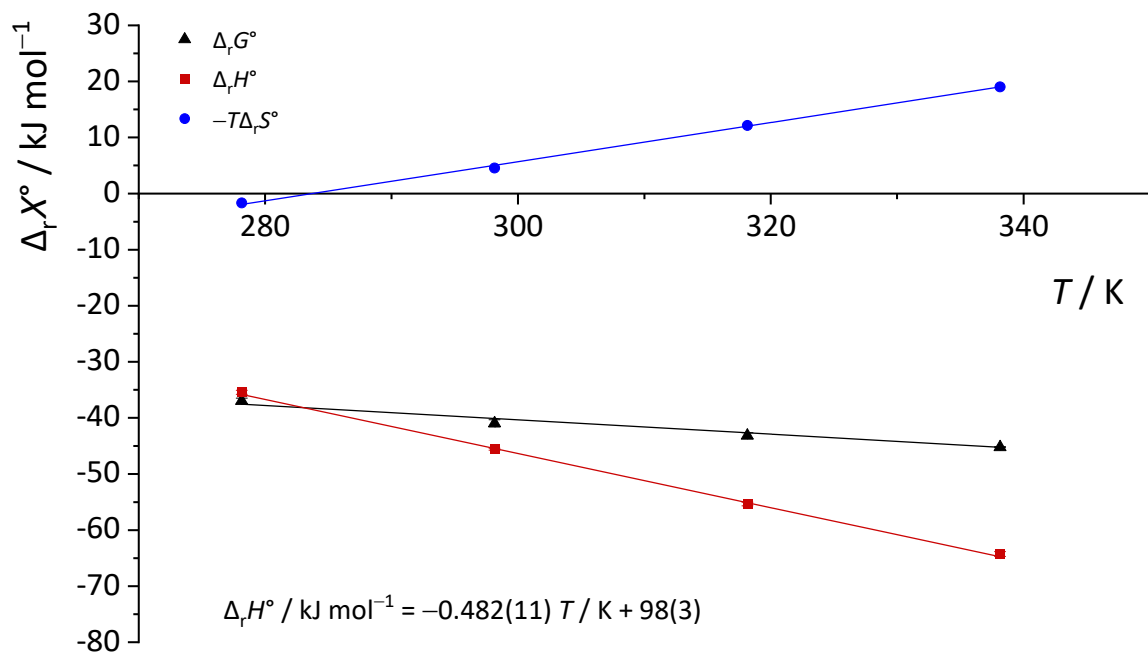

Figure S55. The temperature dependence of standard complexation parameters of 4,9-DA(OH)<sub>2</sub> with CB[7] in H<sub>2</sub>O.

**Table S3.** Thermodynamic parameters for complexation of **1-AdOH** and diamantane alcohols with **CB[7]** in H<sub>2</sub>O.<sup>[a]</sup>

| GUEST · CB[7]                 | T / K | log K                        | $\Delta_r G^\circ / \text{kJ mol}^{-1}$ | $\Delta_r H^\circ / \text{kJ mol}^{-1}$ | $-T\Delta_r S^\circ / \text{kJ mol}^{-1}$ | $\Delta_r C_p^\circ / \text{J K}^{-1} \text{mol}^{-1}$ |
|-------------------------------|-------|------------------------------|-----------------------------------------|-----------------------------------------|-------------------------------------------|--------------------------------------------------------|
| <b>1-AdOH</b>                 | 278   |                              |                                         | -65.4(4)                                |                                           | -482(11)                                               |
|                               | 298   | 10.4 <sup>[b]</sup>          | -59.4 <sup>[b]</sup>                    | -76.70(1)<br>-79.5 <sup>[b]</sup>       | 20.1 <sup>[b]</sup>                       |                                                        |
|                               | 318   |                              |                                         | -83.0(4)                                |                                           |                                                        |
|                               | 338   |                              |                                         | -90.1(4)                                |                                           |                                                        |
| <b>1-DAOH</b>                 | 278   | 6.39(7)                      | -34.0(4)                                | -51.7(2)                                | 17.6(3)                                   | -361(43)                                               |
|                               | 298   | 6.35(6)                      | -36.2(3)                                | -58.5(8)                                | 22.2(8)                                   |                                                        |
|                               | 318   | 5.85(1)                      | -35.62(5)                               | -67.9(8)                                | 32.3(8)                                   |                                                        |
|                               | 338   | 5.46(1)                      | -35.36(8)                               | -68(2)                                  | 33(2)                                     |                                                        |
| <b>4-DAOH</b>                 | 278   |                              |                                         | -70(2)                                  |                                           | -350(37)                                               |
|                               | 298   | 6.8 <sup>[b]</sup>           | -40.2 <sup>[b]</sup>                    | -75.4(4)<br>-50.2 <sup>[b]</sup>        | 11.7 <sup>[b]</sup>                       |                                                        |
|                               | 318   |                              |                                         | -84(1)                                  |                                           |                                                        |
|                               | 338   |                              |                                         | -88(2)                                  |                                           |                                                        |
| <b>4,9-DA(OH)<sub>2</sub></b> | 278   | 6.9(1)                       | -37.0(5)                                | -35.4(4)                                | -1.7(9)                                   | -482(11)                                               |
|                               | 298   | 7.2(1)<br>7.1 <sup>[b]</sup> | -41.0(6)<br>-40.2 <sup>[b]</sup>        | -45.6(1)<br>-52.7 <sup>[b]</sup>        | 4.5(8)<br>12.6 <sup>[b]</sup>             |                                                        |
|                               | 318   | 7.09(9)                      | -43.2(5)                                | -55.4(3)                                | 12.2(6)                                   |                                                        |
|                               | 338   | 6.99(2)                      | -45.2(1)                                | -64.0(5)                                | 19.0(5)                                   |                                                        |

[a] Uncertainties of the last digit(s) are given in parentheses as standard errors of the mean ( $N = 3-5$ ), or standard deviations obtained by weighted linear regression analysis (for  $\Delta_r C_p^\circ$  values); [b] Reference: L. M. Grimm, S. Spicher, B. Tkachenko, P. R. Schreiner, S. Grimme, F. Biedermann, *Chem. Eur. J.*, 2022, **28**, e202200529.

Even though larger thermal noise was in some cases associated with experiments carried out at 278 and 338 K, or that complexation enthalpy was occasionally close to zero, the obtained linear  $\Delta_r H^\circ(T)$  dependencies and the standard errors of the mean obtained by repetitive titration experiments indicate the reliability of determined thermodynamic complexation parameters.

### 1-AdOH with CB[8] in H<sub>2</sub>O

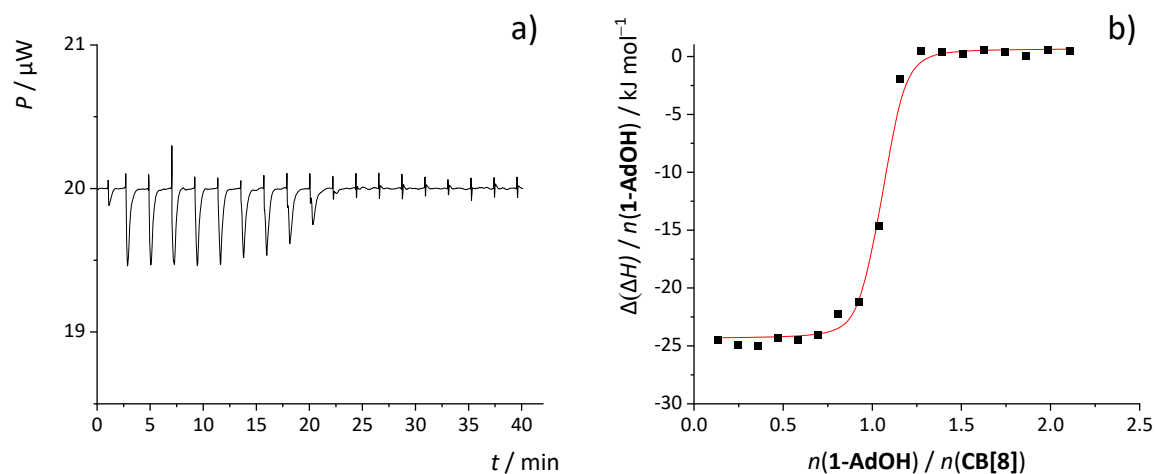

**Figure S56.** Microcalorimetric titration of **CB[8]** ( $c_0 = 2 \cdot 10^{-5} \text{ mol dm}^{-3}$ ,  $V_0 = 0.205 \text{ mL}$ ) with **1-AdOH** ( $c = 4 \cdot 10^{-4} \text{ mol dm}^{-3}$ ) in H<sub>2</sub>O at 278 K. a) Thermogram. b) The dependence of normalized successive enthalpy changes on guest to host molar ratio. ■ experimental; — calculated.

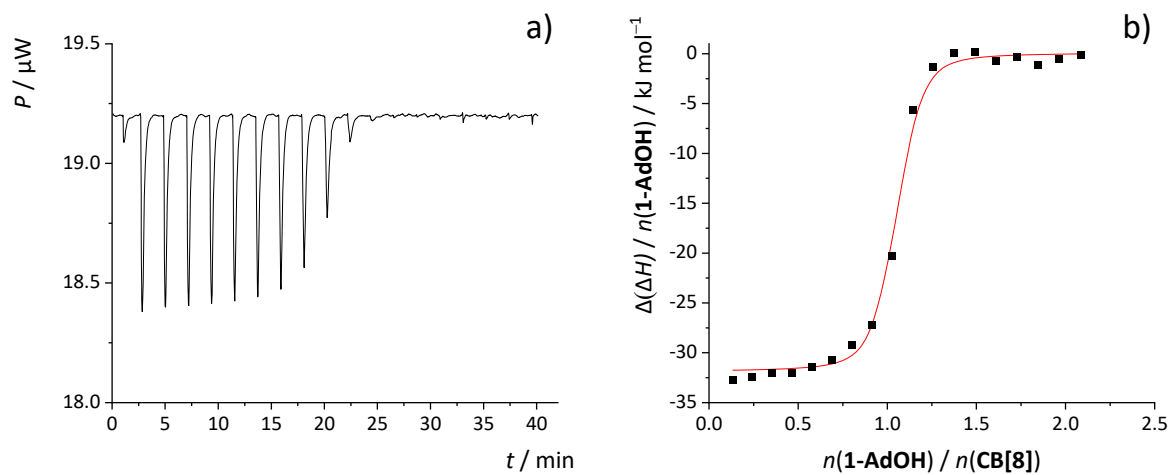

**Figure S57.** Microcalorimetric titration of **CB[8]** ( $c_0 = 2 \cdot 10^{-5} \text{ mol dm}^{-3}$ ,  $V_0 = 0.205 \text{ mL}$ ) with **1-AdOH** ( $c = 4 \cdot 10^{-4} \text{ mol dm}^{-3}$ ) in H<sub>2</sub>O at 298 K. a) Thermogram. b) The dependence of normalized successive enthalpy changes on guest to host molar ratio. ■ experimental; — calculated.

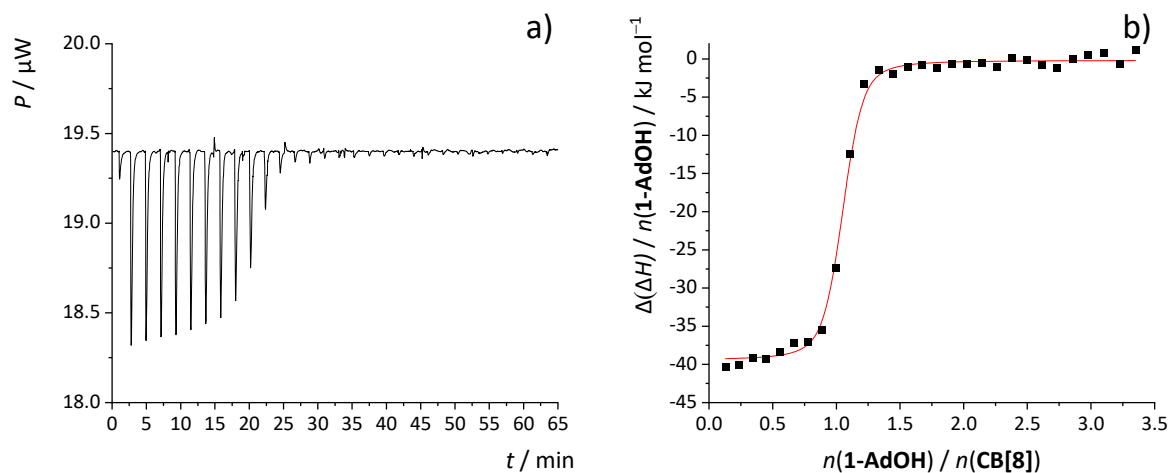

**Figure S58.** Microcalorimetric titration of **CB[8]** ( $c_0 = 2 \cdot 10^{-5} \text{ mol dm}^{-3}$ ,  $V_0 = 0.205 \text{ mL}$ ) with **1-AdOH** ( $c = 4 \cdot 10^{-4} \text{ mol dm}^{-3}$ ) in  $\text{H}_2\text{O}$  at 318 K. a) Thermogram. b) The dependence of normalized successive enthalpy changes on guest to host molar ratio. ■ experimental; — calculated.

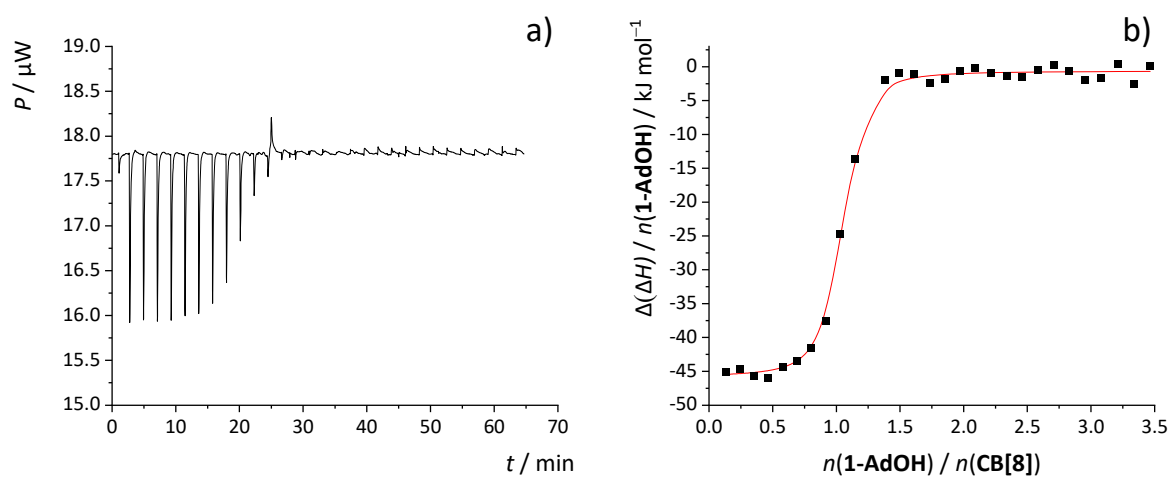

**Figure S59.** Microcalorimetric titration of **CB[8]** ( $c_0 = 2 \cdot 10^{-5} \text{ mol dm}^{-3}$ ,  $V_0 = 0.205 \text{ mL}$ ) with **1-AdOH** ( $c = 4 \cdot 10^{-4} \text{ mol dm}^{-3}$ ) in  $\text{H}_2\text{O}$  at 338 K. a) Thermogram. b) The dependence of normalized successive enthalpy changes on guest to host molar ratio. ■ experimental; — calculated.

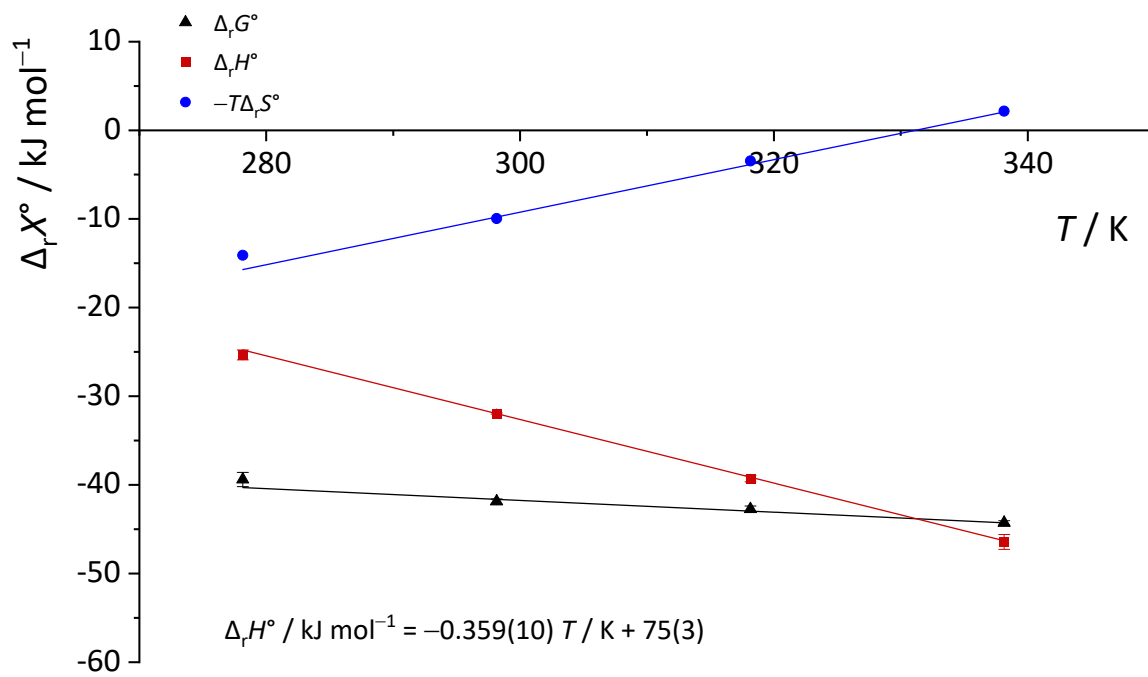

Figure S60. The temperature dependence of standard complexation parameters of 1-AdOH with CB[8] in H<sub>2</sub>O.

4,9-DA(OH)<sub>2</sub> with CB[8] in H<sub>2</sub>O

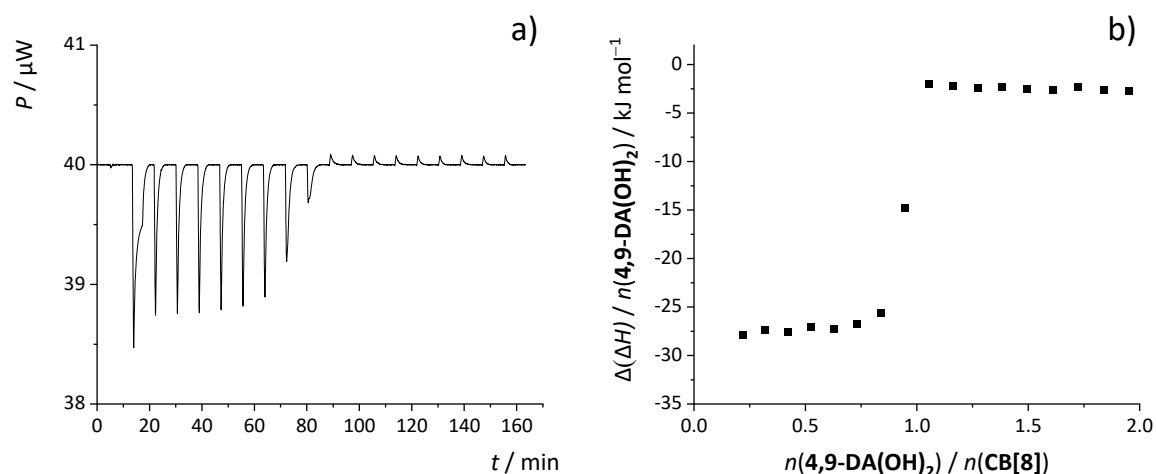

**Figure S61.** Microcalorimetric titration of **CB[8]** ( $c_0 = 2 \cdot 10^{-5} \text{ mol dm}^{-3}$ ,  $V_0 = 1.45 \text{ mL}$ ) with **4,9-DA(OH)<sub>2</sub>** ( $c = 2 \cdot 10^{-4} \text{ mol dm}^{-3}$ ) in H<sub>2</sub>O at 278 K. a) Thermogram. b) The dependence of normalized successive enthalpy changes on guest to host molar ratio.

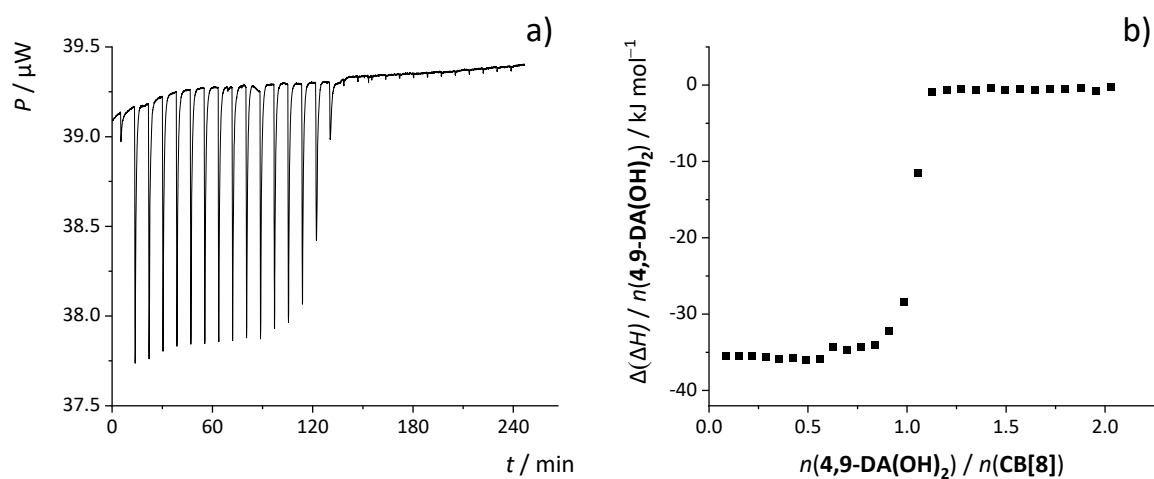

**Figure S62.** Microcalorimetric titration of **CB[8]** ( $c_0 = 2 \cdot 10^{-5} \text{ mol dm}^{-3}$ ,  $V_0 = 1.45 \text{ mL}$ ) with **4,9-DA(OH)<sub>2</sub>** ( $c = 2 \cdot 10^{-4} \text{ mol dm}^{-3}$ ) in H<sub>2</sub>O at 298 K. a) Thermogram. b) The dependence of normalized successive enthalpy changes on guest to host molar ratio.

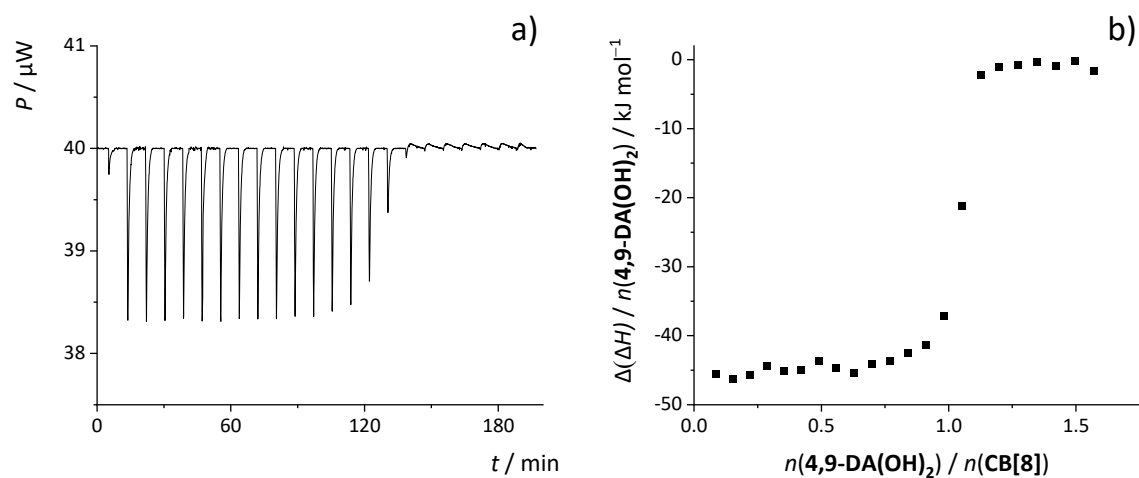

**Figure S63.** Microcalorimetric titration of **CB[8]** ( $c_0 = 2 \cdot 10^{-5} \text{ mol dm}^{-3}$ ,  $V_0 = 1.45 \text{ mL}$ ) with **4,9-DA(OH)<sub>2</sub>** ( $c = 2 \cdot 10^{-4} \text{ mol dm}^{-3}$ ) in H<sub>2</sub>O at 318 K. a) Thermogram. b) The dependence of normalized successive enthalpy changes on guest to host molar ratio.



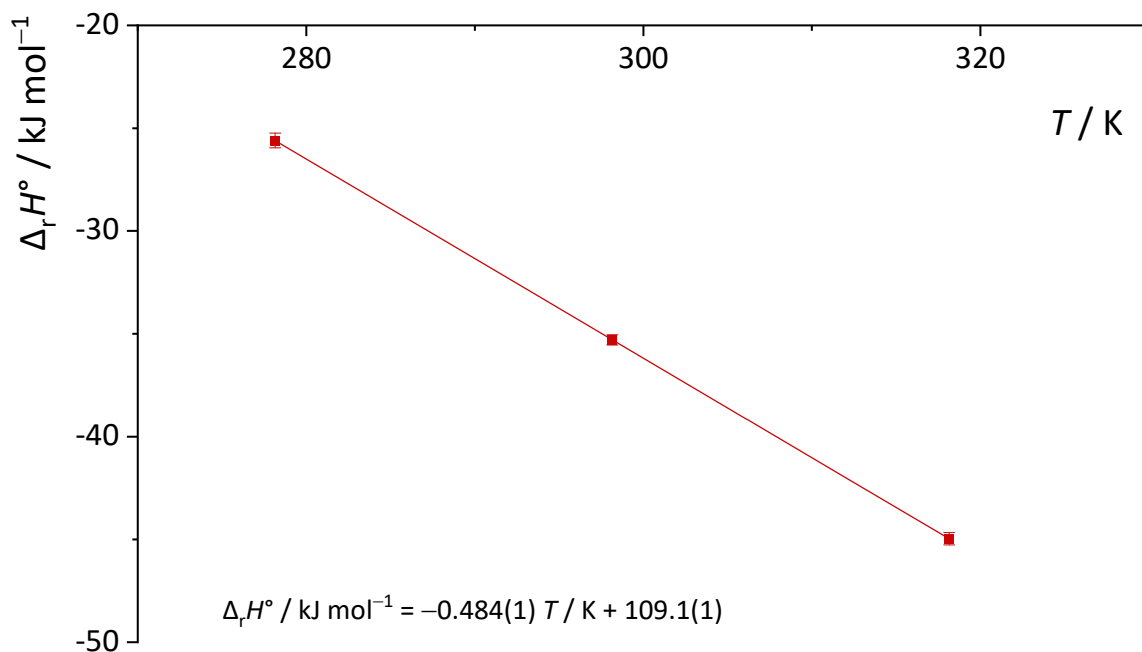

Figure S64. The temperature dependence of standard complexation parameters of **4,9-DA(OH)<sub>2</sub>** with **CB[8]** in H<sub>2</sub>O.

Table S4. Thermodynamic parameters for complexation of **1-AdOH** and diamantane alcohols with **CB[8]** in H<sub>2</sub>O.<sup>[a]</sup>

| GUEST · <b>CB[8]</b>          | <i>T</i> / K | log <i>K</i> <sup>o</sup>     | Δ <sub>r</sub> <i>G</i> <sup>o</sup> / kJ mol <sup>-1</sup> | Δ <sub>r</sub> <i>H</i> <sup>o</sup> / kJ mol <sup>-1</sup> | - <i>T</i> Δ <sub>r</sub> <i>S</i> <sup>o</sup> / kJ mol <sup>-1</sup> | Δ <sub>r</sub> <i>C<sub>p</sub></i> <sup>o</sup> / J K <sup>-1</sup> mol <sup>-1</sup> |
|-------------------------------|--------------|-------------------------------|-------------------------------------------------------------|-------------------------------------------------------------|------------------------------------------------------------------------|----------------------------------------------------------------------------------------|
| <b>1-AdOH</b>                 | 278          | 7.4(1)                        | -39.4(8)                                                    | -25.3(6)                                                    | -14(1)                                                                 | -359(10)                                                                               |
|                               | 298          | 7.34(5)<br>6.8 <sup>[b]</sup> | -41.9(3)<br>-38.9 <sup>[b]</sup>                            | -31.93(3)<br>-33.9 <sup>[b]</sup>                           | -10.0(3)<br>-5.0 <sup>[b]</sup>                                        |                                                                                        |
|                               | 318          | 7.02(6)                       | -42.7(4)                                                    | -39.3(4)                                                    | -3.5(7)                                                                |                                                                                        |
|                               | 338          | 6.84(4)                       | -44.3(2)                                                    | -46.4(8)                                                    | 2(1)                                                                   |                                                                                        |
| <b>4-DAOH</b>                 | 298          | 6.6 <sup>[b]</sup>            | -38.1 <sup>[b]</sup>                                        | -32.6 <sup>[b]</sup>                                        | -5.0 <sup>[b]</sup>                                                    |                                                                                        |
| <b>4,9-DA(OH)<sub>2</sub></b> | 278          | 7.9(1)                        | -42(1)                                                      | -25.6(4)                                                    | -17(1)                                                                 | -484(1)                                                                                |
|                               | 298          | 7.78(4)<br>7.2 <sup>[b]</sup> | -44.4(2)<br>-41.4 <sup>[b]</sup>                            | -35.3(2)<br>-32.2 <sup>[b]</sup>                            | -9.1(2)<br>-9.6 <sup>[b]</sup>                                         |                                                                                        |
|                               | 318          | 7.6(1)                        | -46.2(6)                                                    | -45.0(3)                                                    | -1.2(6)                                                                |                                                                                        |

[a] Uncertainties of the last digit(s) are given in parentheses as standard errors of the mean ( $N = 3-5$ ), or standard deviations obtained by weighted linear regression analysis (for  $\Delta_r C_p^\circ$  values); [b] Reference: L. M. Grimm, S. Spicher, B. Tkachenko, P. R. Schreiner, S. Grimme, F. Biedermann, *Chem. Eur. J.*, 2022, **28**, e202200529.

Even though larger thermal noise was in some cases associated with experiments carried out at 278 and 338 K, or that complexation enthalpy was occasionally close to zero, the obtained linear  $\Delta_r H^\circ(T)$  dependencies and the standard errors of the mean obtained by repetitive titration experiments indicate the reliability of determined thermodynamic complexation parameters

## Packing coefficients

**Table S5.** Guest volumes and packing coefficients (PCs) of the studied CD complexes with diamondoid alcohols. Guest atoms/groups not located in the inner CD cavity and therefore not included in PC calculations are marked with black dots.<sup>a,b</sup>

| Guest                                                                                                                                                      | $\beta$ -CD•guest                                                                                                                                                                                                                                     | $\gamma$ -CD•guest                                                                                                                                                                                                      |
|------------------------------------------------------------------------------------------------------------------------------------------------------------|-------------------------------------------------------------------------------------------------------------------------------------------------------------------------------------------------------------------------------------------------------|-------------------------------------------------------------------------------------------------------------------------------------------------------------------------------------------------------------------------|
| <p><b>1-AdOH</b></p> 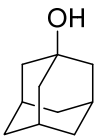 <p>volume = 153 Å<sup>3</sup></p>                   |  <p>C<sub>10</sub>H<sub>16</sub>O</p> <p>volume buried in cavity = 153 Å<sup>3</sup><br/>packing coefficient = 58%</p>                                               |  <p>C<sub>10</sub>H<sub>16</sub>O</p> <p>volume buried in cavity = 153 Å<sup>3</sup><br/>packing coefficient = 36%</p>               |
| <p><b>1-DAOH</b></p>  <p>volume = 198 Å<sup>3</sup></p>                   |  <p>C<sub>14</sub>H<sub>20</sub>O - [C<sub>5</sub>H<sub>8</sub>]</p> <p>volume buried in cavity = 153 Å<sup>3</sup><br/>packing coefficient = 58%</p>                |  <p>C<sub>14</sub>H<sub>20</sub>O</p> <p>volume buried in cavity = 198 Å<sup>3</sup><br/>packing coefficient = 46%</p>               |
| <p><b>4-DAOH</b></p>  <p>volume = 198 Å<sup>3</sup></p>                 |  <p>C<sub>14</sub>H<sub>20</sub>O - [C<sub>7</sub>H<sub>10</sub>O]</p> <p>volume buried in cavity = 112 Å<sup>3</sup><br/>packing coefficient = 43%</p>            |  <p>C<sub>14</sub>H<sub>20</sub>O</p> <p>volume buried in cavity = 198 Å<sup>3</sup><br/>packing coefficient = 46%</p>             |
| <p><b>4,9-DA(OH)<sub>2</sub></b></p>  <p>volume = 206 Å<sup>3</sup></p> |  <p>C<sub>14</sub>H<sub>20</sub>O<sub>2</sub> - [C<sub>5</sub>H<sub>8</sub>O]</p> <p>volume buried in cavity = 143 Å<sup>3</sup><br/>packing coefficient = 55%</p> |  <p>C<sub>14</sub>H<sub>20</sub>O<sub>2</sub></p> <p>volume buried in cavity = 206 Å<sup>3</sup><br/>packing coefficient = 48%</p> |

<sup>a</sup> Complex geometries obtained from CREST/GFN2-xTB computations with included ALPB(water) solvation. <sup>b</sup> CD cavity volumes taken as  $V(\beta\text{-CD})=262 \text{ \AA}^3$ ,  $V(\gamma\text{-CD})=427 \text{ \AA}^3$ , according to reference J. Szejtli, *Chem. Rev.* **1998**, *98*, 1743–1753.

## Microcalorimetric titrations in formamide (FMD)

### 1-DAOH with $\beta$ -CD in FMD

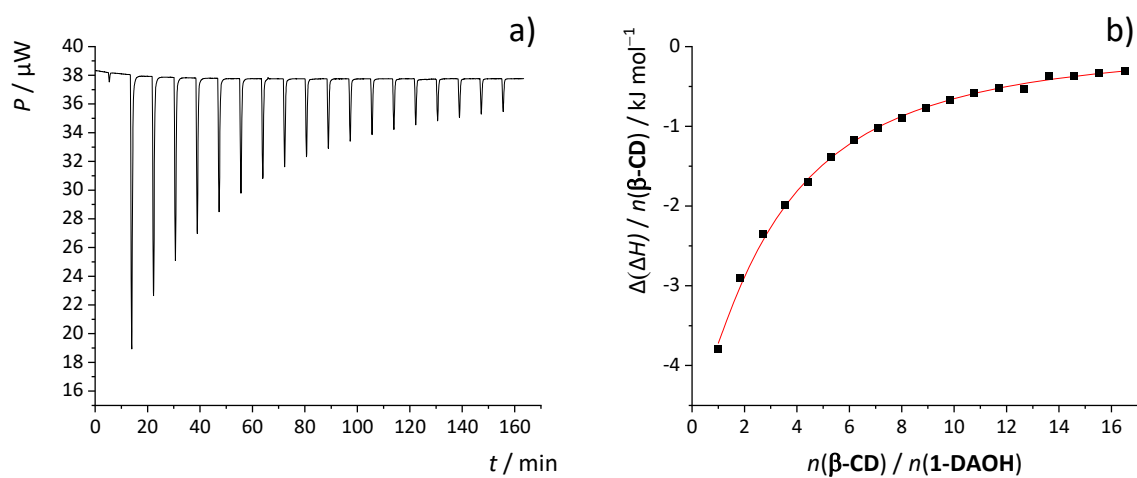

**Figure S65.** Microcalorimetric titration of **1-DAOH** ( $c_0 = 2 \cdot 10^{-5} \text{ mol dm}^{-3}$ ,  $V_0 = 1.45 \text{ mL}$ ) with  **$\beta$ -CD** ( $c = 1 \cdot 10^{-2} \text{ mol dm}^{-3}$ ) in FMD at 298 K. a) Thermogram. b) The dependence of normalized successive enthalpy changes on host to guest molar ratio. ■ experimental; — calculated.

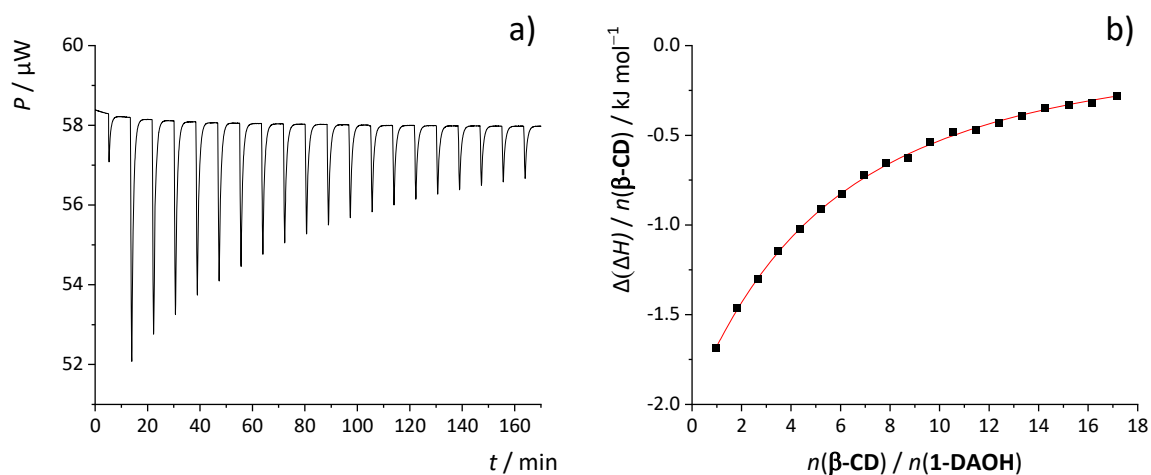

**Figure S66.** Microcalorimetric titration of **1-DAOH** ( $c_0 = 2 \cdot 10^{-5} \text{ mol dm}^{-3}$ ,  $V_0 = 1.45 \text{ mL}$ ) with  **$\beta$ -CD** ( $c = 1 \cdot 10^{-2} \text{ mol dm}^{-3}$ ) in FMD at 318 K. a) Thermogram. b) The dependence of normalized successive enthalpy changes on host to guest molar ratio. ■ experimental; — calculated.

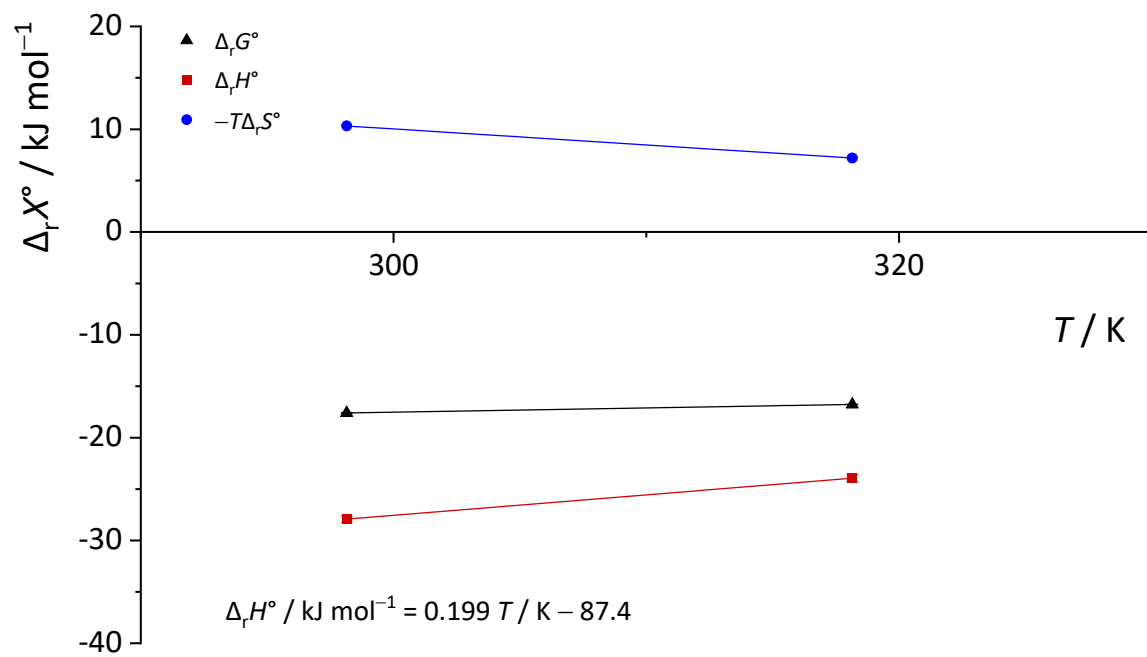

Figure S67. The temperature dependence of standard complexation parameters of **1-DAOH** with  **$\beta$ -CD** in FMD.

### 4-DAOH with $\beta$ -CD in FMD

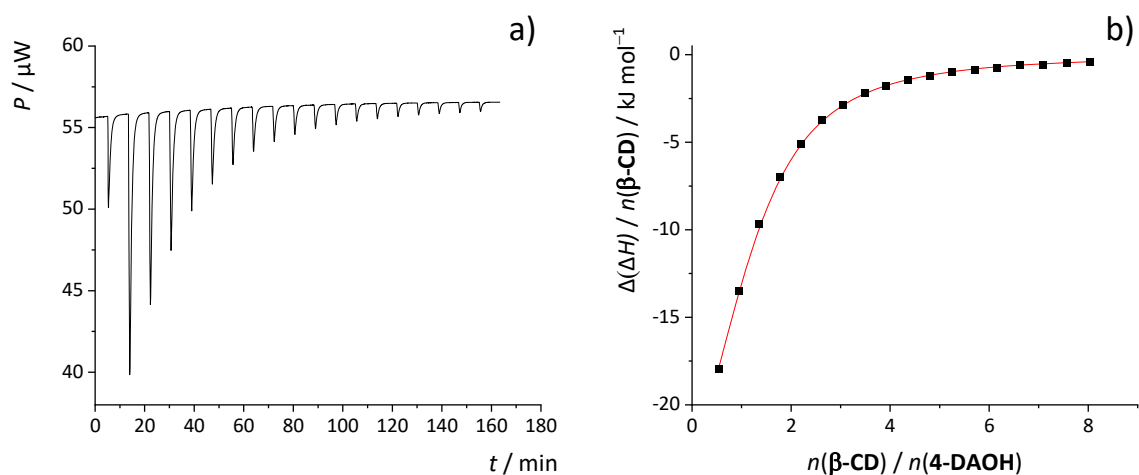

**Figure S68.** Microcalorimetric titration of **4-DAOH** ( $c_0 = 1 \cdot 10^{-4} \text{ mol dm}^{-3}$ ,  $V_0 = 1.45 \text{ mL}$ ) with  **$\beta$ -CD** ( $c = 6 \cdot 10^{-3} \text{ mol dm}^{-3}$ ) in FMD at 278 K. a) Thermogram. b) The dependence of normalized successive enthalpy changes on host to guest molar ratio. ■ experimental; — calculated.

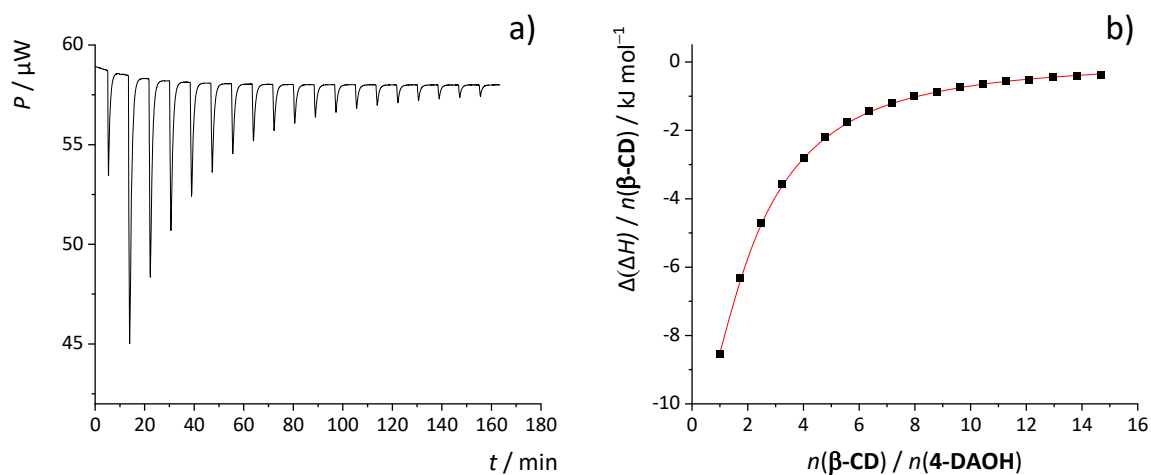

**Figure S69.** Microcalorimetric titration of **4-DAOH** ( $c_0 = 1 \cdot 10^{-4} \text{ mol dm}^{-3}$ ,  $V_0 = 1.45 \text{ mL}$ ) with  **$\beta$ -CD** ( $c = 6 \cdot 10^{-3} \text{ mol dm}^{-3}$ ) in FMD at 298 K. a) Thermogram. b) The dependence of normalized successive enthalpy changes on host to guest molar ratio. ■ experimental; — calculated.

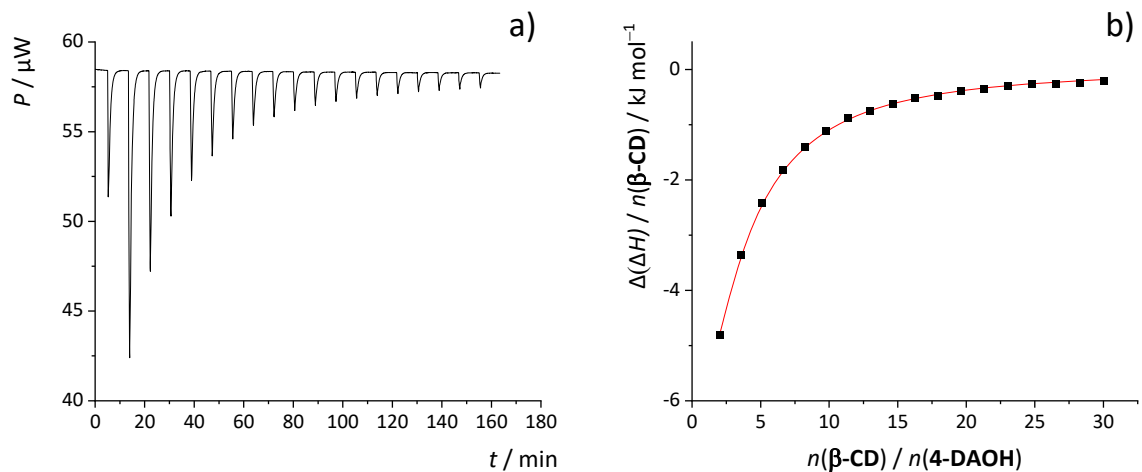

**Figure S70.** Microcalorimetric titration of **4-DAOH** ( $c_0 = 1 \cdot 10^{-4} \text{ mol dm}^{-3}$ ,  $V_0 = 1.45 \text{ mL}$ ) with  **$\beta$ -CD** ( $c = 2 \cdot 10^{-2} \text{ mol dm}^{-3}$ ) in FMD at 318 K. a) Thermogram. b) The dependence of normalized successive enthalpy changes on host to guest molar ratio. ■ experimental; — calculated.

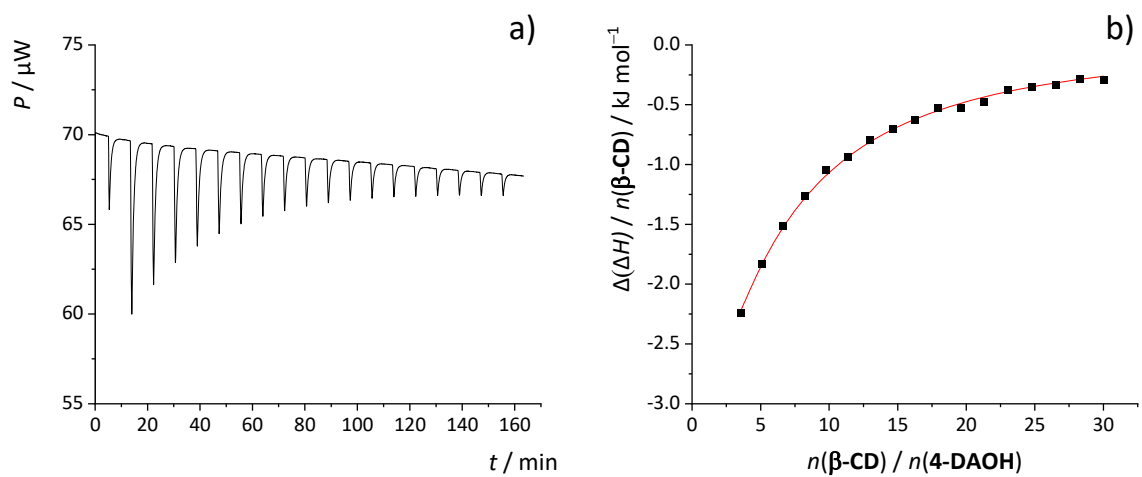

**Figure S71.** Microcalorimetric titration of **4-DAOH** ( $c_0 = 1 \cdot 10^{-4} \text{ mol dm}^{-3}$ ,  $V_0 = 1.45 \text{ mL}$ ) with  **$\beta$ -CD** ( $c = 2 \cdot 10^{-2} \text{ mol dm}^{-3}$ ) in FMD at 338 K. a) Thermogram. b) The dependence of normalized successive enthalpy changes on host to guest molar ratio. ■ experimental; — calculated.

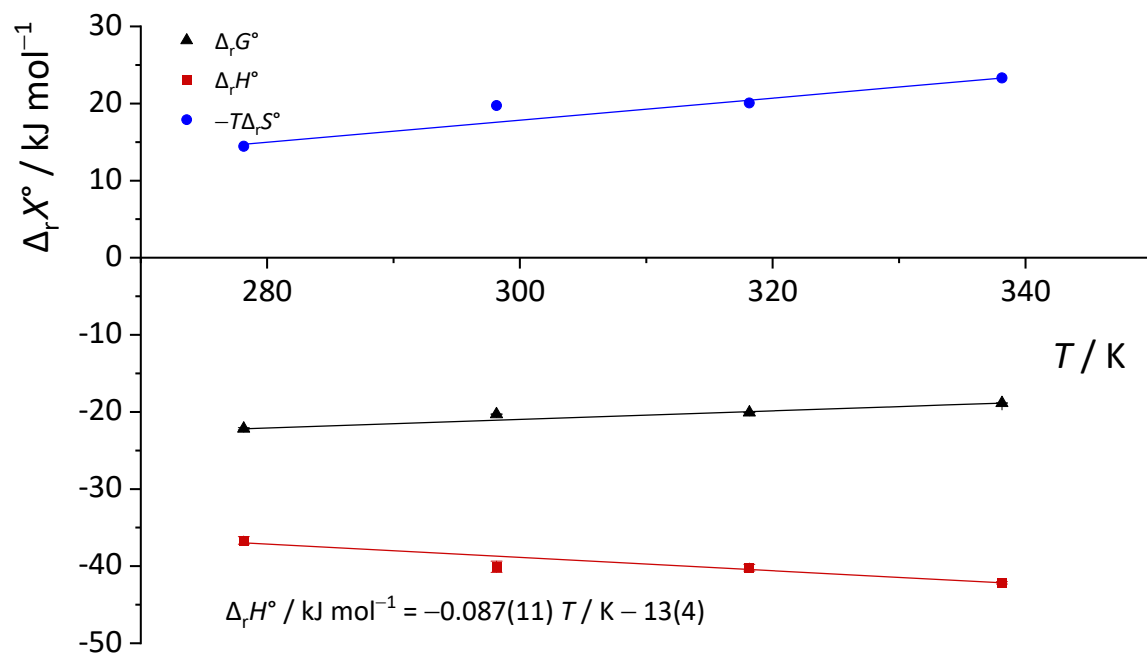

Figure S72. The temperature dependence of standard complexation parameters of 4-DAOH with  $\beta$ -CD in FMD.

**4,9-DA(OH)<sub>2</sub> with β-CD in FMD**

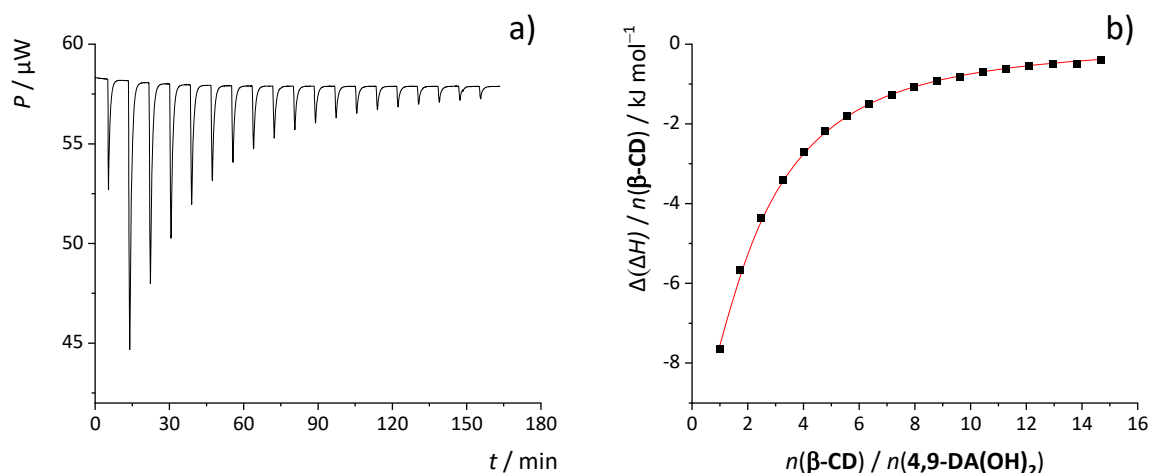

**Figure S73.** Microcalorimetric titration of **4,9-DA(OH)<sub>2</sub>** ( $c_0 = 1 \cdot 10^{-4} \text{ mol dm}^{-3}$ ,  $V_0 = 1.45 \text{ mL}$ ) with **β-CD** ( $c = 8 \cdot 10^{-3} \text{ mol dm}^{-3}$ ) in FMD at 298 K. a) Thermogram. b) The dependence of normalized successive enthalpy changes on host to guest molar ratio. ■ experimental; — calculated.

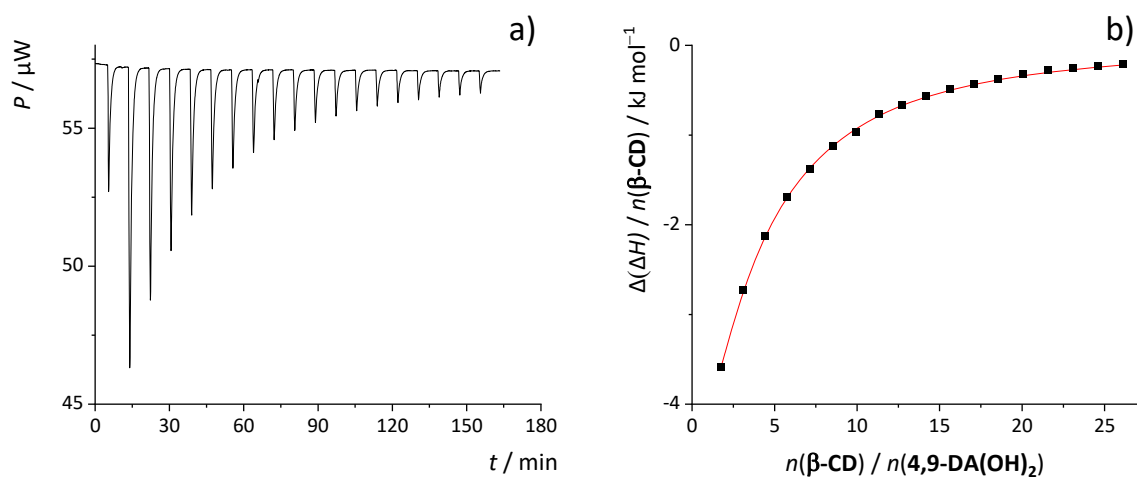

**Figure S74.** Microcalorimetric titration of **4,9-DA(OH)<sub>2</sub>** ( $c_0 = 1 \cdot 10^{-4} \text{ mol dm}^{-3}$ ,  $V_0 = 1.45 \text{ mL}$ ) with **β-CD** ( $c = 1 \cdot 10^{-2} \text{ mol dm}^{-3}$ ) in FMD at 318 K. a) Thermogram. b) The dependence of normalized successive enthalpy changes on host to guest molar ratio. ■ experimental; — calculated.

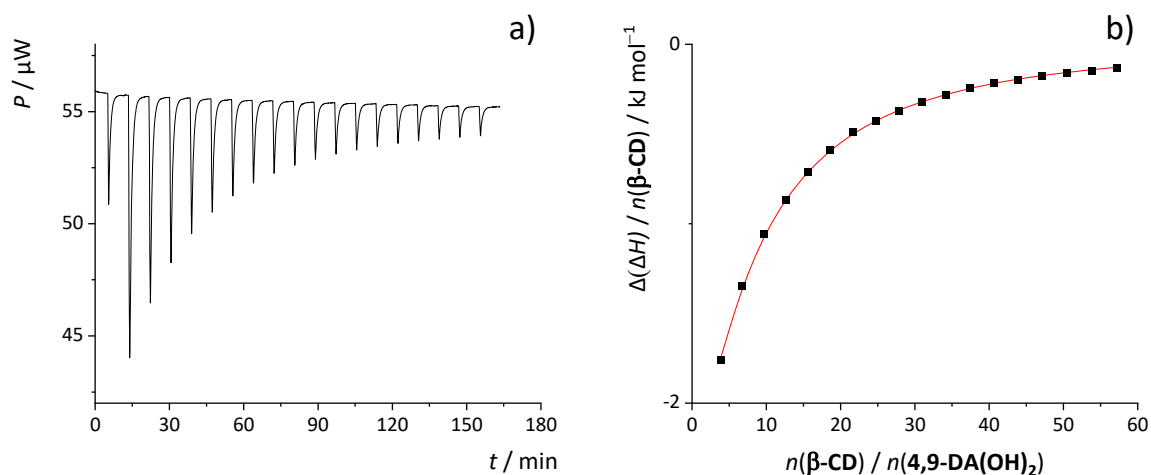

**Figure S75.** Microcalorimetric titration of **4,9-DA(OH)<sub>2</sub>** ( $c_0 = 1 \cdot 10^{-4} \text{ mol dm}^{-3}$ ,  $V_0 = 1.45 \text{ mL}$ ) with **β-CD** ( $c = 3 \cdot 10^{-2} \text{ mol dm}^{-3}$ ) in FMD at 338 K. a) Thermogram. b) The dependence of normalized successive enthalpy changes on host to guest molar ratio. ■ experimental; — calculated.



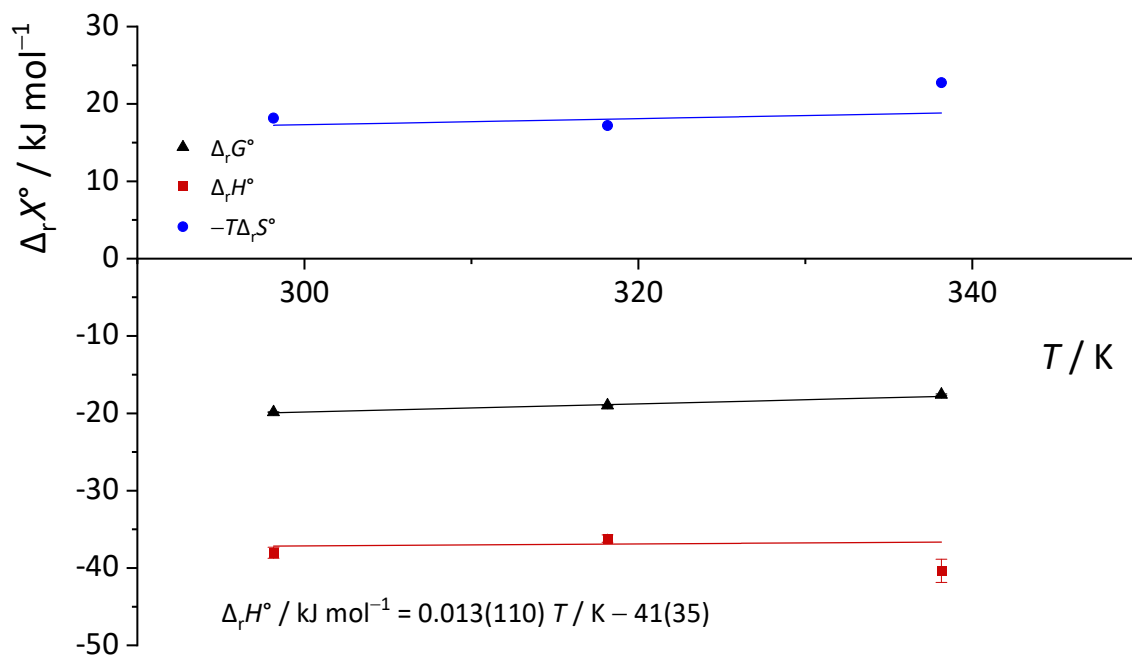

Figure S76. The temperature dependence of standard complexation parameters of 4,9-DA(OH)<sub>2</sub> with β-CD in FMD.

Table S6. Thermodynamic parameters for complexation of AdOH and diamantane alcohols with β-CD in FMD.<sup>[a]</sup>

| GUEST · β-CD            | $T / \text{K}$ | $\log K^\circ$ | $\Delta_r G^\circ / \text{kJ mol}^{-1}$ | $\Delta_r H^\circ / \text{kJ mol}^{-1}$ | $-T\Delta_r S^\circ / \text{kJ mol}^{-1}$ | $\Delta_r C_p^\circ / \text{J K}^{-1} \text{mol}^{-1}$ |
|-------------------------|----------------|----------------|-----------------------------------------|-----------------------------------------|-------------------------------------------|--------------------------------------------------------|
| 1-AdOH                  | 278            | 3.71(1)        | -19.76(4)                               | -33.7(3)                                | 14.0(4)                                   | -173(25)                                               |
|                         | 298            | 3.32(1)        | -18.94(8)                               | -35.6(5)                                | 16.6(6)                                   |                                                        |
|                         | 338            | 2.64(1)        | -17.08(2)                               | -40.5(2)                                | 23.4(2)                                   |                                                        |
| 1-DAOH                  | 298            | 3.08(1)        | -17.60(4)                               | -27.9(3)                                | 10.3(3)                                   | 199                                                    |
|                         | 318            | 2.75(1)        | -16.77(2)                               | -23.9(4)                                | 7.2(4)                                    |                                                        |
| 4-DAOH                  | 278            | 4.17(3)        | -22.2(2)                                | -36.7(5)                                | 14.5(4)                                   | -87(11)                                                |
|                         | 298            | 3.56(1)        | -20.3(1)                                | -40.1(7)                                | 19.7(8)                                   |                                                        |
|                         | 318            | 3.30(1)        | -20.08(2)                               | -40.2(4)                                | 20.1(4)                                   |                                                        |
|                         | 338            | 2.91(1)        | -18.84(1)                               | -42.2(4)                                | 23.3(2)                                   |                                                        |
| 4,9-DA(OH) <sub>2</sub> | 298            | 3.48(1)        | -19.86(6)                               | -38.0(7)                                | 18.2(8)                                   | ≈ 0                                                    |
|                         | 318            | 3.12(1)        | -18.98(1)                               | -36.2(5)                                | 17.20(2)                                  |                                                        |
|                         | 338            | 2.72(2)        | -17.6(1)                                | -40(2)                                  | 23(2)                                     |                                                        |

[a] Uncertainties of the last digit(s) are given in parentheses as standard errors of the mean ( $N = 3-5$ ), or standard deviations obtained by weighted linear regression analysis (for  $\Delta_r C_p^\circ$  values).

Even though larger thermal noise was in some cases associated with experiments carried out at 278 and 338 K, or that complexation enthalpy was occasionally close to zero, the obtained linear  $\Delta_r H^\circ(T)$  dependencies and the standard errors of the mean obtained by repetitive titration experiments indicate the reliability of determined thermodynamic complexation parameters

## Microcalorimetric titrations in ethylene glycol (EG)

1-DAOH with  $\beta$ -CD in EG

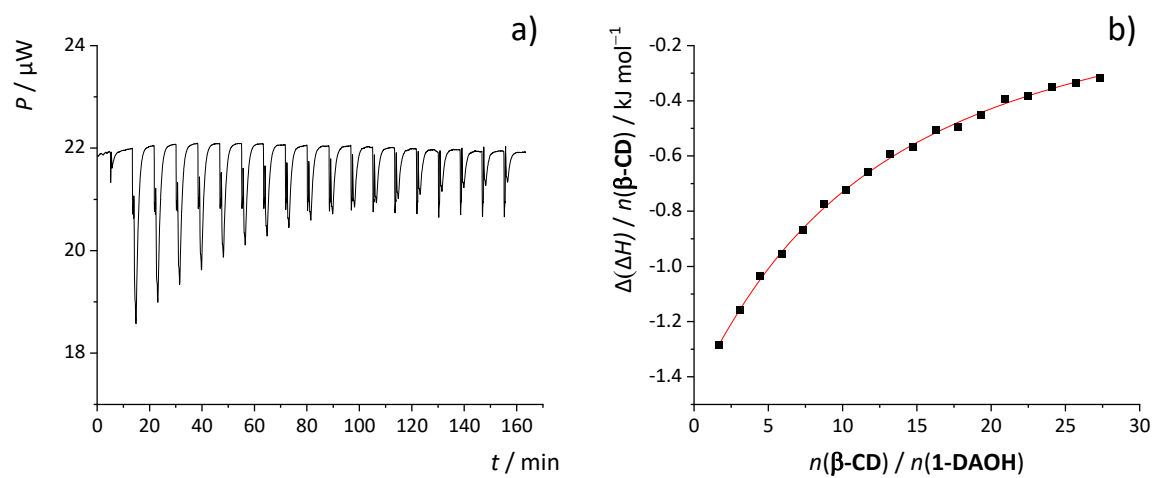

**Figure S77.** Microcalorimetric titration of **1-DAOH** ( $c_0 = 1 \cdot 10^{-4} \text{ mol dm}^{-3}$ ,  $V_0 = 1.45 \text{ mL}$ ) with  **$\beta$ -CD** ( $c = 2 \cdot 10^{-2} \text{ mol dm}^{-3}$ ) in EG at 288 K. a) Thermogram. b) The dependence of normalized successive enthalpy changes on host to guest molar ratio. ■ experimental; — calculated. The peculiar  $P(t)$  dependence is a consequence of slow heat compensation in ethylene glycol.

### 4-DAOH with $\beta$ -CD in EG

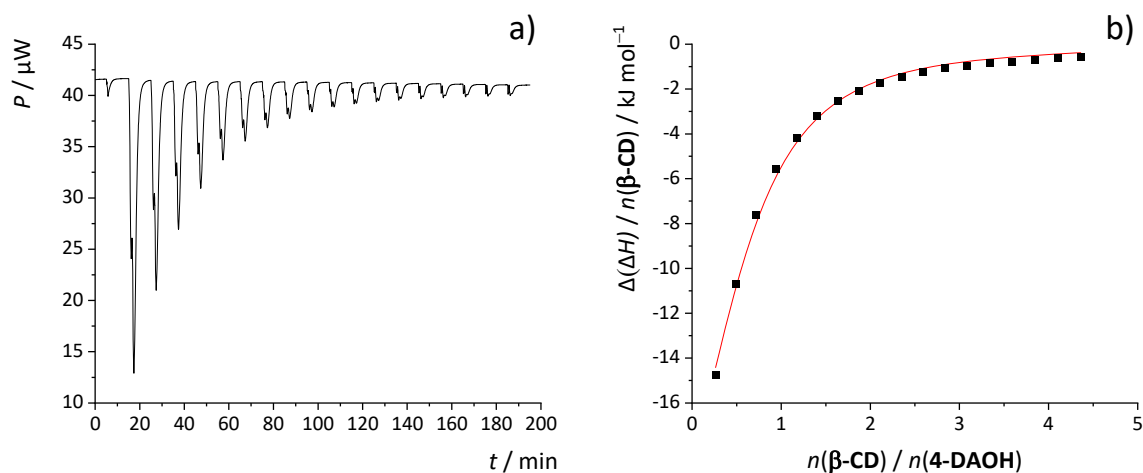

**Figure S78.** Microcalorimetric titration of **4-DAOH** ( $c_0 = 4 \cdot 10^{-4} \text{ mol dm}^{-3}$ ,  $V_0 = 1.45 \text{ mL}$ ) with  $\beta$ -CD ( $c = 2 \cdot 10^{-2} \text{ mol dm}^{-3}$ ) in EG at 278 K. a) Thermogram. b) The dependence of normalized successive enthalpy changes on host to guest molar ratio. ■ experimental; — calculated. The peculiar  $P(t)$  dependence is a consequence of slow heat compensation in ethylene glycol.

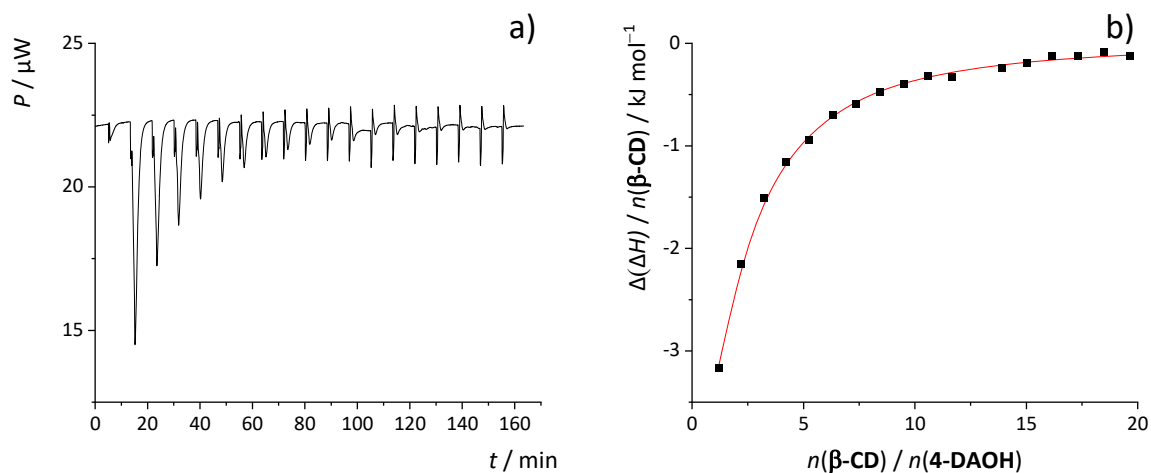

**Figure S79.** Microcalorimetric titration of **4-DAOH** ( $c_0 = 1 \cdot 10^{-4} \text{ mol dm}^{-3}$ ,  $V_0 = 1.45 \text{ mL}$ ) with  $\beta$ -CD ( $c = 2 \cdot 10^{-2} \text{ mol dm}^{-3}$ ) in EG at 288 K. a) Thermogram. b) The dependence of normalized successive enthalpy changes on host to guest molar ratio. ■ experimental; — calculated. The peculiar  $P(t)$  dependence is a consequence of slow heat compensation in ethylene glycol.

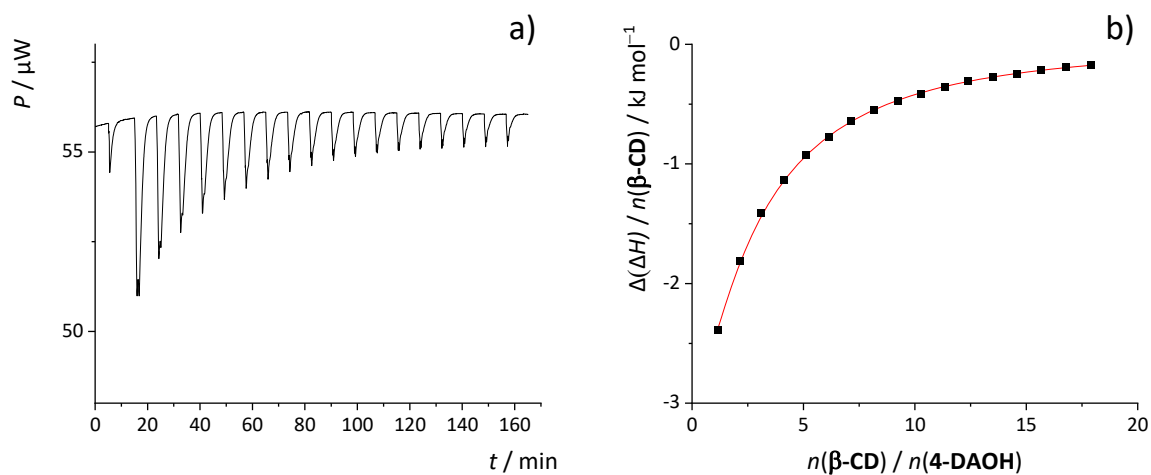

**Figure S80.** Microcalorimetric titration of **4-DAOH** ( $c_0 = 1 \cdot 10^{-4} \text{ mol dm}^{-3}$ ,  $V_0 = 1.45 \text{ mL}$ ) with  $\beta$ -CD ( $c = 2 \cdot 10^{-2} \text{ mol dm}^{-3}$ ) in EG at 298 K. a) Thermogram. b) The dependence of normalized successive enthalpy changes on host to guest molar ratio. ■ experimental; — calculated. The peculiar  $P(t)$  dependence is a consequence of slow heat compensation in ethylene glycol.

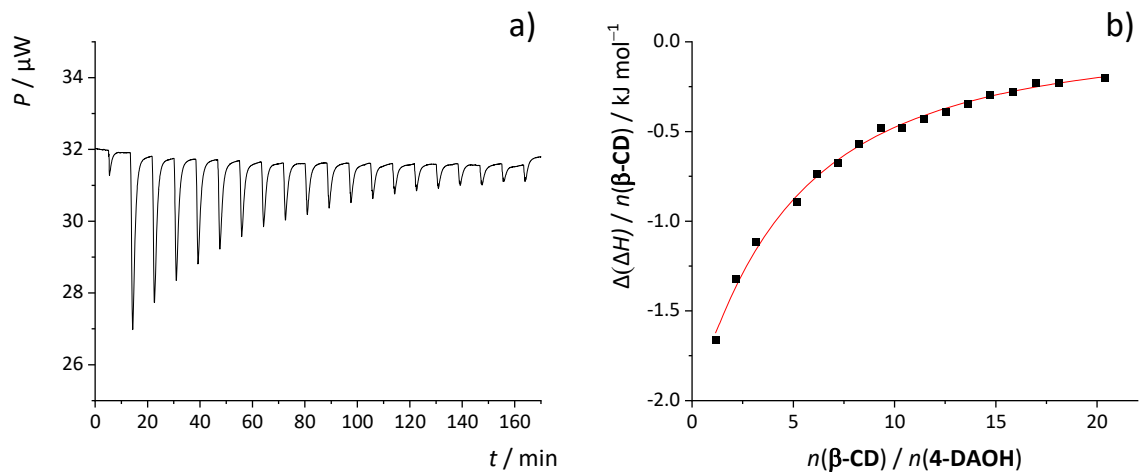

**Figure S81.** Microcalorimetric titration of **4-DAOH** ( $c_0 = 1 \cdot 10^{-4} \text{ mol dm}^{-3}$ ,  $V_0 = 1.45 \text{ mL}$ ) with  **$\beta$ -CD** ( $c = 2 \cdot 10^{-2} \text{ mol dm}^{-3}$ ) in EG at 308 K. a) Thermogram. b) The dependence of normalized successive enthalpy changes on host to guest molar ratio. ■ experimental; - calculated.

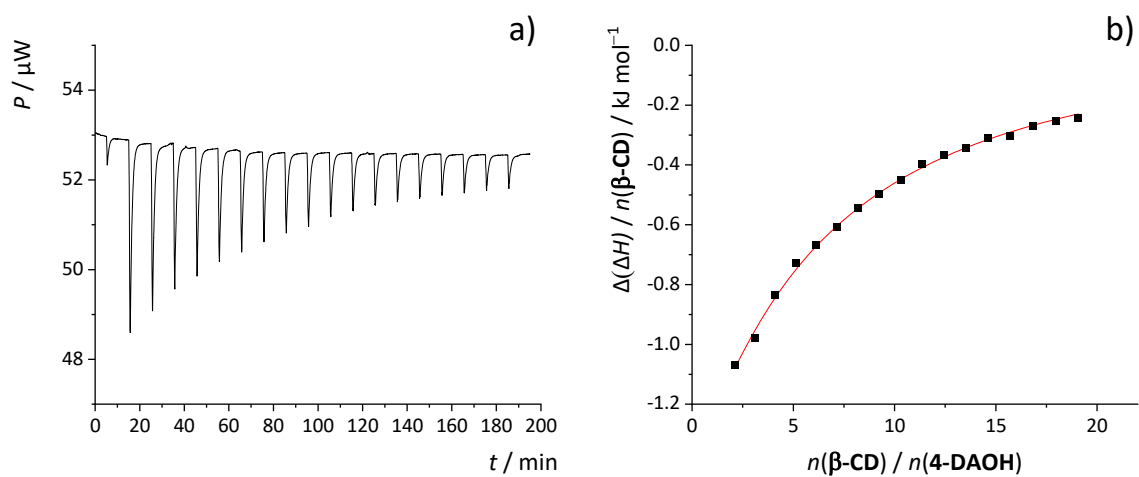

**Figure S82.** Microcalorimetric titration of **4-DAOH** ( $c_0 = 1 \cdot 10^{-4} \text{ mol dm}^{-3}$ ,  $V_0 = 1.45 \text{ mL}$ ) with  **$\beta$ -CD** ( $c = 2 \cdot 10^{-2} \text{ mol dm}^{-3}$ ) in EG at 318 K. a) Thermogram. b) The dependence of normalized successive enthalpy changes on host to guest molar ratio. ■ experimental; - calculated.

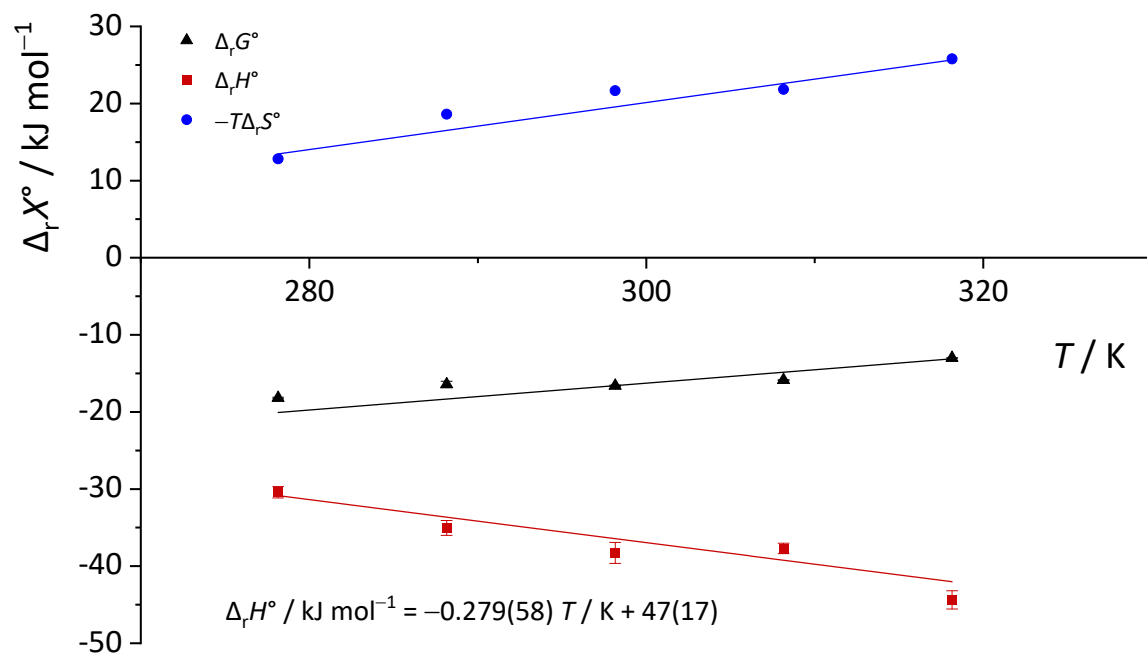

Figure S83. The temperature dependence of standard complexation parameters of 4-DAOH with  $\beta$ -CD in EG.

4,9-DA(OH)<sub>2</sub> with β-CD in EG

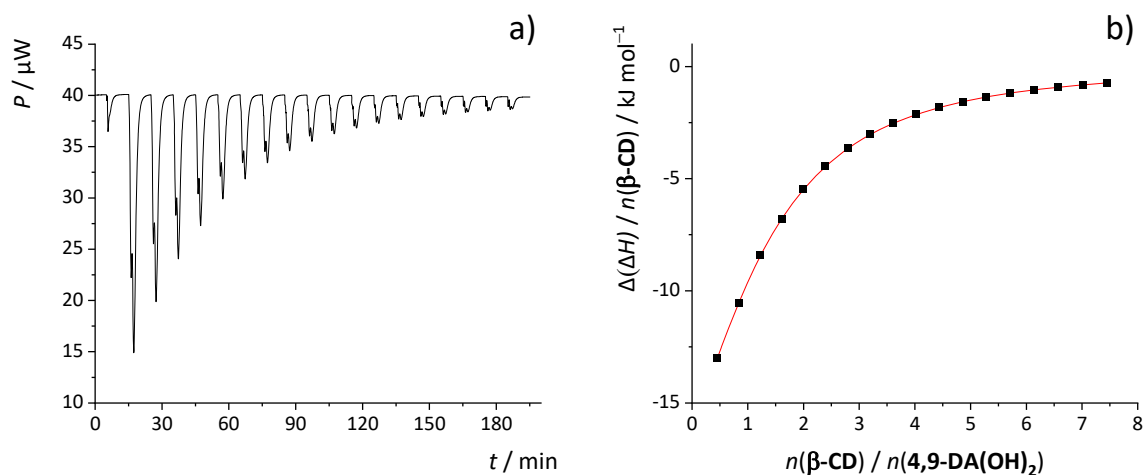

**Figure S84.** Microcalorimetric titration of 4,9-DA(OH)<sub>2</sub> ( $c_0 = 5 \cdot 10^{-4} \text{ mol dm}^{-3}$ ,  $V_0 = 1.45 \text{ mL}$ ) with  $\beta$ -CD ( $c = 2 \cdot 10^{-2} \text{ mol dm}^{-3}$ ) in EG at 278 K. a) Thermogram. b) The dependence of normalized successive enthalpy changes on host to guest molar ratio. ■ experimental; — calculated. The peculiar  $P(t)$  dependence is a consequence of slow heat compensation in ethylene glycol.

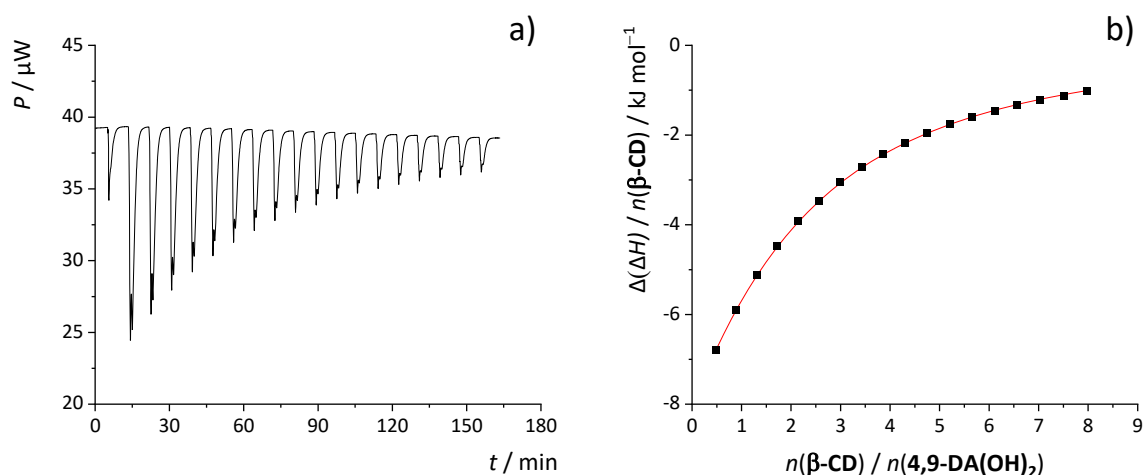

**Figure S85.** Microcalorimetric titration of 4,9-DA(OH)<sub>2</sub> ( $c_0 = 5 \cdot 10^{-4} \text{ mol dm}^{-3}$ ,  $V_0 = 1.45 \text{ mL}$ ) with  $\beta$ -CD ( $c = 2 \cdot 10^{-2} \text{ mol dm}^{-3}$ ) in EG at 298 K. a) Thermogram. b) The dependence of normalized successive enthalpy changes on host to guest molar ratio. ■ experimental; — calculated. The peculiar  $P(t)$  dependence is a consequence of slow heat compensation in ethylene glycol.

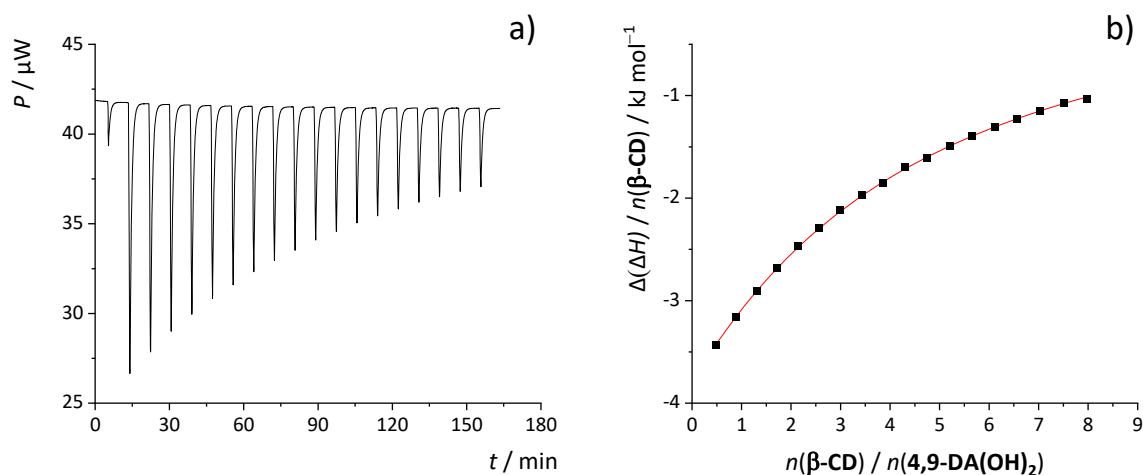

**Figure S86.** Microcalorimetric titration of 4,9-DA(OH)<sub>2</sub> ( $c_0 = 3 \cdot 10^{-4} \text{ mol dm}^{-3}$ ,  $V_0 = 1.45 \text{ mL}$ ) with  $\beta$ -CD ( $c = 2 \cdot 10^{-2} \text{ mol dm}^{-3}$ ) in EG at 318 K. a) Thermogram. b) The dependence of normalized successive enthalpy changes on host to guest molar ratio. ■ experimental; — calculated.

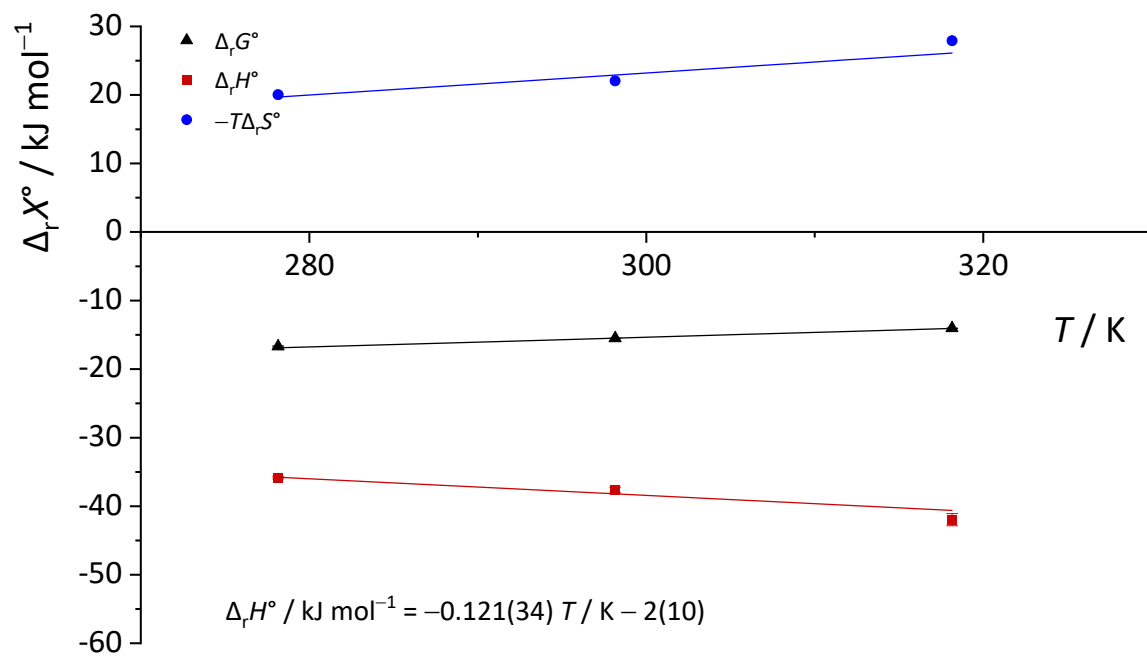

Figure S87. The temperature dependence of standard complexation parameters of 4,9-DA(OH)<sub>2</sub> with  $\beta$ -CD in EG.

**Table S7.** Thermodynamic parameters for complexation of diamantane alcohols with  $\beta$ -CD in EG.<sup>[a]</sup>

| GUEST · $\beta$ -CD           | $T / \text{K}$ | $\log K^\circ$ | $\Delta_r G^\circ / \text{kJ mol}^{-1}$ | $\Delta_r H^\circ / \text{kJ mol}^{-1}$ | $-T\Delta_r S^\circ / \text{kJ mol}^{-1}$ | $\Delta_r C_p^\circ / \text{J K}^{-1} \text{mol}^{-1}$ |
|-------------------------------|----------------|----------------|-----------------------------------------|-----------------------------------------|-------------------------------------------|--------------------------------------------------------|
| <b>1-DAOH</b>                 | 288            | 2.41(1)        | -13.28(6)                               | -38(1)                                  | 25(1)                                     |                                                        |
| <b>4-DAOH</b>                 | 278            | 3.42(1)        | -18.2(1)                                | -30.4(7)                                | 12.8(6)                                   | -279(58)                                               |
|                               | 288            | 2.98(7)        | -16.4(4)                                | -35(1)                                  | 19(1)                                     |                                                        |
|                               | 298            | 2.91(2)        | -16.6(1)                                | -38(1)                                  | 22(1)                                     |                                                        |
|                               | 308            | 2.69(1)        | -15.86(4)                               | -37.7(7)                                | 21.8(7)                                   |                                                        |
|                               | 318            | 2.44(1)        | -13.00(1)                               | -44(1)                                  | 26(1)                                     |                                                        |
| <b>4,9-DA(OH)<sub>2</sub></b> | 278            | 3.13(2)        | -16.7(9)                                | -35.8(2)                                | 20.0(4)                                   | -121(34)                                               |
|                               | 298            | 2.72(1)        | -15.51(2)                               | -37.6(4)                                | 22.1(4)                                   |                                                        |
|                               | 318            | 2.31(1)        | -14.04(3)                               | -42.0(9)                                | 27.9(9)                                   |                                                        |

[a] Uncertainties of the last digit(s) are given in parentheses as standard errors of the mean ( $N = 3-5$ ), or standard deviations obtained by weighted linear regression analysis (for  $\Delta_r C_p^\circ$  values).

Even though larger thermal noise was in some cases associated with experiments carried out at 278 and 338 K, or that complexation enthalpy was occasionally close to zero, the obtained linear  $\Delta_r H^\circ(T)$  dependencies and the standard errors of the mean obtained by repetitive titration experiments indicate the reliability of determined thermodynamic complexation parameters



## Geometries of studied CD complexes

**Table S8.** Geometries of the studied CD complexes with diamondoid alcohols in Cartesian coordinates in Å obtained from CREST/GFN2-xTB computations with included ALPB(water) solvation.

| <b>1-AdOH·<math>\beta</math>-CD</b> |              |              |              |
|-------------------------------------|--------------|--------------|--------------|
| 6                                   | 1.656278710  | 0.014408140  | 1.622611659  |
| 1                                   | 1.863378441  | -0.414938465 | 2.605083301  |
| 1                                   | 2.578367949  | 0.464913345  | 1.247373231  |
| 6                                   | 0.562252904  | 1.075978323  | 1.742151846  |
| 1                                   | 0.885365952  | 1.858549015  | 2.436738234  |
| 6                                   | -0.721717738 | 0.437704627  | 2.268788087  |
| 1                                   | -1.514722313 | 1.182784872  | 2.359323640  |
| 1                                   | -0.564271320 | -0.001544021 | 3.255103719  |
| 6                                   | -1.182516404 | -0.658865314 | 1.305487602  |
| 8                                   | -2.372508124 | -1.222439753 | 1.845018522  |
| 6                                   | -1.437855033 | -0.046749273 | -0.074610587 |
| 1                                   | -1.768246723 | -0.830653836 | -0.763856906 |
| 1                                   | -2.237403134 | 0.695671615  | 0.005933128  |
| 6                                   | -0.082778990 | -1.721784254 | 1.194444649  |
| 1                                   | 0.089352786  | -2.149315166 | 2.185047111  |
| 1                                   | -0.409478851 | -2.530993560 | 0.536067268  |
| 6                                   | 1.197405435  | -1.081716438 | 0.660988151  |
| 1                                   | 1.973637469  | -1.850743077 | 0.577938812  |
| 6                                   | 0.934185903  | -0.471009307 | -0.715792535 |
| 1                                   | 1.852937693  | -0.021750440 | -1.101507514 |
| 1                                   | 0.620088718  | -1.247020747 | -1.418888804 |
| 6                                   | -0.154198173 | 0.597010093  | -0.598367819 |
| 1                                   | -0.346351740 | 1.034021583  | -1.584996767 |
| 6                                   | 0.296072031  | 1.691202767  | 0.369004478  |
| 1                                   | 1.206427230  | 2.170387860  | 0.000334155  |
| 6                                   | 2.475024363  | 5.583264414  | -0.323580719 |
| 1                                   | 3.389313866  | 6.128460144  | -0.590369105 |
| 8                                   | 2.757933614  | 4.238944654  | -0.030529088 |
| 6                                   | 1.815592520  | 6.218018595  | 0.913550770  |
| 1                                   | 1.590490208  | 7.269228947  | 0.697999659  |
| 8                                   | 2.643729847  | 6.211401571  | 2.040779267  |
| 1                                   | 3.195808617  | 5.405596211  | 2.057945268  |
| 6                                   | 0.501533461  | 5.467670237  | 1.172844918  |
| 1                                   | 0.728090708  | 4.407741202  | 1.356366025  |
| 8                                   | -0.201701787 | 6.005019627  | 2.266765863  |
| 1                                   | 0.440378128  | 6.220773376  | 2.962701238  |
| 6                                   | -0.386134102 | 5.580261805  | -0.070213096 |
| 1                                   | -0.671025614 | 6.631934051  | -0.203814421 |
| 6                                   | 0.359708182  | 5.100227469  | -1.326621500 |
| 1                                   | 0.464095503  | 4.009844634  | -1.272698298 |
| 8                                   | 1.645129883  | 5.706347132  | -1.443988983 |
| 6                                   | -0.407603860 | 5.489437236  | -2.599850315 |
| 1                                   | -1.423944439 | 5.096074301  | -2.541503402 |
| 1                                   | 0.103625173  | 5.056432242  | -3.467059952 |
| 8                                   | -0.526308863 | 6.880730584  | -2.733981687 |
| 1                                   | 0.363375790  | 7.253199532  | -2.823852723 |
| 6                                   | 5.836207929  | 1.486080569  | -0.374583845 |
| 1                                   | 6.824736615  | 1.106509749  | -0.662466932 |
| 8                                   | 5.008881479  | 0.441864994  | 0.073013688  |
| 6                                   | 5.972982130  | 2.515122149  | 0.762684475  |
| 1                                   | 6.658732890  | 3.309250832  | 0.445434618  |
| 8                                   | 6.519672564  | 1.962153342  | 1.925592088  |
| 1                                   | 6.166836649  | 1.063879754  | 2.077957742  |
| 6                                   | 4.590139665  | 3.128623688  | 1.025746482  |
| 1                                   | 3.897358325  | 2.333165354  | 1.339238995  |
| 8                                   | 4.648175995  | 4.127440180  | 2.013994226  |
| 1                                   | 5.243488544  | 3.823087206  | 2.718607004  |
| 6                                   | 4.068879179  | 3.753999982  | -0.272010521 |
| 1                                   | 4.730906673  | 4.579955334  | -0.561074732 |
| 6                                   | 4.057536488  | 2.706227462  | -1.397349872 |
| 1                                   | 3.295208781  | 1.950703395  | -1.165167920 |
| 8                                   | 5.330270680  | 2.081770646  | -1.535903640 |
| 6                                   | 3.752702676  | 3.359790260  | -2.753585130 |
| 1                                   | 2.817259055  | 3.917339245  | -2.681476804 |

---

|   |              |              |              |
|---|--------------|--------------|--------------|
| 1 | 3.652806315  | 2.574360063  | -3.511470510 |
| 8 | 4.739792819  | 4.285840340  | -3.119750820 |
| 1 | 5.580095032  | 3.813207082  | -3.214794206 |
| 6 | 4.923713201  | -3.695743393 | 0.073941267  |
| 1 | 5.286877388  | -4.720657685 | -0.074783749 |
| 8 | 3.548939911  | -3.685981307 | 0.359804432  |
| 6 | 5.654328176  | -3.036810020 | 1.258200044  |
| 1 | 6.735227424  | -3.076484705 | 1.080783681  |
| 8 | 5.423857354  | -3.705520974 | 2.466008190  |
| 1 | 4.503974424  | -4.029746097 | 2.505820597  |
| 6 | 5.214096074  | -1.566977785 | 1.335454330  |
| 1 | 4.132194104  | -1.528377630 | 1.524498842  |
| 8 | 5.902225255  | -0.870764763 | 2.345925531  |
| 1 | 5.957056758  | -1.444504733 | 3.127213170  |
| 6 | 5.507835262  | -0.884345222 | -0.003613838 |
| 1 | 6.594199261  | -0.868515825 | -0.159616809 |
| 6 | 4.849212085  | -1.656241918 | -1.158535388 |
| 1 | 3.760050725  | -1.554018310 | -1.073557591 |
| 8 | 5.210635023  | -3.035014127 | -1.125866146 |
| 6 | 5.319530935  | -1.124293925 | -2.520536214 |
| 1 | 5.097123266  | -0.057867522 | -2.587166094 |
| 1 | 4.782195829  | -1.658690638 | -3.312093652 |
| 8 | 6.707208914  | -1.253035751 | -2.682248045 |
| 1 | 6.928196336  | -2.196099235 | -2.674194970 |
| 6 | 0.229800855  | -6.135269502 | 0.068593404  |
| 1 | -0.345400037 | -7.050763060 | -0.122082095 |
| 8 | -0.623401733 | -5.039034451 | 0.264006595  |
| 6 | 1.083400012  | -6.305885398 | 1.336110831  |
| 1 | 1.726679362  | -7.186285225 | 1.217152567  |
| 8 | 0.306282090  | -6.524439287 | 2.479665115  |
| 1 | -0.557466428 | -6.079256957 | 2.396026098  |
| 6 | 1.971506017  | -5.061278556 | 1.485874294  |
| 1 | 1.328613086  | -4.177332556 | 1.602076901  |
| 8 | 2.842705578  | -5.170971919 | 2.584635373  |
| 1 | 2.346880236  | -5.549715379 | 3.328408248  |
| 6 | 2.817249781  | -4.892772133 | 0.219122522  |
| 1 | 3.505559714  | -5.743420894 | 0.134218997  |
| 6 | 1.915492199  | -4.847998306 | -1.024701107 |
| 1 | 1.333287069  | -3.917664257 | -0.998368898 |
| 8 | 1.036724372  | -5.971835522 | -1.064260772 |
| 6 | 2.739644756  | -4.909800651 | -2.318965776 |
| 1 | 3.471244757  | -4.100404331 | -2.318659386 |
| 1 | 2.063465571  | -4.788445453 | -3.173304897 |
| 8 | 3.468122333  | -6.104447926 | -2.419035342 |
| 1 | 2.841384129  | -6.841753561 | -2.460364269 |
| 6 | -4.546773316 | -3.895072569 | -0.455369559 |
| 1 | -5.570535963 | -4.000678587 | -0.834833998 |
| 8 | -4.314014359 | -2.578244420 | -0.013918243 |
| 6 | -4.323913550 | -4.859947684 | 0.724645534  |
| 1 | -4.578759303 | -5.875345710 | 0.397826100  |
| 8 | -5.154458370 | -4.575949748 | 1.813558842  |
| 1 | -5.235650077 | -3.611346061 | 1.946626659  |
| 6 | -2.839418562 | -4.830245374 | 1.120486244  |
| 1 | -2.577081604 | -3.825543014 | 1.481471993  |
| 8 | -2.549624981 | -5.780057798 | 2.118413141  |
| 1 | -3.252957969 | -5.741971682 | 2.786571626  |
| 6 | -1.986039042 | -5.164788735 | -0.108793840 |
| 1 | -2.201246622 | -6.198047798 | -0.409749397 |
| 6 | -2.327638935 | -4.218552211 | -1.272032374 |
| 1 | -2.008233632 | -3.201593484 | -1.005094442 |
| 8 | -3.726654801 | -4.222101382 | -1.541887694 |
| 6 | -1.621811732 | -4.647916138 | -2.566641233 |
| 1 | -2.163856054 | -5.503837600 | -2.982429394 |
| 1 | -0.600066089 | -4.949553319 | -2.332035810 |
| 8 | -1.515875711 | -3.606614194 | -3.500698578 |
| 1 | -2.386094535 | -3.430458584 | -3.883702231 |
| 6 | -6.002988935 | 1.171229402  | -0.243342905 |
| 1 | -6.728021054 | 1.966528198  | -0.457422914 |
| 8 | -4.747747167 | 1.709074012  | 0.090866601  |
| 6 | -6.491905858 | 0.307232499  | 0.934545699  |
| 1 | -7.478331829 | -0.103611625 | 0.691325658  |

---

|   |              |              |              |
|---|--------------|--------------|--------------|
| 8 | -6.654009598 | 1.050644399  | 2.109068061  |
| 1 | -5.908190450 | 1.670204798  | 2.223421161  |
| 6 | -5.493844119 | -0.844580889 | 1.124991495  |
| 1 | -4.521406943 | -0.418978809 | 1.407959069  |
| 8 | -5.925667673 | -1.755578584 | 2.109203172  |
| 1 | -6.207382179 | -1.251345958 | 2.888299228  |
| 6 | -5.352754656 | -1.620801469 | -0.187902046 |
| 1 | -6.301823082 | -2.133825448 | -0.389226005 |
| 6 | -5.031663229 | -0.684059861 | -1.363760927 |
| 1 | -4.007928050 | -0.310055563 | -1.245558207 |
| 8 | -5.937057789 | 0.414721703  | -1.418522458 |
| 6 | -5.166432848 | -1.419264599 | -2.704992958 |
| 1 | -4.501714351 | -2.284689222 | -2.704590340 |
| 1 | -4.879678067 | -0.734986132 | -3.511153071 |
| 8 | -6.463394177 | -1.914540274 | -2.906613747 |
| 1 | -7.072252631 | -1.162857607 | -2.954130379 |
| 6 | -2.800868102 | 5.374100326  | -0.052702125 |
| 1 | -2.707054380 | 6.454861659  | -0.219590283 |
| 8 | -1.543123148 | 4.788384395  | 0.156870606  |
| 6 | -3.666922762 | 5.103081291  | 1.190515436  |
| 1 | -4.636482950 | 5.600051467  | 1.065621339  |
| 8 | -3.103904711 | 5.616219500  | 2.363872556  |
| 1 | -2.129298534 | 5.562203212  | 2.331794314  |
| 6 | -3.901273939 | 3.588020275  | 1.292393259  |
| 1 | -2.930402226 | 3.079637742  | 1.398376749  |
| 8 | -4.731757704 | 3.264010667  | 2.378653862  |
| 1 | -4.487078376 | 3.832265864  | 3.127522124  |
| 6 | -4.573002150 | 3.112469246  | 0.000630364  |
| 1 | -5.548262957 | 3.607064918  | -0.093126656 |
| 6 | -3.704536971 | 3.490694801  | -1.211296510 |
| 1 | -2.770420035 | 2.914463722  | -1.171233416 |
| 8 | -3.414484910 | 4.886197942  | -1.212971313 |
| 6 | -4.438758836 | 3.208801103  | -2.530748304 |
| 1 | -4.734689873 | 2.158859177  | -2.562031982 |
| 1 | -3.760305511 | 3.422356192  | -3.364486357 |
| 8 | -5.618992101 | 3.958480443  | -2.641813198 |
| 1 | -5.382497325 | 4.897810550  | -2.655011375 |
| 1 | -0.479714656 | 2.457583331  | 0.446557730  |
| 1 | -2.814263386 | -1.745524553 | 1.158748785  |

#### 1-DAOH- $\beta$ -CD

|   |              |              |              |
|---|--------------|--------------|--------------|
| 6 | -0.418700000 | -1.145100000 | -2.035700000 |
| 1 | -0.692800000 | -1.923500000 | -2.757600000 |
| 6 | -0.132400000 | -1.789300000 | -0.682500000 |
| 6 | -1.570400000 | -0.142700000 | -1.913300000 |
| 1 | -2.467800000 | -0.659600000 | -1.550100000 |
| 6 | -1.860300000 | 0.486500000  | -3.275300000 |
| 1 | -2.688100000 | 1.194100000  | -3.190900000 |
| 1 | -2.151700000 | -0.289400000 | -3.986500000 |
| 6 | -0.613200000 | 1.210500000  | -3.778300000 |
| 1 | -0.819600000 | 1.664700000  | -4.753300000 |
| 6 | -0.221800000 | 2.299100000  | -2.782300000 |
| 1 | 0.672400000  | 2.816000000  | -3.136700000 |
| 1 | -1.026400000 | 3.032000000  | -2.691400000 |
| 6 | 0.540100000  | 0.218700000  | -3.910800000 |
| 1 | 0.286200000  | -0.562100000 | -4.630900000 |
| 1 | 1.437300000  | 0.731800000  | -4.259800000 |
| 6 | 0.823500000  | -0.413400000 | -2.549100000 |
| 1 | 1.659600000  | -1.116100000 | -2.643800000 |
| 6 | 1.221800000  | 0.668500000  | -1.533800000 |
| 6 | 1.493100000  | 0.028300000  | -0.167400000 |
| 8 | 2.402700000  | 1.295500000  | -2.022500000 |
| 6 | 0.061000000  | 1.671600000  | -1.417900000 |
| 1 | 0.339800000  | 2.465000000  | -0.711100000 |
| 6 | -1.177700000 | 0.935200000  | -0.898900000 |
| 6 | -0.894500000 | 0.297600000  | 0.461100000  |
| 6 | -3.701100000 | -4.920300000 | 0.136400000  |
| 1 | -3.806200000 | -5.978900000 | 0.410300000  |
| 8 | -2.378200000 | -4.620200000 | -0.195900000 |
| 6 | -4.586100000 | -4.624600000 | -1.087300000 |
| 1 | -5.605700000 | -4.973400000 | -0.865000000 |
| 8 | -4.051300000 | -5.323900000 | -2.178200000 |
| 1 | -4.547200000 | -5.064000000 | -2.971200000 |

|   |              |              |              |
|---|--------------|--------------|--------------|
| 6 | -4.645500000 | -3.115100000 | -1.340200000 |
| 1 | -3.650100000 | -2.763900000 | -1.651600000 |
| 8 | -5.588300000 | -2.896400000 | -2.359800000 |
| 1 | -5.774000000 | -1.943100000 | -2.434300000 |
| 6 | -5.032300000 | -2.387900000 | -0.041800000 |
| 1 | -6.050800000 | -2.686300000 | 0.241000000  |
| 6 | -4.067300000 | -2.789900000 | 1.085800000  |
| 1 | -3.048300000 | -2.509300000 | 0.786000000  |
| 8 | -4.132400000 | -4.204200000 | 1.260900000  |
| 6 | -4.377300000 | -2.135000000 | 2.444700000  |
| 1 | -4.673200000 | -2.933700000 | 3.135200000  |
| 1 | -5.204400000 | -1.429800000 | 2.341300000  |
| 8 | -3.300600000 | -1.393600000 | 2.950200000  |
| 1 | -2.553600000 | -1.995400000 | 3.131600000  |
| 6 | 1.447500000  | -6.002700000 | 0.560000000  |
| 1 | 2.218100000  | -6.694500000 | 0.925900000  |
| 8 | 2.018600000  | -4.800900000 | 0.130600000  |
| 6 | 0.718000000  | -6.639800000 | -0.634300000 |
| 1 | 0.357400000  | -7.632800000 | -0.327700000 |
| 8 | 1.639100000  | -6.749700000 | -1.685600000 |
| 1 | 1.160300000  | -7.058900000 | -2.471200000 |
| 6 | -0.494600000 | -5.785700000 | -1.014100000 |
| 1 | -0.144300000 | -4.820100000 | -1.407000000 |
| 8 | -1.215600000 | -6.486800000 | -1.996700000 |
| 1 | -2.073500000 | -6.049700000 | -2.141100000 |
| 6 | -1.358200000 | -5.510400000 | 0.228300000  |
| 1 | -1.795000000 | -6.456600000 | 0.575200000  |
| 6 | -0.493500000 | -4.912300000 | 1.352000000  |
| 1 | -0.073500000 | -3.963900000 | 0.995300000  |
| 8 | 0.576600000  | -5.813700000 | 1.641400000  |
| 6 | -1.253000000 | -4.652000000 | 2.665500000  |
| 1 | -0.870600000 | -5.353600000 | 3.415700000  |
| 1 | -2.321100000 | -4.827200000 | 2.525600000  |
| 8 | -1.139600000 | -3.323400000 | 3.108000000  |
| 1 | -0.206000000 | -3.120600000 | 3.304400000  |
| 6 | 5.396400000  | -2.491500000 | 0.815100000  |
| 1 | 6.385400000  | -2.269200000 | 1.235000000  |
| 8 | 4.855900000  | -1.357600000 | 0.191800000  |
| 6 | 5.524900000  | -3.617500000 | -0.227600000 |
| 1 | 6.044800000  | -4.466300000 | 0.240300000  |
| 8 | 6.264900000  | -3.122100000 | -1.311700000 |
| 1 | 6.276200000  | -3.808100000 | -1.998600000 |
| 6 | 4.130400000  | -4.080400000 | -0.654700000 |
| 1 | 3.615700000  | -3.248800000 | -1.159800000 |
| 8 | 4.289100000  | -5.168700000 | -1.529500000 |
| 1 | 3.425800000  | -5.592900000 | -1.680100000 |
| 6 | 3.319600000  | -4.469600000 | 0.588900000  |
| 1 | 3.793100000  | -5.341200000 | 1.060400000  |
| 6 | 3.290400000  | -3.303600000 | 1.593500000  |
| 1 | 2.745600000  | -2.467200000 | 1.135400000  |
| 8 | 4.621300000  | -2.894700000 | 1.908300000  |
| 6 | 2.612000000  | -3.693200000 | 2.920300000  |
| 1 | 3.400700000  | -3.872100000 | 3.657200000  |
| 1 | 2.037300000  | -4.610400000 | 2.783300000  |
| 8 | 1.690000000  | -2.733700000 | 3.374500000  |
| 1 | 2.159200000  | -1.967700000 | 3.731200000  |
| 6 | 5.424400000  | 2.717200000  | 0.030300000  |
| 1 | 5.951700000  | 3.678200000  | 0.103500000  |
| 8 | 4.055900000  | 2.926300000  | -0.185900000 |
| 6 | 6.004200000  | 1.922600000  | -1.150900000 |
| 1 | 7.097800000  | 1.885900000  | -1.026400000 |
| 8 | 5.668100000  | 2.611400000  | -2.325600000 |
| 1 | 5.914500000  | 2.054300000  | -3.080100000 |
| 6 | 5.487200000  | 0.480400000  | -1.153400000 |
| 1 | 4.430400000  | 0.473700000  | -1.454500000 |
| 8 | 6.263300000  | -0.229800000 | -2.093500000 |
| 1 | 6.160200000  | -1.185100000 | -1.937700000 |
| 6 | 5.603600000  | -0.148900000 | 0.241400000  |
| 1 | 6.661600000  | -0.366000000 | 0.442300000  |
| 6 | 5.072100000  | 0.781200000  | 1.343300000  |
| 1 | 3.984400000  | 0.871500000  | 1.247300000  |
| 8 | 5.672100000  | 2.072900000  | 1.244800000  |
| 6 | 5.412000000  | 0.252500000  | 2.742400000  |
| 1 | 4.995200000  | -0.749000000 | 2.857300000  |
| 1 | 4.960400000  | 0.921700000  | 3.483000000  |

|   |              |              |              |
|---|--------------|--------------|--------------|
| 8 | 6.797600000  | 0.133200000  | 2.942800000  |
| 1 | 7.189900000  | 1.016100000  | 2.877700000  |
| 6 | 1.230800000  | 5.900700000  | 0.407000000  |
| 1 | 0.853300000  | 6.878500000  | 0.734800000  |
| 8 | 0.183500000  | 5.063700000  | 0.017200000  |
| 6 | 2.165800000  | 6.094000000  | -0.799000000 |
| 1 | 2.936300000  | 6.828400000  | -0.520800000 |
| 8 | 1.388200000  | 6.569000000  | -1.863100000 |
| 1 | 1.953700000  | 6.617600000  | -2.650300000 |
| 6 | 2.863900000  | 4.770600000  | -1.132700000 |
| 1 | 2.110100000  | 4.058100000  | -1.496900000 |
| 8 | 3.817900000  | 5.033900000  | -2.131300000 |
| 1 | 4.334600000  | 4.227600000  | -2.308700000 |
| 6 | 3.519500000  | 4.201000000  | 0.138200000  |
| 1 | 4.320100000  | 4.882600000  | 0.453600000  |
| 6 | 2.484100000  | 4.096700000  | 1.268800000  |
| 1 | 1.684100000  | 3.416400000  | 0.944100000  |
| 8 | 1.928000000  | 5.387000000  | 1.510800000  |
| 6 | 3.062300000  | 3.575400000  | 2.598300000  |
| 1 | 2.915400000  | 4.358100000  | 3.351600000  |
| 1 | 4.131700000  | 3.381700000  | 2.492700000  |
| 8 | 2.489300000  | 2.361000000  | 3.001000000  |
| 1 | 1.545800000  | 2.502200000  | 3.203700000  |
| 6 | -3.845000000 | 4.447800000  | 0.757800000  |
| 1 | -4.830400000 | 4.653700000  | 1.193800000  |
| 8 | -3.839600000 | 3.205700000  | 0.105400000  |
| 6 | -3.497400000 | 5.542300000  | -0.268100000 |
| 1 | -3.606100000 | 6.522700000  | 0.217500000  |
| 8 | -4.390700000 | 5.419000000  | -1.343300000 |
| 1 | -4.129800000 | 6.062400000  | -2.021800000 |
| 6 | -2.043600000 | 5.379700000  | -0.717000000 |
| 1 | -1.941600000 | 4.424600000  | -1.253200000 |
| 8 | -1.730700000 | 6.458400000  | -1.562300000 |
| 1 | -0.778800000 | 6.445800000  | -1.762900000 |
| 6 | -1.120200000 | 5.338000000  | 0.508800000  |
| 1 | -1.144700000 | 6.315800000  | 1.007700000  |
| 6 | -1.590400000 | 4.251200000  | 1.492300000  |
| 1 | -1.486000000 | 3.276300000  | 0.998000000  |
| 8 | -2.957900000 | 4.463400000  | 1.838700000  |
| 6 | -0.787300000 | 4.252600000  | 2.806300000  |
| 1 | -1.411100000 | 4.714800000  | 3.577100000  |
| 1 | 0.120700000  | 4.844800000  | 2.682300000  |
| 8 | -0.358000000 | 2.969400000  | 3.192100000  |
| 1 | -1.104000000 | 2.464000000  | 3.542900000  |
| 6 | -6.116200000 | -0.231400000 | -0.032500000 |
| 1 | -7.005500000 | -0.869400000 | 0.064700000  |
| 8 | -4.982100000 | -0.997400000 | -0.315700000 |
| 6 | -6.329800000 | 0.763300000  | -1.185000000 |
| 1 | -7.267700000 | 1.308400000  | -1.001400000 |
| 8 | -6.412600000 | 0.026200000  | -2.374800000 |
| 1 | -6.456700000 | 0.654300000  | -3.113100000 |
| 6 | -5.178800000 | 1.773400000  | -1.206400000 |
| 1 | -4.249800000 | 1.238500000  | -1.453100000 |
| 8 | -5.463300000 | 2.736900000  | -2.191900000 |
| 1 | -5.026700000 | 3.576500000  | -1.961500000 |
| 6 | -5.013100000 | 2.409600000  | 0.177800000  |
| 1 | -5.886500000 | 3.041500000  | 0.388900000  |
| 6 | -4.902400000 | 1.332000000  | 1.268700000  |
| 1 | -3.967800000 | 0.775100000  | 1.130900000  |
| 8 | -6.011900000 | 0.436800000  | 1.192100000  |
| 6 | -4.933600000 | 1.935700000  | 2.678100000  |
| 1 | -4.121900000 | 2.657400000  | 2.777800000  |
| 1 | -4.793200000 | 1.125700000  | 3.402300000  |
| 8 | -6.124300000 | 2.639700000  | 2.925700000  |
| 1 | -6.860600000 | 2.012100000  | 2.886200000  |
| 1 | -2.000800000 | 1.653900000  | -0.795900000 |
| 6 | 0.248400000  | -0.706600000 | 0.324900000  |
| 1 | 0.451300000  | -1.164300000 | 1.298700000  |
| 1 | 1.772500000  | 0.809100000  | 0.547400000  |
| 1 | 2.341600000  | -0.656100000 | -0.262100000 |
| 1 | 0.685000000  | -2.510200000 | -0.779700000 |
| 1 | -1.019600000 | -2.327800000 | -0.340200000 |
| 1 | -1.790800000 | -0.204100000 | 0.833800000  |
| 1 | -0.617100000 | 1.067400000  | 1.184900000  |
| 1 | 2.753400000  | 1.889000000  | -1.340800000 |

---

**4-DAOH- $\beta$ -CD**

---

|   |              |              |              |
|---|--------------|--------------|--------------|
| 6 | -0.335800000 | 0.815000000  | -2.835300000 |
| 1 | -0.389600000 | 0.944600000  | -3.922300000 |
| 6 | -0.875300000 | 2.066800000  | -2.151300000 |
| 6 | 1.120200000  | 0.578300000  | -2.426500000 |
| 1 | 1.725900000  | 1.440800000  | -2.726400000 |
| 6 | 1.658300000  | -0.671400000 | -3.119400000 |
| 1 | 2.700400000  | -0.841500000 | -2.843200000 |
| 1 | 1.613300000  | -0.543000000 | -4.204000000 |
| 6 | 0.824900000  | -1.888800000 | -2.705700000 |
| 8 | 1.340600000  | -3.085000000 | -3.271800000 |
| 6 | 0.896200000  | -2.050700000 | -1.186100000 |
| 1 | 0.314900000  | -2.928100000 | -0.893300000 |
| 1 | 1.935200000  | -2.226500000 | -0.896700000 |
| 6 | -0.631200000 | -1.655400000 | -3.123800000 |
| 1 | -0.689000000 | -1.533800000 | -4.208500000 |
| 1 | -1.230800000 | -2.525400000 | -2.850300000 |
| 6 | -1.167000000 | -0.405100000 | -2.430900000 |
| 1 | -2.208900000 | -0.246600000 | -2.731900000 |
| 6 | -1.102200000 | -0.568900000 | -0.910000000 |
| 6 | -1.641400000 | 0.682500000  | -0.220500000 |
| 1 | -1.705700000 | -1.436800000 | -0.613200000 |
| 6 | 0.356000000  | -0.800900000 | -0.503100000 |
| 1 | 0.412200000  | -0.936600000 | 0.584400000  |
| 6 | 1.188200000  | 0.420200000  | -0.905300000 |
| 6 | 0.642700000  | 1.668800000  | -0.215000000 |
| 6 | -5.252800000 | -2.781100000 | 0.173800000  |
| 1 | -5.769700000 | -3.733600000 | 0.349300000  |
| 8 | -3.896300000 | -3.001000000 | -0.123000000 |
| 6 | -5.896000000 | -2.046400000 | -1.016600000 |
| 1 | -6.972100000 | -1.945600000 | -0.830500000 |
| 8 | -5.763400000 | -2.752500000 | -2.217600000 |
| 1 | -4.913100000 | -3.229400000 | -2.241500000 |
| 6 | -5.277600000 | -0.643700000 | -1.115700000 |
| 1 | -4.196700000 | -0.748000000 | -1.292100000 |
| 8 | -5.860100000 | 0.113000000  | -2.148100000 |
| 1 | -6.049200000 | -0.482100000 | -2.891800000 |
| 6 | -5.502500000 | 0.088800000  | 0.212200000  |
| 1 | -6.582000000 | 0.202800000  | 0.375700000  |
| 6 | -4.907000000 | -0.734300000 | 1.366700000  |
| 1 | -3.815200000 | -0.756600000 | 1.257200000  |
| 8 | -5.424500000 | -2.063400000 | 1.362000000  |
| 6 | -5.289500000 | -0.143100000 | 2.732000000  |
| 1 | -4.960800000 | 0.896000000  | 2.781800000  |
| 1 | -4.792300000 | -0.722300000 | 3.518500000  |
| 8 | -6.679000000 | -0.130700000 | 2.924100000  |
| 1 | -6.993600000 | -1.046900000 | 2.926100000  |
| 6 | -1.089500000 | -6.044300000 | 0.272500000  |
| 1 | -0.721400000 | -7.045700000 | 0.530700000  |
| 8 | -0.028200000 | -5.184000000 | -0.037900000 |
| 6 | -2.006700000 | -6.113200000 | -0.960300000 |
| 1 | -2.818900000 | -6.824300000 | -0.766700000 |
| 8 | -1.334600000 | -6.566500000 | -2.101300000 |
| 1 | -0.393600000 | -6.312700000 | -2.066000000 |
| 6 | -2.610000000 | -4.717200000 | -1.181100000 |
| 1 | -1.789000000 | -4.003900000 | -1.349800000 |
| 8 | -3.494000000 | -4.694300000 | -2.273700000 |
| 1 | -3.150000000 | -5.295200000 | -2.954700000 |
| 6 | -3.374800000 | -4.305600000 | 0.081500000  |
| 1 | -4.196900000 | -5.014800000 | 0.243300000  |
| 6 | -2.434900000 | -4.350500000 | 1.297700000  |
| 1 | -1.680500000 | -3.559300000 | 1.188200000  |
| 8 | -1.798200000 | -5.621600000 | 1.404800000  |
| 6 | -3.209800000 | -4.163800000 | 2.611200000  |
| 1 | -3.779800000 | -3.234900000 | 2.566800000  |
| 1 | -2.493400000 | -4.115500000 | 3.439400000  |
| 8 | -4.141500000 | -5.191600000 | 2.816100000  |
| 1 | -3.659300000 | -6.028500000 | 2.890900000  |
| 6 | 4.017900000  | -4.667200000 | 0.483300000  |
| 1 | 5.048400000  | -4.859500000 | 0.810000000  |
| 8 | 3.886300000  | -3.357400000 | -0.006100000 |
| 6 | 3.630800000  | -5.649300000 | -0.639100000 |
| 1 | 3.798600000  | -6.672900000 | -0.285200000 |
| 8 | 4.437800000  | -5.486500000 | -1.772100000 |

|   |              |              |              |
|---|--------------|--------------|--------------|
| 1 | 4.550700000  | -4.538100000 | -1.964000000 |
| 6 | 2.142300000  | -5.470800000 | -0.972400000 |
| 1 | 1.996900000  | -4.483700000 | -1.428400000 |
| 8 | 1.683500000  | -6.469900000 | -1.857800000 |
| 1 | 2.326900000  | -6.552400000 | -2.578500000 |
| 6 | 1.294500000  | -5.580200000 | 0.300800000  |
| 1 | 1.300500000  | -6.626700000 | 0.632800000  |
| 6 | 1.835400000  | -4.693500000 | 1.433000000  |
| 1 | 1.628700000  | -3.645400000 | 1.182300000  |
| 8 | 3.234700000  | -4.878600000 | 1.623500000  |
| 6 | 1.181400000  | -5.055700000 | 2.775600000  |
| 1 | 0.096500000  | -4.997400000 | 2.678000000  |
| 1 | 1.520100000  | -4.343400000 | 3.537100000  |
| 8 | 1.473800000  | -6.372100000 | 3.160600000  |
| 1 | 2.433700000  | -6.451800000 | 3.264000000  |
| 6 | 5.918000000  | 0.267600000  | 0.257900000  |
| 1 | 6.770900000  | 0.915200000  | 0.499700000  |
| 8 | 4.794300000  | 1.037200000  | -0.089400000 |
| 6 | 6.271600000  | -0.643200000 | -0.932000000 |
| 1 | 7.203400000  | -1.175500000 | -0.707100000 |
| 8 | 6.500200000  | 0.081200000  | -2.107800000 |
| 1 | 5.899500000  | 0.848600000  | -2.158300000 |
| 6 | 5.148100000  | -1.674400000 | -1.116300000 |
| 1 | 4.212500000  | -1.140400000 | -1.344300000 |
| 8 | 5.441400000  | -2.586900000 | -2.143400000 |
| 1 | 5.897100000  | -2.108500000 | -2.855100000 |
| 6 | 4.961700000  | -2.453700000 | 0.189800000  |
| 1 | 5.883000000  | -3.010300000 | 0.405900000  |
| 6 | 4.685200000  | -1.475100000 | 1.344100000  |
| 1 | 3.707300000  | -1.002500000 | 1.179300000  |
| 8 | 5.702900000  | -0.479600000 | 1.420700000  |
| 6 | 4.704000000  | -2.184900000 | 2.706500000  |
| 1 | 3.972300000  | -2.993700000 | 2.706300000  |
| 1 | 4.445200000  | -1.456800000 | 3.484100000  |
| 8 | 5.949100000  | -2.774500000 | 2.969900000  |
| 1 | 6.615200000  | -2.072400000 | 3.014000000  |
| 6 | 3.512200000  | 4.977600000  | 0.309000000  |
| 1 | 3.615800000  | 6.043400000  | 0.552100000  |
| 8 | 2.171600000  | 4.654300000  | 0.051600000  |
| 6 | 4.330800000  | 4.641300000  | -0.950600000 |
| 1 | 5.367300000  | 4.965500000  | -0.797500000 |
| 8 | 3.862300000  | 5.313600000  | -2.086100000 |
| 1 | 2.898200000  | 5.449300000  | -2.029400000 |
| 6 | 4.320400000  | 3.117600000  | -1.156300000 |
| 1 | 3.286400000  | 2.782000000  | -1.320700000 |
| 8 | 5.122900000  | 2.735600000  | -2.246300000 |
| 1 | 5.009100000  | 3.391300000  | -2.953300000 |
| 6 | 4.867600000  | 2.442000000  | 0.105100000  |
| 1 | 5.914400000  | 2.744800000  | 0.238400000  |
| 6 | 4.061900000  | 2.885800000  | 1.337200000  |
| 1 | 3.046200000  | 2.478300000  | 1.258600000  |
| 8 | 4.013700000  | 4.308300000  | 1.431100000  |
| 6 | 4.722100000  | 2.407200000  | 2.639300000  |
| 1 | 4.829500000  | 1.321900000  | 2.613200000  |
| 1 | 4.082500000  | 2.691300000  | 3.482900000  |
| 8 | 6.014000000  | 2.931600000  | 2.793700000  |
| 1 | 5.944500000  | 3.895500000  | 2.861500000  |
| 6 | -1.663000000 | 6.041800000  | 0.745300000  |
| 1 | -2.461600000 | 6.706400000  | 1.098900000  |
| 8 | -2.185400000 | 4.809300000  | 0.322200000  |
| 6 | -0.923100000 | 6.678000000  | -0.446000000 |
| 1 | -0.535700000 | 7.658400000  | -0.145600000 |
| 8 | -1.762400000 | 6.900800000  | -1.543200000 |
| 1 | -2.404800000 | 6.171400000  | -1.635600000 |
| 6 | 0.253800000  | 5.762500000  | -0.813400000 |
| 1 | -0.143800000 | 4.778300000  | -1.099200000 |
| 8 | 1.024500000  | 6.290400000  | -1.865900000 |
| 1 | 0.422300000  | 6.707900000  | -2.503100000 |
| 6 | 1.163600000  | 5.591000000  | 0.407400000  |
| 1 | 1.620100000  | 6.559300000  | 0.649900000  |
| 6 | 0.355800000  | 5.096900000  | 1.619600000  |
| 1 | 0.064500000  | 4.054600000  | 1.440300000  |
| 8 | -0.805400000 | 5.895200000  | 1.842100000  |
| 6 | 1.182100000  | 5.197300000  | 2.911100000  |
| 1 | 2.118800000  | 4.652600000  | 2.783800000  |

|   |              |              |              |
|---|--------------|--------------|--------------|
| 1 | 0.608600000  | 4.753500000  | 3.732900000  |
| 8 | 1.531200000  | 6.523500000  | 3.205600000  |
| 1 | 0.716400000  | 7.026400000  | 3.352600000  |
| 6 | -5.600700000 | 2.488500000  | 0.572300000  |
| 1 | -6.632800000 | 2.220100000  | 0.831800000  |
| 8 | -4.893400000 | 1.365800000  | 0.108500000  |
| 6 | -5.589500000 | 3.548600000  | -0.544800000 |
| 1 | -6.189800000 | 4.409300000  | -0.229100000 |
| 8 | -6.164200000 | 3.076300000  | -1.730900000 |
| 1 | -5.913000000 | 2.145600000  | -1.882200000 |
| 6 | -4.138700000 | 4.001000000  | -0.765600000 |
| 1 | -3.545600000 | 3.134200000  | -1.091000000 |
| 8 | -4.051000000 | 5.027600000  | -1.723400000 |
| 1 | -4.682800000 | 4.836000000  | -2.435300000 |
| 6 | -3.556800000 | 4.522500000  | 0.552600000  |
| 1 | -4.090400000 | 5.436300000  | 0.843300000  |
| 6 | -3.713200000 | 3.469100000  | 1.662200000  |
| 1 | -3.042900000 | 2.628900000  | 1.442100000  |
| 8 | -5.057100000 | 3.002200000  | 1.755000000  |
| 6 | -3.375100000 | 4.065400000  | 3.037100000  |
| 1 | -2.365600000 | 4.479700000  | 3.011300000  |
| 1 | -3.424600000 | 3.270100000  | 3.789500000  |
| 8 | -4.231400000 | 5.124500000  | 3.372700000  |
| 1 | -5.133200000 | 4.777200000  | 3.439400000  |
| 1 | 2.232700000  | 0.268100000  | -0.603600000 |
| 1 | 1.332300000  | -3.010300000 | -4.236000000 |
| 6 | -0.807500000 | 1.892000000  | -0.635900000 |
| 1 | -1.198400000 | 2.791200000  | -0.149900000 |
| 1 | -1.590300000 | 0.553200000  | 0.864800000  |
| 1 | -2.687800000 | 0.840500000  | -0.486900000 |
| 1 | -1.907500000 | 2.241000000  | -2.461700000 |
| 1 | -0.282800000 | 2.933300000  | -2.452700000 |
| 1 | 1.241700000  | 2.543000000  | -0.476600000 |
| 1 | 0.697900000  | 1.539600000  | 0.870100000  |

---

**4,9-DA(OH)<sub>2</sub>-β-CD**

|   |              |              |              |
|---|--------------|--------------|--------------|
| 6 | 0.739100000  | -1.383800000 | -0.803000000 |
| 1 | 1.349000000  | -2.289200000 | -0.694300000 |
| 6 | 0.094800000  | -1.046200000 | 0.541000000  |
| 6 | -0.344500000 | -1.623300000 | -1.858900000 |
| 1 | -0.974500000 | -2.462300000 | -1.539900000 |
| 6 | 0.287500000  | -1.961500000 | -3.205900000 |
| 1 | -0.481100000 | -2.138600000 | -3.960300000 |
| 1 | 0.895100000  | -2.865500000 | -3.134000000 |
| 6 | 1.179400000  | -0.806900000 | -3.666300000 |
| 8 | 1.735700000  | -1.187400000 | -4.917200000 |
| 6 | 0.336900000  | 0.467100000  | -3.795500000 |
| 1 | 0.971100000  | 1.295900000  | -4.119500000 |
| 1 | -0.433100000 | 0.312700000  | -4.554500000 |
| 6 | 2.270800000  | -0.576100000 | -2.617100000 |
| 1 | 2.873200000  | -1.483100000 | -2.531700000 |
| 1 | 2.929900000  | 0.233800000  | -2.938100000 |
| 6 | 1.635300000  | -0.234200000 | -1.270300000 |
| 1 | 2.432200000  | -0.068000000 | -0.535300000 |
| 6 | 0.781500000  | 1.031000000  | -1.389800000 |
| 6 | 0.140300000  | 1.369300000  | -0.045500000 |
| 1 | 1.417700000  | 1.870800000  | -1.693500000 |
| 6 | -0.301300000 | 0.797300000  | -2.447700000 |
| 1 | -0.907100000 | 1.705200000  | -2.549100000 |
| 6 | -1.197200000 | -0.357200000 | -1.988100000 |
| 6 | -1.846200000 | -0.016500000 | -0.649600000 |
| 6 | -2.449800000 | -5.500900000 | 0.328800000  |
| 1 | -2.301300000 | -6.538600000 | 0.656900000  |
| 8 | -1.241700000 | -4.935800000 | -0.088200000 |
| 6 | -3.436400000 | -5.487100000 | -0.854600000 |
| 1 | -4.319700000 | -6.075700000 | -0.564500000 |
| 8 | -2.787500000 | -6.074900000 | -1.949200000 |
| 1 | -3.373500000 | -6.003500000 | -2.719500000 |
| 6 | -3.908100000 | -4.060000000 | -1.159800000 |
| 1 | -3.066500000 | -3.480900000 | -1.569100000 |
| 8 | -4.943500000 | -4.156500000 | -2.105300000 |
| 1 | -5.358200000 | -3.283100000 | -2.225100000 |
| 6 | -4.376300000 | -3.377700000 | 0.136700000  |
| 1 | -5.254100000 | -3.909500000 | 0.525900000  |
| 6 | -3.246300000 | -3.457200000 | 1.175200000  |



|   |              |              |              |
|---|--------------|--------------|--------------|
| 1 | -2.348500000 | -3.001900000 | 0.736500000  |
| 8 | -2.979200000 | -4.832000000 | 1.441100000  |
| 6 | -3.553500000 | -2.749300000 | 2.505800000  |
| 1 | -3.676900000 | -3.518000000 | 3.275200000  |
| 1 | -4.481400000 | -2.181800000 | 2.419500000  |
| 8 | -2.554700000 | -1.827200000 | 2.861800000  |
| 1 | -1.750300000 | -2.322500000 | 3.121100000  |
| 6 | 2.822100000  | -5.347300000 | 0.631900000  |
| 1 | 3.734500000  | -5.843900000 | 0.989000000  |
| 8 | 3.096500000  | -4.042900000 | 0.212800000  |
| 6 | 2.253100000  | -6.132100000 | -0.562100000 |
| 1 | 2.151500000  | -7.185300000 | -0.260900000 |
| 8 | 3.160600000  | -6.004300000 | -1.622500000 |
| 1 | 2.778900000  | -6.441300000 | -2.400100000 |
| 6 | 0.860000000  | -5.605500000 | -0.921900000 |
| 1 | 0.953400000  | -4.585200000 | -1.322500000 |
| 8 | 0.320900000  | -6.466900000 | -1.893200000 |
| 1 | -0.624400000 | -6.269200000 | -2.010200000 |
| 6 | -0.031200000 | -5.548300000 | 0.330600000  |
| 1 | -0.221900000 | -6.572700000 | 0.678100000  |
| 6 | 0.678200000  | -4.760500000 | 1.447100000  |
| 1 | 0.849400000  | -3.737700000 | 1.088900000  |
| 8 | 1.938900000  | -5.375400000 | 1.718900000  |
| 6 | -0.091000000 | -4.703700000 | 2.779800000  |
| 1 | 0.453300000  | -5.323400000 | 3.501500000  |
| 1 | -1.097900000 | -5.105100000 | 2.654600000  |
| 8 | -0.261600000 | -3.396000000 | 3.262400000  |
| 1 | 0.605100000  | -2.982700000 | 3.439000000  |
| 6 | 5.756400000  | -0.950900000 | 0.913400000  |
| 1 | 6.640200000  | -0.454400000 | 1.332600000  |
| 8 | 4.921600000  | -0.021000000 | 0.270100000  |
| 6 | 6.202300000  | -2.017800000 | -0.103800000 |
| 1 | 6.926400000  | -2.684200000 | 0.386300000  |
| 8 | 6.795300000  | -1.355800000 | -1.190400000 |
| 1 | 7.009300000  | -2.022400000 | -1.863000000 |
| 6 | 4.991700000  | -2.845600000 | -0.538800000 |
| 1 | 4.289200000  | -2.189700000 | -1.073100000 |
| 8 | 5.452800000  | -3.872100000 | -1.382200000 |
| 1 | 4.725800000  | -4.491800000 | -1.565100000 |
| 6 | 4.274400000  | -3.411000000 | 0.694600000  |
| 1 | 4.930800000  | -4.144100000 | 1.182000000  |
| 6 | 3.939800000  | -2.283800000 | 1.688600000  |
| 1 | 3.197300000  | -1.625800000 | 1.217900000  |
| 8 | 5.110600000  | -1.532400000 | 2.006900000  |
| 6 | 3.385700000  | -2.827200000 | 3.018100000  |
| 1 | 4.205800000  | -2.833000000 | 3.742400000  |
| 1 | 3.029500000  | -3.848500000 | 2.875300000  |
| 8 | 2.280900000  | -2.100800000 | 3.495200000  |
| 1 | 2.568400000  | -1.253300000 | 3.860700000  |
| 6 | 4.606400000  | 4.071000000  | -0.122200000 |
| 1 | 4.907600000  | 5.127600000  | -0.116900000 |
| 8 | 3.229300000  | 3.940200000  | -0.309400000 |
| 6 | 5.305200000  | 3.340700000  | -1.280800000 |
| 1 | 6.391400000  | 3.479500000  | -1.178700000 |
| 8 | 4.846400000  | 3.903100000  | -2.481100000 |
| 1 | 5.210500000  | 3.379200000  | -3.212500000 |
| 6 | 4.987500000  | 1.843800000  | -1.186300000 |
| 1 | 3.904100000  | 1.711600000  | -1.320600000 |
| 8 | 5.682400000  | 1.174900000  | -2.210700000 |
| 1 | 5.974500000  | 0.301300000  | -1.891200000 |
| 6 | 5.362300000  | 1.327000000  | 0.205400000  |
| 1 | 6.453000000  | 1.375000000  | 0.324700000  |
| 6 | 4.702000000  | 2.185300000  | 1.298600000  |
| 1 | 3.613700000  | 2.058300000  | 1.250300000  |
| 8 | 5.027900000  | 3.561800000  | 1.111200000  |
| 6 | 5.193300000  | 1.805900000  | 2.700300000  |
| 1 | 4.990500000  | 0.748800000  | 2.877000000  |
| 1 | 4.643200000  | 2.409400000  | 3.430200000  |
| 8 | 6.582200000  | 1.972800000  | 2.837900000  |
| 1 | 6.784200000  | 2.914200000  | 2.737100000  |
| 6 | -0.283200000 | 6.045400000  | 0.201300000  |
| 1 | -0.928700000 | 6.898800000  | 0.447900000  |
| 8 | -1.045300000 | 4.894400000  | -0.033700000 |
| 6 | 0.521800000  | 6.370500000  | -1.069700000 |
| 1 | 1.062400000  | 7.313500000  | -0.899300000 |

|   |              |              |              |
|---|--------------|--------------|--------------|
| 8 | -0.375500000 | 6.505600000  | -2.138500000 |
| 1 | 0.142800000  | 6.572700000  | -2.956900000 |
| 6 | 1.546200000  | 5.262000000  | -1.314700000 |
| 1 | 1.011500000  | 4.322800000  | -1.520800000 |
| 8 | 2.331100000  | 5.638000000  | -2.419700000 |
| 1 | 3.091400000  | 5.034300000  | -2.497500000 |
| 6 | 2.398500000  | 5.060600000  | -0.052200000 |
| 1 | 3.005400000  | 5.960500000  | 0.115500000  |
| 6 | 1.491100000  | 4.818600000  | 1.165700000  |
| 1 | 0.930000000  | 3.892600000  | 0.993600000  |
| 8 | 0.567100000  | 5.898500000  | 1.302700000  |
| 6 | 2.254700000  | 4.691300000  | 2.496200000  |
| 1 | 1.901100000  | 5.495800000  | 3.153200000  |
| 1 | 3.328300000  | 4.809200000  | 2.334700000  |
| 8 | 2.095400000  | 3.436600000  | 3.101200000  |
| 1 | 1.141900000  | 3.274300000  | 3.225800000  |
| 6 | -4.916700000 | 3.538500000  | 0.631400000  |
| 1 | -5.933000000 | 3.575400000  | 1.043300000  |
| 8 | -4.666200000 | 2.299500000  | 0.029800000  |
| 6 | -4.751900000 | 4.629700000  | -0.440800000 |
| 1 | -5.052600000 | 5.593500000  | -0.005300000 |
| 8 | -5.577900000 | 4.294500000  | -1.524400000 |
| 1 | -5.421400000 | 4.946000000  | -2.227000000 |
| 6 | -3.281600000 | 4.730000000  | -0.858200000 |
| 1 | -2.988800000 | 3.798600000  | -1.365800000 |
| 8 | -3.175600000 | 5.825200000  | -1.732300000 |
| 1 | -2.237400000 | 5.992700000  | -1.941300000 |
| 6 | -2.399500000 | 4.895500000  | 0.391400000  |
| 1 | -2.648300000 | 5.850200000  | 0.873500000  |
| 6 | -2.683600000 | 3.755500000  | 1.384400000  |
| 1 | -2.446600000 | 2.795400000  | 0.906900000  |
| 8 | -4.069500000 | 3.770100000  | 1.723000000  |
| 6 | -1.890800000 | 3.856900000  | 2.699100000  |
| 1 | -2.568500000 | 3.547300000  | 3.505100000  |
| 1 | -1.577500000 | 4.888500000  | 2.877900000  |
| 8 | -0.720800000 | 3.086700000  | 2.705900000  |
| 1 | -0.940300000 | 2.162200000  | 2.464400000  |
| 6 | -5.996400000 | -1.588000000 | 0.131200000  |
| 1 | -6.676300000 | -2.435600000 | 0.292800000  |
| 8 | -4.709500000 | -2.037000000 | -0.183600000 |
| 6 | -6.515600000 | -0.738400000 | -1.039100000 |
| 1 | -7.557600000 | -0.456900000 | -0.827300000 |
| 8 | -6.442200000 | -1.521300000 | -2.200400000 |
| 1 | -6.657300000 | -0.953100000 | -2.957200000 |
| 6 | -5.682300000 | 0.540100000  | -1.151100000 |
| 1 | -4.657600000 | 0.268000000  | -1.443200000 |
| 8 | -6.273900000 | 1.353000000  | -2.135500000 |
| 1 | -5.958200000 | 2.267300000  | -2.028700000 |
| 6 | -5.618900000 | 1.260600000  | 0.202000000  |
| 1 | -6.606700000 | 1.684300000  | 0.429200000  |
| 6 | -5.209300000 | 0.306000000  | 1.334200000  |
| 1 | -4.157000000 | 0.031400000  | 1.199300000  |
| 8 | -6.025500000 | -0.867400000 | 1.329400000  |
| 6 | -5.394600000 | 0.946500000  | 2.716100000  |
| 1 | -4.798200000 | 1.857900000  | 2.773900000  |
| 1 | -5.046200000 | 0.239600000  | 3.477300000  |
| 8 | -6.728600000 | 1.321300000  | 2.949500000  |
| 1 | -7.272000000 | 0.519600000  | 2.953500000  |
| 1 | -1.981800000 | -0.525300000 | -2.734600000 |
| 1 | 2.343400000  | -0.498200000 | -5.218000000 |
| 6 | -0.760100000 | 0.215700000  | 0.406400000  |
| 1 | -0.449100000 | 2.284700000  | -0.133900000 |
| 1 | 0.912600000  | 1.536800000  | 0.708600000  |
| 1 | 0.859900000  | -0.882100000 | 1.302700000  |
| 1 | -0.534700000 | -1.874500000 | 0.873100000  |
| 1 | -2.505300000 | -0.829300000 | -0.333100000 |
| 1 | -2.454100000 | 0.888500000  | -0.738900000 |
| 8 | -1.349700000 | 0.576700000  | 1.653000000  |
| 1 | -1.760400000 | -0.208600000 | 2.059000000  |

---

**1-AdOH· $\gamma$ -CD**

|   |              |              |              |
|---|--------------|--------------|--------------|
| 6 | -6.100500000 | -1.413700000 | -0.825300000 |
| 6 | -6.594900000 | -2.352400000 | 0.287700000  |
| 6 | -5.397400000 | -2.847200000 | 1.116900000  |
| 6 | -4.333700000 | -3.463200000 | 0.193800000  |

---

---

|   |              |              |              |
|---|--------------|--------------|--------------|
| 6 | -3.989200000 | -2.459100000 | -0.918300000 |
| 6 | -3.020200000 | -3.027600000 | -1.962400000 |
| 8 | -7.552000000 | -1.737500000 | 1.105900000  |
| 8 | -5.832600000 | -3.800100000 | 2.057300000  |
| 8 | -3.132700000 | -3.743900000 | 0.903900000  |
| 8 | -5.154300000 | -2.057500000 | -1.629800000 |
| 8 | -3.468000000 | -4.227500000 | -2.529400000 |
| 6 | -5.782200000 | 3.833300000  | -0.690200000 |
| 6 | -6.647000000 | 3.225800000  | 0.430500000  |
| 6 | -6.121600000 | 1.815400000  | 0.737800000  |
| 6 | -6.117100000 | 0.988800000  | -0.550500000 |
| 6 | -5.316700000 | 1.708300000  | -1.648300000 |
| 6 | -5.448600000 | 0.998500000  | -3.003300000 |
| 8 | -6.670500000 | 4.027600000  | 1.577400000  |
| 8 | -6.927900000 | 1.151500000  | 1.680100000  |
| 8 | -5.547200000 | -0.267400000 | -0.227500000 |
| 8 | -5.806800000 | 3.033400000  | -1.838500000 |
| 8 | -6.786400000 | 0.882800000  | -3.411200000 |
| 6 | -1.421400000 | 6.783600000  | -0.247800000 |
| 6 | -2.461500000 | 6.928300000  | 0.879700000  |
| 6 | -3.209400000 | 5.594600000  | 1.012300000  |
| 6 | -3.848600000 | 5.249700000  | -0.335700000 |
| 6 | -2.779000000 | 5.223200000  | -1.440000000 |
| 6 | -3.417300000 | 5.103400000  | -2.832000000 |
| 8 | -1.886800000 | 7.320400000  | 2.093400000  |
| 8 | -4.225400000 | 5.659000000  | 1.983300000  |
| 8 | -4.477300000 | 3.986300000  | -0.194500000 |
| 8 | -2.031900000 | 6.437300000  | -1.457600000 |
| 8 | -4.255500000 | 6.191700000  | -3.117300000 |
| 6 | 3.654900000  | 5.450100000  | 0.283300000  |
| 6 | 2.973300000  | 6.033600000  | 1.537800000  |
| 6 | 1.483300000  | 5.669800000  | 1.491100000  |
| 6 | 0.887500000  | 6.201800000  | 0.184800000  |
| 6 | 1.667600000  | 5.638300000  | -1.014800000 |
| 6 | 1.215000000  | 6.291400000  | -2.328900000 |
| 8 | 3.572900000  | 5.593500000  | 2.723500000  |
| 8 | 0.775700000  | 6.229800000  | 2.570400000  |
| 8 | -0.476100000 | 5.817900000  | 0.140800000  |
| 8 | 3.058600000  | 5.922400000  | -0.888600000 |
| 8 | 1.410500000  | 7.680800000  | -2.316300000 |
| 6 | 6.329200000  | 0.925800000  | 0.134500000  |
| 6 | 5.924900000  | 1.400900000  | 1.541600000  |
| 6 | 4.621400000  | 2.199500000  | 1.446500000  |
| 6 | 4.813700000  | 3.341500000  | 0.444900000  |
| 6 | 5.258900000  | 2.770800000  | -0.911900000 |
| 6 | 5.588600000  | 3.881100000  | -1.918600000 |
| 8 | 5.729500000  | 0.335600000  | 2.431900000  |
| 8 | 4.252900000  | 2.751800000  | 2.686500000  |
| 8 | 3.588000000  | 4.043100000  | 0.346300000  |
| 8 | 6.448600000  | 2.005400000  | -0.749800000 |
| 8 | 6.588600000  | 4.743600000  | -1.441600000 |
| 6 | 5.551000000  | -3.990100000 | -1.443700000 |
| 6 | 6.643500000  | -3.555900000 | -0.446400000 |
| 6 | 6.193600000  | -2.242000000 | 0.203900000  |
| 6 | 5.943500000  | -1.196600000 | -0.890900000 |
| 6 | 4.941100000  | -1.747600000 | -1.916800000 |
| 6 | 4.817100000  | -0.812200000 | -3.127600000 |
| 8 | 6.917700000  | -4.530900000 | 0.519700000  |
| 8 | 7.165800000  | -1.769600000 | 1.113600000  |
| 8 | 5.392300000  | -0.015000000 | -0.327900000 |
| 8 | 5.362800000  | -3.010400000 | -2.424700000 |
| 8 | 6.031800000  | -0.659500000 | -3.809800000 |
| 6 | 1.432200000  | -7.007300000 | -0.168200000 |
| 6 | 2.565100000  | -7.030300000 | 0.885000000  |
| 6 | 3.348900000  | -5.719700000 | 0.765000000  |
| 6 | 3.833000000  | -5.520800000 | -0.673700000 |
| 6 | 2.684300000  | -5.699600000 | -1.681600000 |
| 6 | 3.211600000  | -5.756200000 | -3.122100000 |
| 8 | 2.112000000  | -7.235700000 | 2.193300000  |
| 8 | 4.478100000  | -5.704000000 | 1.606800000  |
| 8 | 4.354600000  | -4.203800000 | -0.736600000 |

---

---

|   |              |              |              |
|---|--------------|--------------|--------------|
| 8 | 1.981300000  | -6.920000000 | -1.448800000 |
| 8 | 4.175500000  | -6.761800000 | -3.298400000 |
| 6 | -3.136100000 | -4.977800000 | 1.580900000  |
| 6 | -1.972800000 | -4.981000000 | 2.589000000  |
| 6 | -0.647700000 | -4.936800000 | 1.821700000  |
| 6 | -0.582300000 | -6.093100000 | 0.820200000  |
| 6 | -1.835400000 | -6.086100000 | -0.073400000 |
| 6 | -1.897900000 | -7.330800000 | -0.966500000 |
| 8 | -2.044500000 | -3.950800000 | 3.528000000  |
| 8 | 0.446700000  | -5.023000000 | 2.706300000  |
| 8 | 0.575000000  | -5.903500000 | 0.021100000  |
| 8 | -3.027600000 | -6.069700000 | 0.705700000  |
| 8 | -1.839300000 | -8.525600000 | -0.230800000 |
| 1 | -6.926600000 | -1.150700000 | -1.497100000 |
| 1 | -7.088300000 | -3.217900000 | -0.168200000 |
| 1 | -4.943600000 | -1.987600000 | 1.635500000  |
| 1 | -4.720200000 | -4.391300000 | -0.245700000 |
| 1 | -3.533800000 | -1.578100000 | -0.448500000 |
| 1 | -2.868600000 | -2.262600000 | -2.733600000 |
| 1 | -2.064100000 | -3.241100000 | -1.481500000 |
| 1 | -7.252600000 | -0.842400000 | 1.356200000  |
| 1 | -7.162800000 | 1.783800000  | 2.378200000  |
| 1 | -6.197900000 | 4.797800000  | -1.008400000 |
| 1 | -7.683300000 | 3.149900000  | 0.081900000  |
| 1 | -5.089900000 | 1.889900000  | 1.112500000  |
| 1 | -7.152700000 | 0.857000000  | -0.889000000 |
| 1 | -4.261200000 | 1.742200000  | -1.350500000 |
| 1 | -4.860300000 | 1.550700000  | -3.744800000 |
| 1 | -5.059400000 | -0.017700000 | -2.917600000 |
| 1 | -5.790200000 | 4.418600000  | 1.737200000  |
| 1 | -7.137800000 | 1.772800000  | -3.561600000 |
| 1 | -0.937900000 | 7.749200000  | -0.443200000 |
| 1 | -3.175600000 | 7.714300000  | 0.608900000  |
| 1 | -2.488300000 | 4.806300000  | 1.274500000  |
| 1 | -4.595800000 | 6.015400000  | -0.581000000 |
| 1 | -2.109000000 | 4.373000000  | -1.258300000 |
| 1 | -2.619800000 | 5.019200000  | -3.579100000 |
| 1 | -4.045000000 | 4.211600000  | -2.867200000 |
| 1 | -3.893800000 | 6.177100000  | 2.734700000  |
| 1 | -3.716000000 | 6.996200000  | -3.126900000 |
| 1 | 4.696500000  | 5.789800000  | 0.227400000  |
| 1 | 3.080200000  | 7.124000000  | 1.527900000  |
| 1 | 1.385400000  | 4.574600000  | 1.507500000  |
| 1 | 0.970100000  | 7.296200000  | 0.177900000  |
| 1 | 1.512600000  | 4.552600000  | -1.060900000 |
| 1 | 1.760400000  | 5.827800000  | -3.158500000 |
| 1 | 0.143800000  | 6.130000000  | -2.462400000 |
| 1 | 3.700600000  | 4.624700000  | 2.699000000  |
| 1 | 1.332200000  | 6.167500000  | 3.363800000  |
| 1 | 2.360600000  | 7.853200000  | -2.239800000 |
| 1 | 7.332300000  | 0.484500000  | 0.173800000  |
| 1 | 6.721800000  | 2.066100000  | 1.914100000  |
| 1 | 3.829000000  | 1.529600000  | 1.082700000  |
| 1 | 5.599100000  | 4.009000000  | 0.822100000  |
| 1 | 4.455300000  | 2.136600000  | -1.308100000 |
| 1 | 4.700600000  | 4.494000000  | -2.083400000 |
| 1 | 5.891200000  | 3.413700000  | -2.862200000 |
| 1 | 6.319300000  | -0.402200000 | 2.189200000  |
| 1 | 4.424100000  | 2.090700000  | 3.375200000  |
| 1 | 7.409200000  | 4.236800000  | -1.353200000 |
| 1 | 5.862200000  | -4.892800000 | -1.983400000 |
| 1 | 7.579800000  | -3.393200000 | -0.991500000 |
| 1 | 5.246600000  | -2.418200000 | 0.736500000  |
| 1 | 6.885600000  | -0.962300000 | -1.403500000 |
| 1 | 3.965100000  | -1.850600000 | -1.427100000 |
| 1 | 4.528700000  | 0.179400000  | -2.776300000 |
| 1 | 4.041100000  | -1.204300000 | -3.794600000 |
| 1 | 6.085800000  | -4.859200000 | 0.915100000  |
| 1 | 7.569900000  | -2.547400000 | 1.535800000  |
| 1 | 0.871700000  | -7.950900000 | -0.139800000 |
| 1 | 3.221600000  | -7.876900000 | 0.655000000  |

---

|   |              |              |              |
|---|--------------|--------------|--------------|
| 1 | 2.677600000  | -4.886200000 | 1.024300000  |
| 1 | 4.619600000  | -6.255300000 | -0.887800000 |
| 1 | 1.994000000  | -4.854200000 | -1.577400000 |
| 1 | 3.700700000  | -4.809400000 | -3.359800000 |
| 1 | 2.361700000  | -5.905500000 | -3.796200000 |
| 1 | 1.536500000  | -6.488200000 | 2.458500000  |
| 1 | 4.231300000  | -6.098700000 | 2.458900000  |
| 1 | 3.747200000  | -7.620600000 | -3.169900000 |
| 1 | -4.087800000 | -5.125300000 | 2.104500000  |
| 1 | -2.031600000 | -5.915500000 | 3.158900000  |
| 1 | -0.595500000 | -3.990000000 | 1.263600000  |
| 1 | -0.527800000 | -7.045500000 | 1.360000000  |
| 1 | -1.797300000 | -5.200600000 | -0.716700000 |
| 1 | -2.813700000 | -7.276400000 | -1.564400000 |
| 1 | -1.034900000 | -7.328700000 | -1.634700000 |
| 1 | -1.971600000 | -3.088300000 | 3.073800000  |
| 1 | 0.214400000  | -4.535100000 | 3.514800000  |
| 1 | -2.635100000 | -8.584000000 | 0.317700000  |
| 1 | -4.292700000 | -4.051000000 | -3.005600000 |
| 1 | 6.303200000  | -1.527300000 | -4.143900000 |
| 1 | -1.052500000 | 6.835500000  | 2.248200000  |
| 1 | -6.650400000 | -3.466900000 | 2.463000000  |
| 6 | -1.414200000 | 0.906800000  | -0.732000000 |
| 1 | -2.258500000 | 0.312900000  | -1.091500000 |
| 1 | -1.161600000 | 1.634500000  | -1.506400000 |
| 6 | -0.214500000 | -0.003300000 | -0.465700000 |
| 1 | 0.057700000  | -0.529100000 | -1.386700000 |
| 6 | -0.570400000 | -1.030100000 | 0.609000000  |
| 1 | 0.288500000  | -1.673800000 | 0.813300000  |
| 1 | -1.397500000 | -1.666800000 | 0.289100000  |
| 6 | -0.968100000 | -0.309200000 | 1.898000000  |
| 8 | -1.300800000 | -1.310100000 | 2.856700000  |
| 6 | 0.216100000  | 0.537500000  | 2.379300000  |
| 1 | -0.048200000 | 1.051700000  | 3.306400000  |
| 1 | 1.064200000  | -0.119000000 | 2.583400000  |
| 6 | -2.169300000 | 0.604500000  | 1.626100000  |
| 1 | -3.018900000 | 0.001100000  | 1.294700000  |
| 1 | -2.458600000 | 1.114000000  | 2.548900000  |
| 6 | -1.798400000 | 1.632500000  | 0.557500000  |
| 1 | -2.657600000 | 2.287400000  | 0.370300000  |
| 6 | -0.617200000 | 2.471900000  | 1.046000000  |
| 1 | -0.363900000 | 3.229700000  | 0.301300000  |
| 1 | -0.888900000 | 2.994700000  | 1.966000000  |
| 6 | 0.583300000  | 1.561500000  | 1.304900000  |
| 1 | 1.432500000  | 2.161200000  | 1.650600000  |
| 6 | 0.968100000  | 0.840300000  | 0.013500000  |
| 1 | 1.240800000  | 1.572700000  | -0.749600000 |
| 1 | 1.837200000  | 0.200300000  | 0.184900000  |
| 1 | -1.479400000 | -0.880100000 | 3.704700000  |

---

**1-DAOH- $\gamma$ -CD**

|   |              |              |              |
|---|--------------|--------------|--------------|
| 6 | -6.784668952 | 0.303032581  | 0.080414039  |
| 6 | -6.985736530 | 1.526063994  | -0.836772216 |
| 6 | -5.734598191 | 2.409996130  | -0.743643189 |
| 6 | -5.492394296 | 2.776551511  | 0.722387807  |
| 6 | -5.375959288 | 1.497557812  | 1.569750876  |
| 6 | -5.284850192 | 1.832442840  | 3.064388088  |
| 8 | -7.249361956 | 1.153155212  | -2.160677794 |
| 8 | -5.884294107 | 3.594237991  | -1.491236615 |
| 8 | -4.301929992 | 3.542687449  | 0.791112031  |
| 8 | -6.540075262 | 0.689491092  | 1.401948576  |
| 8 | -6.394415076 | 2.568288404  | 3.510751243  |
| 6 | -4.912263726 | -4.411252553 | -1.301655703 |
| 6 | -5.355315273 | -3.528634281 | -2.483968848 |
| 6 | -5.167855048 | -2.059544750 | -2.079448330 |
| 6 | -5.960665498 | -1.791600321 | -0.797769961 |
| 6 | -5.531079672 | -2.769542622 | 0.307657142  |
| 6 | -6.431736628 | -2.655118925 | 1.545372577  |
| 8 | -4.663334756 | -3.831956754 | -3.662362634 |
| 8 | -5.629912540 | -1.181369643 | -3.076950995 |
| 8 | -5.713162235 | -0.447142033 | -0.434359723 |
| 8 | -5.644589938 | -4.117834786 | -0.146333920 |

|   |              |              |              |
|---|--------------|--------------|--------------|
| 8 | -7.782725832 | -2.883812002 | 1.238802185  |
| 6 | -0.132631968 | -6.449294078 | -0.374402872 |
| 6 | -0.453682905 | -6.157904012 | -1.850781231 |
| 6 | -1.465546760 | -5.010878895 | -1.939459869 |
| 6 | -2.688749772 | -5.341398574 | -1.078500733 |
| 6 | -2.261942060 | -5.690787908 | 0.355957498  |
| 6 | -3.442666650 | -6.208678207 | 1.188959967  |
| 8 | 0.686196539  | -5.805244795 | -2.587101737 |
| 8 | -1.914389237 | -4.823458550 | -3.260300386 |
| 8 | -3.536384718 | -4.207595797 | -1.106233700 |
| 8 | -1.297682901 | -6.738606660 | 0.346316671  |
| 8 | -3.998001661 | -7.374921398 | 0.639730397  |
| 6 | 4.295835772  | -4.620213796 | 1.700845819  |
| 6 | 4.235260214  | -5.832061699 | 0.745842367  |
| 6 | 2.936950265  | -5.729530850 | -0.060520711 |
| 6 | 1.741013022  | -5.680926201 | 0.899337750  |
| 6 | 1.940684760  | -4.584530381 | 1.955352196  |
| 6 | 0.896398591  | -4.701054884 | 3.073954168  |
| 8 | 5.347914597  | -5.949418839 | -0.093407510 |
| 8 | 2.798756897  | -6.825711937 | -0.941110620 |
| 8 | 0.553959888  | -5.360326556 | 0.187834357  |
| 8 | 3.215930086  | -4.663480006 | 2.583871485  |
| 8 | 0.992160999  | -5.914014133 | 3.768448195  |
| 6 | 6.840546447  | -0.372400738 | -0.125248810 |
| 6 | 6.821246739  | -1.603369294 | -1.050559311 |
| 6 | 5.532624422  | -2.391003286 | -0.770747468 |
| 6 | 5.495391110  | -2.770336438 | 0.712411301  |
| 6 | 5.638117818  | -1.504712502 | 1.578241592  |
| 6 | 5.773454622  | -1.863078908 | 3.064540603  |
| 8 | 6.929123178  | -1.266748490 | -2.404194530 |
| 8 | 5.472168270  | -3.558756766 | -1.555024688 |
| 8 | 4.255554582  | -3.404116761 | 0.984896355  |
| 8 | 6.800495035  | -0.762097139 | 1.218224199  |
| 8 | 6.833163132  | -2.750807958 | 3.306945997  |
| 6 | 4.933232622  | 4.429236855  | -1.247984111 |
| 6 | 5.371242487  | 3.568735606  | -2.448376682 |
| 6 | 5.175618944  | 2.092127488  | -2.076024532 |
| 6 | 5.985047840  | 1.791416250  | -0.811413453 |
| 6 | 5.566445074  | 2.745336113  | 0.319602257  |
| 6 | 6.496845088  | 2.603975817  | 1.533421597  |
| 8 | 4.683141986  | 3.897502932  | -3.621916869 |
| 8 | 5.608270018  | 1.235644547  | -3.104148679 |
| 8 | 5.741775686  | 0.441040135  | -0.455875727 |
| 8 | 5.661624864  | 4.105017930  | -0.098899281 |
| 8 | 7.827797526  | 2.908356237  | 1.210247494  |
| 6 | 0.176427839  | 6.534941782  | -0.362285244 |
| 6 | 0.514646482  | 6.247123496  | -1.835849161 |
| 6 | 1.483981673  | 5.062985498  | -1.888189307 |
| 6 | 2.718367005  | 5.383286446  | -1.040150747 |
| 6 | 2.293788147  | 5.753044507  | 0.390713381  |
| 6 | 3.481513200  | 6.266184793  | 1.216902086  |
| 8 | -0.617213024 | 5.924521201  | -2.597258973 |
| 8 | 1.910297950  | 4.785753694  | -3.198657512 |
| 8 | 3.552915700  | 4.238347792  | -1.058273819 |
| 8 | 1.337956519  | 6.808551766  | 0.371155793  |
| 8 | 4.060785738  | 7.409957165  | 0.645642277  |
| 6 | -4.319312652 | 4.714929046  | 1.570860840  |
| 6 | -4.214543506 | 5.947697746  | 0.651117049  |
| 6 | -2.897234976 | 5.843257205  | -0.126820254 |
| 6 | -1.727753759 | 5.749914660  | 0.862154758  |
| 6 | -1.975835738 | 4.610871052  | 1.862108549  |
| 6 | -0.941094534 | 4.631038104  | 2.995101255  |
| 8 | -5.304336669 | 6.087830073  | -0.214431493 |
| 8 | -2.725625340 | 6.957208613  | -0.978892380 |
| 8 | -0.521772257 | 5.441053947  | 0.178176703  |
| 8 | -3.254647683 | 4.704923728  | 2.477602582  |
| 8 | -1.003110062 | 5.808667946  | 3.751151388  |
| 1 | -7.703900408 | -0.294891302 | 0.120945191  |
| 1 | -7.858112064 | 2.095317823  | -0.497568257 |
| 1 | -4.869571327 | 1.839537277  | -1.112177889 |
| 1 | -6.342258181 | 3.367876220  | 1.085824191  |
| 1 | -4.483737360 | 0.934106438  | 1.258518490  |
| 1 | -5.181734732 | 0.898403736  | 3.627044763  |
| 1 | -4.406665215 | 2.456814402  | 3.238460658  |
| 1 | -6.628552842 | 0.453101517  | -2.440716857 |

|   |              |              |              |
|---|--------------|--------------|--------------|
| 1 | -5.354510784 | -1.532225296 | -3.939432736 |
| 1 | -5.128142692 | -5.466447026 | -1.513194953 |
| 1 | -6.416152406 | -3.709494131 | -2.691931877 |
| 1 | -4.101094662 | -1.876821920 | -1.880508783 |
| 1 | -7.029045194 | -1.935205662 | -1.007625752 |
| 1 | -4.492269070 | -2.551049257 | 0.584074857  |
| 1 | -6.078032889 | -3.365523944 | 2.300890124  |
| 1 | -6.367387304 | -1.641165686 | 1.943522743  |
| 1 | -3.723002266 | -4.010493937 | -3.466647274 |
| 1 | -7.874383632 | -3.799057866 | 0.935504628  |
| 1 | 0.472189129  | -7.362007736 | -0.306916545 |
| 1 | -0.916202403 | -7.064311124 | -2.276956648 |
| 1 | -0.997787886 | -4.088512794 | -1.565767566 |
| 1 | -3.202400130 | -6.207076380 | -1.517528895 |
| 1 | -1.837320133 | -4.791620533 | 0.820892531  |
| 1 | -3.094410761 | -6.387784298 | 2.212688124  |
| 1 | -4.236753719 | -5.460438082 | 1.197735051  |
| 1 | -1.137934620 | -4.785825540 | -3.839523976 |
| 1 | -3.319296216 | -8.065959328 | 0.651041690  |
| 1 | 5.195185711  | -4.674361443 | 2.327958821  |
| 1 | 4.219436023  | -6.742239821 | 1.356193097  |
| 1 | 2.955112386  | -4.793346592 | -0.640160444 |
| 1 | 1.630891238  | -6.652070321 | 1.399921713  |
| 1 | 1.831923811  | -3.616453206 | 1.454228396  |
| 1 | 1.017836977  | -3.850635418 | 3.754598889  |
| 1 | -0.098930651 | -4.671879178 | 2.627614462  |
| 1 | 5.426512259  | -5.146275912 | -0.650434681 |
| 1 | 3.691020560  | -7.075698949 | -1.238142686 |
| 1 | 1.863810841  | -5.954109754 | 4.189212319  |
| 1 | 7.784506804  | 0.175319642  | -0.236558698 |
| 1 | 7.685778102  | -2.236300097 | -0.820206857 |
| 1 | 4.665349050  | -1.751469526 | -0.991943757 |
| 1 | 6.326786423  | -3.450727328 | 0.930907990  |
| 1 | 4.746874022  | -0.883484853 | 1.434815496  |
| 1 | 4.861091882  | -2.367518871 | 3.388738985  |
| 1 | 5.898514279  | -0.937783600 | 3.637047658  |
| 1 | 6.378000737  | -0.485777529 | -2.607062996 |
| 1 | 5.820830035  | -3.346171234 | -2.437205730 |
| 1 | 7.665436667  | -2.296283747 | 3.110882776  |
| 1 | 5.160402935  | 5.486307654  | -1.435736662 |
| 1 | 6.432968424  | 3.748505905  | -2.651728360 |
| 1 | 4.110470372  | 1.914938179  | -1.864140948 |
| 1 | 7.050865533  | 1.938353729  | -1.027329068 |
| 1 | 4.533133897  | 2.514869506  | 0.608214021  |
| 1 | 6.489212631  | 1.566698651  | 1.873383535  |
| 1 | 6.131221053  | 3.254023016  | 2.336153863  |
| 1 | 3.741432156  | 4.069614388  | -3.427821138 |
| 1 | 5.355214521  | 1.630067875  | -3.954868555 |
| 1 | -0.422827626 | 7.450364205  | -0.292105522 |
| 1 | 1.013154027  | 7.138211281  | -2.251463002 |
| 1 | 0.973222917  | 4.186902475  | -1.461690807 |
| 1 | 3.241382129  | 6.237987556  | -1.488425167 |
| 1 | 1.861234286  | 4.863571277  | 0.866959907  |
| 1 | 4.261269444  | 5.503111564  | 1.242219596  |
| 1 | 3.134036775  | 6.470780076  | 2.235737335  |
| 1 | -1.388528108 | 6.413988539  | -2.255222374 |
| 1 | 1.133718478  | 4.802988012  | -3.779831684 |
| 1 | 3.402896833  | 8.120619889  | 0.658083513  |
| 1 | -5.226234316 | 4.769385552  | 2.185357456  |
| 1 | -4.201417162 | 6.848901900  | 1.274476567  |
| 1 | -2.916077066 | 4.920767798  | -0.727581261 |
| 1 | -1.622126685 | 6.698269387  | 1.405031034  |
| 1 | -1.905159861 | 3.665494505  | 1.310996064  |
| 1 | -1.098263214 | 3.750340993  | 3.628730645  |
| 1 | 0.058067215  | 4.591058814  | 2.558377649  |
| 1 | -5.469899779 | 5.246371632  | -0.686698784 |
| 1 | -3.608666943 | 7.221173259  | -1.291291483 |
| 1 | -1.878201115 | 5.858957540  | 4.163496947  |
| 1 | -7.183910444 | 2.016313149  | 3.410346359  |
| 1 | 7.871618403  | 3.839436417  | 0.946725004  |
| 1 | 1.460720268  | -6.279675165 | -2.231994356 |
| 1 | -6.322432385 | 3.369447747  | -2.328377621 |
| 6 | 0.442078966  | -0.709928058 | 1.665114220  |
| 1 | 0.254309367  | -1.280125711 | 2.581700747  |
| 6 | 1.951587354  | -0.612979408 | 1.433345181  |

|   |              |              |              |
|---|--------------|--------------|--------------|
| 6 | -0.143967992 | 0.699119830  | 1.811841705  |
| 1 | 0.332725607  | 1.209310028  | 2.655713397  |
| 6 | -1.668586501 | 0.604716741  | 2.064478409  |
| 1 | -2.085439335 | 1.606197329  | 2.181306984  |
| 1 | -1.850610960 | 0.040869853  | 2.980633009  |
| 6 | -2.234768601 | -0.088931837 | 0.874160943  |
| 6 | -2.079438389 | 0.688286998  | -0.385624868 |
| 1 | -2.565968588 | 0.180871219  | -1.220513309 |
| 1 | -2.488713170 | 1.697012996  | -0.291689478 |
| 6 | -1.770570884 | -1.498206750 | 0.749576956  |
| 1 | -2.238828029 | -2.014237475 | -0.090547405 |
| 1 | -1.952916711 | -2.068472043 | 1.663219955  |
| 6 | -0.242588045 | -1.423758965 | 0.496425220  |
| 1 | 0.148265284  | -2.441456825 | 0.379844841  |
| 6 | 0.030013915  | -0.640650711 | -0.794897666 |
| 6 | 1.547897726  | -0.544795773 | -1.021372953 |
| 8 | -0.574663038 | -1.350469109 | -1.867770174 |
| 6 | -0.555346002 | 0.775630932  | -0.650731207 |
| 1 | -0.378688848 | 1.340100876  | -1.574576366 |
| 6 | 0.128837780  | 1.480615735  | 0.523202609  |
| 6 | 1.637043551  | 1.575583111  | 0.286282441  |
| 1 | -0.277560679 | 2.494678407  | 0.613592135  |
| 6 | 2.216113445  | 0.169690690  | 0.149617386  |
| 1 | 3.294885905  | 0.232519197  | -0.033439279 |
| 1 | 1.742032084  | -0.001560050 | -1.950333845 |
| 1 | 1.948982225  | -1.555957556 | -1.128828731 |
| 1 | 2.389801408  | -1.609813008 | 1.354834634  |
| 1 | 2.418218534  | -0.108109935 | 2.282174320  |
| 1 | 2.106148553  | 2.091788826  | 1.127360218  |
| 1 | 1.843433845  | 2.161085043  | -0.612410546 |
| 1 | -0.372355623 | -0.890375042 | -2.693798881 |

---

#### 4-DAOH- $\gamma$ -CD

---

|   |              |              |              |
|---|--------------|--------------|--------------|
| 6 | 6.130300000  | -1.769000000 | -0.504000000 |
| 6 | 5.725500000  | -2.270800000 | -1.901200000 |
| 6 | 4.372500000  | -2.983500000 | -1.815900000 |
| 6 | 4.433500000  | -4.075300000 | -0.741500000 |
| 6 | 4.873200000  | -3.453900000 | 0.593600000  |
| 6 | 5.048500000  | -4.494000000 | 1.705000000  |
| 8 | 5.615300000  | -1.229200000 | -2.833500000 |
| 8 | 4.025400000  | -3.592100000 | -3.035100000 |
| 8 | 3.145200000  | -4.657200000 | -0.665300000 |
| 8 | 6.135200000  | -2.813300000 | 0.429400000  |
| 8 | 5.113600000  | -3.906600000 | 2.977100000  |
| 6 | 5.705100000  | 3.225800000  | 0.962100000  |
| 6 | 6.748000000  | 2.712300000  | -0.050400000 |
| 6 | 6.199100000  | 1.424900000  | -0.675700000 |
| 6 | 5.900700000  | 0.412800000  | 0.437000000  |
| 6 | 4.965500000  | 1.034300000  | 1.484300000  |
| 6 | 4.826300000  | 0.120900000  | 2.710200000  |
| 8 | 7.070600000  | 3.657700000  | -1.030100000 |
| 8 | 7.122100000  | 0.869100000  | -1.589100000 |
| 8 | 5.265900000  | -0.734600000 | -0.107600000 |
| 8 | 5.479300000  | 2.274500000  | 1.961600000  |
| 8 | 6.056300000  | -0.115500000 | 3.337900000  |
| 6 | 1.982500000  | 6.729900000  | -0.281300000 |
| 6 | 3.102800000  | 6.562000000  | -1.325500000 |
| 6 | 3.621400000  | 5.119000000  | -1.235500000 |
| 6 | 4.101000000  | 4.863700000  | 0.195500000  |
| 6 | 2.974600000  | 5.161200000  | 1.199100000  |
| 6 | 3.481900000  | 5.085400000  | 2.645900000  |
| 8 | 2.684400000  | 6.882700000  | -2.620800000 |
| 8 | 4.704800000  | 4.906600000  | -2.110800000 |
| 8 | 4.506700000  | 3.509400000  | 0.280000000  |
| 8 | 2.462000000  | 6.478100000  | 1.011000000  |
| 8 | 4.552900000  | 5.962200000  | 2.879000000  |
| 6 | -3.181100000 | 5.857800000  | -1.038500000 |
| 6 | -2.370500000 | 6.289200000  | -2.275400000 |
| 6 | -0.913400000 | 5.837700000  | -2.106500000 |
| 6 | -0.363700000 | 6.382100000  | -0.784700000 |
| 6 | -1.273700000 | 5.970000000  | 0.383700000  |
| 6 | -0.854500000 | 6.671500000  | 1.684000000  |
| 8 | -2.925700000 | 5.801500000  | -3.464700000 |
| 8 | -0.109200000 | 6.326600000  | -3.153200000 |
| 8 | 0.938800000  | 5.853200000  | -0.614300000 |



|   |              |              |              |
|---|--------------|--------------|--------------|
| 8 | -2.622800000 | 6.357900000  | 0.141600000  |
| 8 | -0.950300000 | 8.066900000  | 1.578700000  |
| 6 | -6.207200000 | 1.590900000  | -0.533200000 |
| 6 | -5.804200000 | 1.919200000  | -1.980100000 |
| 6 | -4.450300000 | 2.635500000  | -1.969200000 |
| 6 | -4.534200000 | 3.861000000  | -1.054500000 |
| 6 | -5.012600000 | 3.443600000  | 0.345800000  |
| 6 | -5.266000000 | 4.654900000  | 1.253300000  |
| 8 | -5.696300000 | 0.770500000  | -2.778000000 |
| 8 | -4.076300000 | 3.070500000  | -3.253200000 |
| 8 | -3.246800000 | 4.451500000  | -1.015800000 |
| 8 | -6.250800000 | 2.747600000  | 0.254600000  |
| 8 | -6.216400000 | 5.531400000  | 0.706000000  |
| 6 | -5.732800000 | -3.135000000 | 1.632500000  |
| 6 | -6.800900000 | -2.751400000 | 0.590600000  |
| 6 | -6.255500000 | -1.578300000 | -0.234500000 |
| 6 | -5.917300000 | -0.420500000 | 0.713300000  |
| 6 | -4.931400000 | -0.905200000 | 1.785500000  |
| 6 | -4.698300000 | 0.167700000  | 2.858500000  |
| 8 | -7.166700000 | -3.824700000 | -0.229100000 |
| 8 | -7.194500000 | -1.154300000 | -1.199700000 |
| 8 | -5.312700000 | 0.643300000  | -0.006500000 |
| 8 | -5.436300000 | -2.049400000 | 2.465300000  |
| 8 | -5.880600000 | 0.533400000  | 3.513800000  |
| 6 | -1.913600000 | -6.703700000 | 0.990200000  |
| 6 | -3.117500000 | -6.864800000 | 0.039400000  |
| 6 | -3.746300000 | -5.481400000 | -0.169600000 |
| 6 | -4.117100000 | -4.883900000 | 1.190100000  |
| 6 | -2.899200000 | -4.872200000 | 2.128400000  |
| 6 | -3.299700000 | -4.472400000 | 3.555200000  |
| 8 | -2.764100000 | -7.459800000 | -1.177000000 |
| 8 | -4.913600000 | -5.550300000 | -0.953100000 |
| 8 | -4.585000000 | -3.567800000 | 0.947800000  |
| 8 | -2.311900000 | -6.168700000 | 2.218000000  |
| 8 | -4.265700000 | -5.336300000 | 4.094000000  |
| 6 | 3.046800000  | -6.058000000 | -0.642000000 |
| 6 | 2.046900000  | -6.482000000 | -1.734000000 |
| 6 | 0.665900000  | -5.923800000 | -1.361400000 |
| 6 | 0.288900000  | -6.438200000 | 0.031000000  |
| 6 | 1.376700000  | -6.052200000 | 1.047400000  |
| 6 | 1.112500000  | -6.682800000 | 2.421500000  |
| 8 | 2.444100000  | -6.070400000 | -3.010600000 |
| 8 | -0.321800000 | -6.329700000 | -2.275700000 |
| 8 | -0.959900000 | -5.868500000 | 0.375000000  |
| 8 | 2.652100000  | -6.524700000 | 0.616700000  |
| 8 | 1.031800000  | -8.082400000 | 2.354100000  |
| 1 | 7.167700000  | -1.414500000 | -0.534700000 |
| 1 | 6.487200000  | -2.997500000 | -2.229700000 |
| 1 | 3.609800000  | -2.244700000 | -1.531100000 |
| 1 | 5.171000000  | -4.828200000 | -1.049300000 |
| 1 | 4.121600000  | -2.714500000 | 0.900900000  |
| 1 | 4.184400000  | -5.160000000 | 1.721600000  |
| 1 | 5.954100000  | -5.075700000 | 1.493500000  |
| 1 | 6.227900000  | -0.508900000 | -2.593200000 |
| 1 | 7.561000000  | 1.607900000  | -2.044900000 |
| 1 | 6.084100000  | 4.112800000  | 1.484400000  |
| 1 | 7.680700000  | 2.492400000  | 0.481000000  |
| 1 | 5.258600000  | 1.659500000  | -1.197500000 |
| 1 | 6.837900000  | 0.122600000  | 0.929700000  |
| 1 | 3.982700000  | 1.193800000  | 1.026800000  |
| 1 | 4.112700000  | 0.576400000  | 3.406100000  |
| 1 | 4.446800000  | -0.850000000 | 2.388300000  |
| 1 | 6.255000000  | 4.025700000  | -1.426600000 |
| 1 | 6.396000000  | 0.728300000  | 3.669900000  |
| 1 | 1.634800000  | 7.770700000  | -0.258000000 |
| 1 | 3.920900000  | 7.251900000  | -1.086900000 |
| 1 | 2.802000000  | 4.424800000  | -1.474600000 |
| 1 | 4.950900000  | 5.526000000  | 0.405000000  |
| 1 | 2.174300000  | 4.426200000  | 1.049800000  |
| 1 | 2.646700000  | 5.300800000  | 3.321600000  |
| 1 | 3.854000000  | 4.077700000  | 2.840700000  |
| 1 | 4.489000000  | 5.323100000  | -2.960900000 |
| 1 | 4.231500000  | 6.869900000  | 2.775900000  |
| 1 | -4.187500000 | 6.293500000  | -1.079300000 |
| 1 | -2.393900000 | 7.382400000  | -2.351500000 |

|   |              |              |              |
|---|--------------|--------------|--------------|
| 1 | -0.863900000 | 4.738900000  | -2.079000000 |
| 1 | -0.325300000 | 7.477800000  | -0.838400000 |
| 1 | -1.213300000 | 4.880700000  | 0.506800000  |
| 1 | -1.478800000 | 6.298400000  | 2.504000000  |
| 1 | 0.193200000  | 6.447200000  | 1.892400000  |
| 1 | -3.163900000 | 4.859800000  | -3.364100000 |
| 1 | -0.605100000 | 6.239600000  | -3.983300000 |
| 1 | -1.877300000 | 8.296300000  | 1.415100000  |
| 1 | -7.233100000 | 1.203600000  | -0.519600000 |
| 1 | -6.564300000 | 2.600300000  | -2.397000000 |
| 1 | -3.697200000 | 1.941300000  | -1.571200000 |
| 1 | -5.258100000 | 4.567200000  | -1.481600000 |
| 1 | -4.249400000 | 2.795500000  | 0.796600000  |
| 1 | -4.342200000 | 5.225100000  | 1.363300000  |
| 1 | -5.589400000 | 4.288200000  | 2.234000000  |
| 1 | -6.296600000 | 0.081300000  | -2.439700000 |
| 1 | -4.282600000 | 2.363300000  | -3.883800000 |
| 1 | -7.065000000 | 5.066800000  | 0.659400000  |
| 1 | -6.113700000 | -3.915600000 | 2.302400000  |
| 1 | -7.712400000 | -2.436100000 | 1.110800000  |
| 1 | -5.329900000 | -1.897700000 | -0.737200000 |
| 1 | -6.830600000 | -0.064300000 | 1.207000000  |
| 1 | -3.981100000 | -1.152700000 | 1.295200000  |
| 1 | -4.314600000 | 1.068500000  | 2.377000000  |
| 1 | -3.956200000 | -0.207700000 | 3.573100000  |
| 1 | -6.373200000 | -4.314700000 | -0.522400000 |
| 1 | -7.654700000 | -1.947400000 | -1.524600000 |
| 1 | -1.484100000 | -7.684700000 | 1.228000000  |
| 1 | -3.852100000 | -7.531700000 | 0.503800000  |
| 1 | -3.007200000 | -4.824000000 | -0.652300000 |
| 1 | -4.912400000 | -5.491900000 | 1.639600000  |
| 1 | -2.163400000 | -4.161100000 | 1.735500000  |
| 1 | -3.746800000 | -3.476700000 | 3.536400000  |
| 1 | -2.399600000 | -4.454000000 | 4.179800000  |
| 1 | -1.985600000 | -7.008300000 | -1.559100000 |
| 1 | -4.756200000 | -6.174200000 | -1.680200000 |
| 1 | -3.873400000 | -6.218000000 | 4.175900000  |
| 1 | 4.023000000  | -6.524000000 | -0.827400000 |
| 1 | 1.991100000  | -7.576400000 | -1.763600000 |
| 1 | 0.720900000  | -4.824800000 | -1.332000000 |
| 1 | 0.208700000  | -7.532000000 | -0.006800000 |
| 1 | 1.397200000  | -4.959200000 | 1.145500000  |
| 1 | 1.904100000  | -6.365800000 | 3.109600000  |
| 1 | 0.148600000  | -6.331500000 | 2.794600000  |
| 1 | 2.841800000  | -5.179000000 | -2.974200000 |
| 1 | 0.055500000  | -6.287200000 | -3.169800000 |
| 1 | 1.901200000  | -8.427700000 | 2.103500000  |
| 1 | 5.880500000  | -3.316700000 | 3.012500000  |
| 1 | -6.225200000 | -0.244400000 | 3.977400000  |
| 1 | 1.787200000  | 6.531700000  | -2.784200000 |
| 1 | 4.194000000  | -2.958700000 | -3.750000000 |
| 6 | -0.500700000 | 0.630000000  | 0.956400000  |
| 1 | -0.884800000 | 1.577900000  | 1.352000000  |
| 6 | -0.782600000 | -0.488400000 | 1.958900000  |
| 6 | 1.008400000  | 0.755300000  | 0.724000000  |
| 1 | 1.503800000  | 0.987100000  | 1.673900000  |
| 6 | 1.291500000  | 1.878300000  | -0.270300000 |
| 1 | 2.365700000  | 2.002900000  | -0.426800000 |
| 1 | 0.901000000  | 2.830200000  | 0.099300000  |
| 6 | 0.620400000  | 1.567400000  | -1.608200000 |
| 8 | 0.925200000  | 2.639400000  | -2.491600000 |
| 6 | 1.154300000  | 0.235900000  | -2.145500000 |
| 1 | 0.683400000  | 0.011600000  | -3.106300000 |
| 1 | 2.232800000  | 0.318000000  | -2.302900000 |
| 6 | -0.893100000 | 1.446900000  | -1.387400000 |
| 1 | -1.282200000 | 2.402400000  | -1.024400000 |
| 1 | -1.384000000 | 1.226400000  | -2.338600000 |
| 6 | -1.182400000 | 0.332400000  | -0.382200000 |
| 1 | -2.267100000 | 0.261800000  | -0.228500000 |
| 6 | -0.655600000 | -1.003200000 | -0.916000000 |
| 6 | -0.949100000 | -2.121200000 | 0.083500000  |
| 1 | -1.149700000 | -1.231000000 | -1.867500000 |
| 6 | 0.854100000  | -0.879300000 | -1.146000000 |
| 1 | 1.235600000  | -1.828700000 | -1.540500000 |
| 6 | 1.539100000  | -0.579100000 | 0.189400000  |

|   |              |              |              |
|---|--------------|--------------|--------------|
| 6 | 1.252200000  | -1.704400000 | 1.182100000  |
| 1 | 2.622200000  | -0.502200000 | 0.032200000  |
| 1 | 0.669500000  | 2.383900000  | -3.388600000 |
| 6 | -0.255400000 | -1.812700000 | 1.409000000  |
| 1 | -0.458700000 | -2.615300000 | 2.127200000  |
| 1 | -0.595300000 | -3.079600000 | -0.305500000 |
| 1 | -2.029100000 | -2.205200000 | 0.236000000  |
| 1 | -1.857400000 | -0.561600000 | 2.138200000  |
| 1 | -0.296200000 | -0.261100000 | 2.909400000  |
| 1 | 1.759000000  | -1.505500000 | 2.129200000  |
| 1 | 1.638400000  | -2.647500000 | 0.785000000  |

---

**4,9-DA(OH)<sub>2</sub>-γ-CD**

|   |              |              |              |
|---|--------------|--------------|--------------|
| 6 | 4.109800000  | 4.510600000  | -1.647700000 |
| 6 | 4.359800000  | 3.367500000  | -2.651800000 |
| 6 | 4.664500000  | 2.100900000  | -1.843100000 |
| 6 | 5.842700000  | 2.341100000  | -0.891300000 |
| 6 | 5.629700000  | 3.614200000  | -0.053400000 |
| 6 | 6.906400000  | 4.014400000  | 0.696300000  |
| 8 | 3.250300000  | 3.114100000  | -3.465800000 |
| 8 | 4.973900000  | 1.011800000  | -2.674200000 |
| 8 | 5.890700000  | 1.216400000  | -0.024600000 |
| 8 | 5.252200000  | 4.725000000  | -0.860900000 |
| 8 | 8.009000000  | 4.177300000  | -0.157600000 |
| 6 | -0.045100000 | 6.249100000  | 1.016800000  |
| 6 | 0.687600000  | 7.046900000  | -0.074900000 |
| 6 | 1.462900000  | 6.074900000  | -0.980000000 |
| 6 | 2.399000000  | 5.205300000  | -0.126400000 |
| 6 | 1.577400000  | 4.533200000  | 0.987000000  |
| 6 | 2.447900000  | 3.746500000  | 1.975100000  |
| 8 | -0.184400000 | 7.844900000  | -0.826800000 |
| 8 | 2.199700000  | 6.797300000  | -1.938900000 |
| 8 | 2.980100000  | 4.156200000  | -0.890300000 |
| 8 | 0.864000000  | 5.490400000  | 1.761300000  |
| 8 | 3.466700000  | 4.521900000  | 2.543900000  |
| 6 | -4.999500000 | 4.461200000  | 0.910000000  |
| 6 | -4.689100000 | 5.589500000  | -0.094900000 |
| 6 | -3.205700000 | 5.503100000  | -0.480600000 |
| 6 | -2.356500000 | 5.569300000  | 0.791300000  |
| 6 | -2.786300000 | 4.463900000  | 1.770100000  |
| 6 | -2.073200000 | 4.599400000  | 3.122500000  |
| 8 | -5.518000000 | 5.543700000  | -1.221400000 |
| 8 | -2.823500000 | 6.562000000  | -1.323900000 |
| 8 | -1.002800000 | 5.425100000  | 0.399500000  |
| 8 | -4.182300000 | 4.552400000  | 2.041300000  |
| 8 | -2.329400000 | 5.838600000  | 3.728900000  |
| 6 | -7.006500000 | -0.254000000 | -0.280600000 |
| 6 | -7.140900000 | 0.815200000  | -1.381000000 |
| 6 | -5.953700000 | 1.780100000  | -1.252000000 |
| 6 | -5.955300000 | 2.373500000  | 0.158700000  |
| 6 | -5.927200000 | 1.255900000  | 1.215500000  |
| 6 | -6.141800000 | 1.822100000  | 2.625600000  |
| 8 | -7.215900000 | 0.259700000  | -2.663400000 |
| 8 | -6.039000000 | 2.833800000  | -2.181600000 |
| 8 | -4.825100000 | 3.223100000  | 0.264600000  |
| 8 | -6.990600000 | 0.329200000  | 0.990200000  |
| 8 | -7.353300000 | 2.524200000  | 2.737900000  |
| 6 | -4.527300000 | -4.912100000 | -0.569100000 |
| 6 | -5.210900000 | -4.410100000 | -1.855800000 |
| 6 | -5.192300000 | -2.876700000 | -1.828500000 |
| 6 | -5.921600000 | -2.400500000 | -0.568800000 |
| 6 | -5.289500000 | -3.021800000 | 0.687300000  |
| 6 | -6.161400000 | -2.765500000 | 1.924800000  |
| 8 | -4.619300000 | -4.915400000 | -3.018200000 |
| 8 | -5.832500000 | -2.325300000 | -2.952200000 |
| 8 | -5.837200000 | -0.986300000 | -0.540500000 |
| 8 | -5.184200000 | -4.440100000 | 0.570000000  |
| 8 | -7.443200000 | -3.321100000 | 1.787200000  |
| 6 | 0.562400000  | -6.235100000 | -0.163700000 |
| 6 | 0.042900000  | -6.082800000 | -1.604000000 |
| 6 | -1.126600000 | -5.094800000 | -1.629100000 |
| 6 | -2.185400000 | -5.512000000 | -0.604900000 |
| 6 | -1.544400000 | -5.691700000 | 0.780700000  |
| 6 | -2.544000000 | -6.261300000 | 1.796000000  |
| 8 | 1.032100000  | -5.609400000 | -2.478800000 |

|   |              |              |              |
|---|--------------|--------------|--------------|
| 8 | -1.738200000 | -5.048000000 | -2.895500000 |
| 8 | -3.179400000 | -4.501100000 | -0.584500000 |
| 8 | -0.464800000 | -6.616300000 | 0.708200000  |
| 8 | -3.061000000 | -7.500800000 | 1.386400000  |
| 6 | 4.958700000  | -4.023500000 | 1.591400000  |
| 6 | 4.902000000  | -5.223000000 | 0.621600000  |
| 6 | 3.563100000  | -5.172200000 | -0.124100000 |
| 6 | 2.421200000  | -5.185300000 | 0.900200000  |
| 6 | 2.606600000  | -4.023600000 | 1.887600000  |
| 6 | 1.584600000  | -4.092300000 | 3.030300000  |
| 8 | 5.979400000  | -5.262900000 | -0.270300000 |
| 8 | 3.432700000  | -6.265800000 | -1.008000000 |
| 8 | 1.169100000  | -5.034700000 | 0.246700000  |
| 8 | 3.894600000  | -4.075600000 | 2.496400000  |
| 8 | 1.704000000  | -5.265700000 | 3.786100000  |
| 6 | 7.123300000  | 0.556200000  | 0.149300000  |
| 6 | 7.322700000  | -0.588700000 | -0.872700000 |
| 6 | 6.169300000  | -1.584400000 | -0.709400000 |
| 6 | 6.089700000  | -2.058400000 | 0.744000000  |
| 6 | 6.068400000  | -0.861700000 | 1.712100000  |
| 6 | 6.215700000  | -1.318100000 | 3.170000000  |
| 8 | 7.441000000  | -0.156600000 | -2.197700000 |
| 8 | 6.341900000  | -2.715800000 | -1.531200000 |
| 8 | 4.898900000  | -2.819500000 | 0.863600000  |
| 8 | 7.149400000  | 0.032200000  | 1.444000000  |
| 8 | 7.358900000  | -2.108100000 | 3.372000000  |
| 1 | 3.945700000  | 5.464000000  | -2.164900000 |
| 1 | 5.244400000  | 3.623500000  | -3.252300000 |
| 1 | 3.783700000  | 1.877100000  | -1.231400000 |
| 1 | 6.771100000  | 2.430400000  | -1.466500000 |
| 1 | 4.848300000  | 3.411500000  | 0.686600000  |
| 1 | 6.700500000  | 4.932400000  | 1.257000000  |
| 1 | 7.164700000  | 3.219000000  | 1.397700000  |
| 1 | 3.105400000  | 3.861300000  | -4.063200000 |
| 1 | 1.642400000  | 7.532900000  | -2.245100000 |
| 1 | -0.514700000 | 6.929400000  | 1.737900000  |
| 1 | 1.399300000  | 7.730900000  | 0.401300000  |
| 1 | 0.743800000  | 5.409200000  | -1.483300000 |
| 1 | 3.192500000  | 5.828000000  | 0.306000000  |
| 1 | 0.866000000  | 3.848200000  | 0.508500000  |
| 1 | 1.791300000  | 3.334000000  | 2.750600000  |
| 1 | 2.935000000  | 2.926700000  | 1.443700000  |
| 1 | -0.986600000 | 7.338500000  | -1.059400000 |
| 1 | 3.057800000  | 5.229900000  | 3.063000000  |
| 1 | -6.023700000 | 4.566100000  | 1.288900000  |
| 1 | -4.878000000 | 6.556200000  | 0.385500000  |
| 1 | -3.021900000 | 4.539400000  | -0.980000000 |
| 1 | -2.508900000 | 6.546000000  | 1.268300000  |
| 1 | -2.559000000 | 3.487600000  | 1.322200000  |
| 1 | -2.392700000 | 3.774500000  | 3.769300000  |
| 1 | -0.993700000 | 4.545400000  | 2.969100000  |
| 1 | -3.533200000 | 6.706600000  | -1.970800000 |
| 1 | -3.277400000 | 5.893800000  | 3.919700000  |
| 1 | -7.887500000 | -0.909300000 | -0.278400000 |
| 1 | -8.072300000 | 1.372900000  | -1.228900000 |
| 1 | -5.019000000 | 1.221600000  | -1.403300000 |
| 1 | -6.874900000 | 2.959300000  | 0.289100000  |
| 1 | -4.962700000 | 0.735900000  | 1.178300000  |
| 1 | -6.101200000 | 0.994600000  | 3.341500000  |
| 1 | -5.344800000 | 2.532500000  | 2.850400000  |
| 1 | -6.619200000 | -0.509900000 | -2.735500000 |
| 1 | -6.354300000 | 2.467700000  | -3.024200000 |
| 1 | -8.078800000 | 1.897200000  | 2.601700000  |
| 1 | -4.599900000 | -6.005000000 | -0.502800000 |
| 1 | -6.250200000 | -4.757000000 | -1.866700000 |
| 1 | -4.147000000 | -2.532700000 | -1.786600000 |
| 1 | -6.972400000 | -2.713100000 | -0.630500000 |
| 1 | -4.298200000 | -2.576600000 | 0.839100000  |
| 1 | -6.296100000 | -1.690100000 | 2.050500000  |
| 1 | -5.652400000 | -3.174500000 | 2.803900000  |
| 1 | -3.645000000 | -4.854500000 | -2.961600000 |
| 1 | -5.608900000 | -2.868300000 | -3.726100000 |
| 1 | -7.349900000 | -4.283000000 | 1.720000000  |
| 1 | 1.282300000  | -7.061600000 | -0.126000000 |
| 1 | -0.320700000 | -7.069800000 | -1.935000000 |

|   |              |              |              |
|---|--------------|--------------|--------------|
| 1 | -0.744200000 | -4.101700000 | -1.360200000 |
| 1 | -2.623700000 | -6.467100000 | -0.920800000 |
| 1 | -1.179100000 | -4.717000000 | 1.127200000  |
| 1 | -3.394200000 | -5.582200000 | 1.883900000  |
| 1 | -2.041900000 | -6.347400000 | 2.766100000  |
| 1 | 1.904900000  | -5.928900000 | -2.185500000 |
| 1 | -1.042500000 | -5.009200000 | -3.569800000 |
| 1 | 5.869200000  | -4.073100000 | 2.201200000  |
| 1 | 4.958600000  | -6.147900000 | 1.206800000  |
| 1 | 3.511800000  | -4.231300000 | -0.693800000 |
| 1 | 2.436300000  | -6.129700000 | 1.459600000  |
| 1 | 2.491900000  | -3.079200000 | 1.343300000  |
| 1 | 0.580900000  | -4.097500000 | 2.602600000  |
| 1 | 1.710500000  | -3.206700000 | 3.664200000  |
| 1 | 6.064400000  | -4.406100000 | -0.736000000 |
| 1 | 4.315700000  | -6.453400000 | -1.370600000 |
| 1 | 2.590200000  | -5.285800000 | 4.177000000  |
| 1 | 7.960900000  | 1.263700000  | 0.086400000  |
| 1 | 8.270900000  | -1.083100000 | -0.630500000 |
| 1 | 5.225700000  | -1.079800000 | -0.965900000 |
| 1 | 6.965800000  | -2.681500000 | 0.962400000  |
| 1 | 5.116400000  | -0.331700000 | 1.591700000  |
| 1 | 6.235300000  | -0.429400000 | 3.809500000  |
| 1 | 5.357100000  | -1.937600000 | 3.436500000  |
| 1 | 6.597700000  | 0.261400000  | -2.479300000 |
| 1 | 6.684400000  | -2.419600000 | -2.390300000 |
| 1 | 8.141000000  | -1.557400000 | 3.222300000  |
| 1 | 7.835400000  | 4.931900000  | -0.738900000 |
| 1 | -2.332700000 | -8.138600000 | 1.360100000  |
| 1 | -5.581200000 | 4.628800000  | -1.559700000 |
| 1 | 4.133300000  | 0.570900000  | -2.928800000 |
| 6 | 0.315100000  | 0.770700000  | 0.548200000  |
| 1 | 1.087800000  | 1.486400000  | 0.847700000  |
| 6 | -0.767900000 | 0.724500000  | 1.625200000  |
| 6 | 0.947600000  | -0.613700000 | 0.381400000  |
| 1 | 1.395700000  | -0.923800000 | 1.332400000  |
| 6 | 2.037000000  | -0.573300000 | -0.687500000 |
| 1 | 2.491300000  | -1.559700000 | -0.806800000 |
| 1 | 2.826900000  | 0.121200000  | -0.392800000 |
| 6 | 1.431300000  | -0.131800000 | -2.020900000 |
| 8 | 2.476700000  | -0.117100000 | -2.990400000 |
| 6 | 0.343800000  | -1.134700000 | -2.425700000 |
| 1 | -0.089700000 | -0.840200000 | -3.384000000 |
| 1 | 0.794300000  | -2.122900000 | -2.543700000 |
| 6 | 0.800800000  | 1.255800000  | -1.866500000 |
| 1 | 1.565600000  | 1.990400000  | -1.605000000 |
| 1 | 0.363400000  | 1.564100000  | -2.819000000 |
| 6 | -0.282900000 | 1.207800000  | -0.791500000 |
| 1 | -0.724000000 | 2.205900000  | -0.681400000 |
| 6 | -1.375700000 | 0.211200000  | -1.189000000 |
| 6 | -2.464600000 | 0.178900000  | -0.120700000 |
| 1 | -1.822500000 | 0.521700000  | -2.139600000 |
| 6 | -0.743700000 | -1.174500000 | -1.354100000 |
| 1 | -1.520200000 | -1.888900000 | -1.651000000 |
| 6 | -0.145600000 | -1.609900000 | -0.013500000 |
| 6 | -1.238500000 | -1.656200000 | 1.052000000  |
| 1 | 0.299600000  | -2.607300000 | -0.110200000 |
| 1 | 2.116900000  | 0.215900000  | -3.824600000 |
| 6 | -1.865400000 | -0.265200000 | 1.214200000  |
| 1 | -3.267000000 | -0.508800000 | -0.398400000 |
| 1 | -2.906700000 | 1.171400000  | 0.001600000  |
| 1 | -1.207300000 | 1.715300000  | 1.763800000  |
| 1 | -0.329400000 | 0.413700000  | 2.576600000  |
| 1 | -0.815500000 | -1.981800000 | 2.006100000  |
| 1 | -2.011700000 | -2.372300000 | 0.760400000  |
| 8 | -2.923500000 | -0.287900000 | 2.165100000  |
| 1 | -2.554400000 | -0.521900000 | 3.027900000  |

---
